# Supplementary material for: A Partial Picture of the Single-Cell Transcriptomics of Human IgA Nephropathy
Source: Front Immunol. 2021 Apr 16;12:645988. doi: 10.3389/fimmu.2021.645988 (PMC8085501; doi:10.3389/fimmu.2021.645988)
Supplement: Supplemental Table 3 — DEGs in cell subtypes of glomerulus comparing IgAN and control subjects. Abbreviations were as follows: pct.1, the percentage of cells where the gene is detected in the first group (IgAN patients); pct.2, the percentage of cells where the gene is detected in the second group (control subject); avg logFC, log fold-change of the average expression between the two groups, positive values indicate that the gene is more highly expressed in the first group. [file Table_3.xlsx]

## Sheet: MES
gene_id	p_val	avg_logFC	pct.1	pct.2	p_val_adj
RPS4Y1	3.2e-23	-0.935522	0.014	0.513	7.57e-19
C1R	2.72e-13	-1.14143	0.412	0.872	6.44e-09
MALAT1	7.5e-13	0.683002	1	1	1.78e-08
EIF1AY	7.56e-13	-0.496888	0	0.231	1.79e-08
MT1X	1.26e-11	-1.08278	0.62	0.974	2.97e-07
GPX3	7.26e-11	-0.926446	0.88	1	1.72e-06
B2M	1.01e-10	-0.619123	1	1	2.38e-06
MT1E	4.02e-10	-0.908723	0.856	1	9.52e-06
GADD45B	5.94e-10	1.42206	0.856	0.513	1.41e-05
ID2	7.98e-10	0.966689	0.931	0.615	1.89e-05
SLPI	1.34e-09	-1.33547	0.491	0.897	3.17e-05
C1S	1.36e-09	-0.773038	0.144	0.538	3.21e-05
MT-RNR1	1.62e-09	0.669328	1	1	3.84e-05
FTH1	3.05e-09	-0.712889	0.991	1	7.21e-05
MT1F	4.27e-09	-0.810057	0.778	1	0.000101108
TTTY15	1.05e-08	-0.280119	0.005	0.179	0.000249442
DDX3Y	1.05e-08	-0.280653	0.005	0.179	0.000249442
CLU	2.27e-08	-0.817259	0.833	1	0.000536548
VCAM1	2.28e-08	-0.791677	0.838	1	0.000538526
AL450405.1	5.2e-08	-0.626558	0.329	0.769	0.00123073
MT2A	6.38e-08	-0.739132	0.963	1	0.00150887
FGB	8.28e-08	-0.460797	0.014	0.205	0.00195802
SLC13A3	1.16e-07	-0.37942	0	0.128	0.0027544
TYRO3	1.19e-07	-0.292652	0.009	0.179	0.00282298
FABP1	1.48e-07	-0.46866	0.023	0.231	0.00349106
UBC	2.9e-07	-0.610676	0.852	1	0.00686258
SCD	5.06e-07	-0.525902	0.028	0.231	0.0119793
ALDOB	5.13e-07	-1.31725	0.227	0.564	0.0121282
SOX4	6.7e-07	0.683196	0.935	0.641	0.0158432
CYR61	7.06e-07	0.859313	0.542	0.103	0.016709
EDIL3	8.57e-07	0.787059	0.426	0	0.0202674
FOS	9.29e-07	0.838574	0.866	0.436	0.0219769
FADS1	1.15e-06	-0.757176	0.278	0.59	0.0272873
ARHGAP29	1.58e-06	-0.47039	0.931	1	0.0373772
FTL	1.59e-06	-0.761897	0.921	1	0.0375568
CHI3L2	1.78e-06	-0.276303	0.009	0.154	0.0421833
XIST	2.2e-06	0.736878	0.403	0	0.0519547
HLA-DRB5	2.68e-06	-0.265191	0.005	0.128	0.0633359
MTND1P23	2.77e-06	1.50796	0.486	0.103	0.0654246
IFITM2	4.69e-06	-0.600629	0.819	0.974	0.111044
IFITM3	6.44e-06	-0.549255	0.991	1	0.152361
TNFSF10	7.62e-06	-0.703389	0.792	0.923	0.180245
EFNA1	9.9e-06	-0.671193	0.199	0.487	0.234293
AC129507.1	9.99e-06	-0.740773	0.176	0.462	0.23642
CYP1B1	1.16e-05	-0.636869	0.718	0.949	0.275452
C6orf118	1.25e-05	-0.324295	0.014	0.154	0.296049
EIF1AX	1.38e-05	0.615279	0.681	0.308	0.326418
PNKP	1.53e-05	-0.337731	0.051	0.256	0.361505
TBCB	1.71e-05	-0.459635	0.671	0.897	0.404283
AL355032.1	1.78e-05	-0.301958	0.023	0.179	0.420473
ZBTB16	1.78e-05	-0.416234	0.023	0.179	0.420473
MT1G	2.04e-05	-0.802633	0.611	0.821	0.483196
ATF3	2.13e-05	0.938809	0.657	0.282	0.503458
MSLN	2.47e-05	-0.301185	0.065	0.282	0.584556
THY1	2.6e-05	0.697232	0.833	0.667	0.616232
EGR1	2.61e-05	0.816631	0.713	0.308	0.616412
SLC2A4RG	3.49e-05	-0.433364	0.102	0.333	0.826832
AL365357.1	3.6e-05	0.512231	0.329	0	0.851347
MVD	3.68e-05	-0.367927	0.046	0.231	0.870515
NR1D2	3.99e-05	-0.450221	0.088	0.308	0.943645
PLPP3	4.42e-05	-0.671857	0.417	0.718	1
HSP90AB1	4.55e-05	0.414325	0.986	1	1
ZNF304	4.78e-05	-0.25454	0.005	0.103	1
ZNF551	4.78e-05	-0.322256	0.005	0.103	1
NFKBIZ	5.29e-05	1.15132	0.579	0.231	1
ZFY-AS1	5.65e-05	-0.271271	0.005	0.103	1
MT2P1	5.68e-05	-0.433488	0.06	0.256	1
HBEGF	6.26e-05	0.797283	0.491	0.128	1
SLC22A2	6.36e-05	0.750268	0.63	0.308	1
IGFBP4	6.53e-05	-0.461769	0.458	0.718	1
ID3	6.73e-05	0.707188	0.514	0.154	1
DNAJA1	6.97e-05	0.559293	0.815	0.487	1
FCMR	7.35e-05	-0.397325	0.051	0.231	1
MSMO1	8.81e-05	-0.618759	0.273	0.538	1
RTN4	0.000104069	-0.391163	0.782	0.923	1
UMOD	0.000114355	2.07428	0.426	0.103	1
RNF157	0.000119036	-0.35513	0.148	0.41	1
FOSB	0.000126103	0.709062	0.463	0.128	1
FUT6	0.000135739	-0.335242	0.014	0.128	1
RPL26	0.000150422	-0.475386	0.912	1	1
FAH	0.000150817	-0.429636	0.097	0.308	1
VDAC2	0.000155924	-0.455662	0.417	0.667	1
CCDC173	0.000168779	-0.479659	0.032	0.179	1
RPS2	0.000169028	-0.360978	0.972	1	1
SMCO3	0.000174432	-0.378026	0.069	0.256	1
TPM4	0.000185603	0.606864	0.903	0.718	1
TEFM	0.000185658	-0.281654	0.032	0.179	1
SLC22A12	0.000185716	-0.275488	0.014	0.128	1
MTCO1P23	0.000206949	0.627058	0.278	0	1
MYLK	0.00020762	0.802528	0.495	0.179	1
PPIA	0.000209604	-0.371085	0.856	0.974	1
RPA2	0.000210322	-0.423003	0.153	0.385	1
PIK3R1	0.000227553	-0.468111	0.741	0.923	1
HIST1H2AC	0.000241086	0.522241	0.273	0	1
RPL21P28	0.000254267	-0.481422	0.472	0.718	1
HEXIM1	0.000254609	0.529935	0.384	0.077	1
TAGLN	0.000267425	0.700063	0.468	0.128	1
CHPF	0.000276542	-0.325282	0.046	0.205	1
FSD1L	0.000282298	-0.367175	0.046	0.205	1
PLK2	0.000292261	0.632572	0.389	0.077	1
SOD2	0.000294334	-0.680724	0.44	0.667	1
PABPC1	0.000312791	-0.325556	0.968	0.974	1
MTRNR2L1	0.000326194	0.689955	0.264	0	1
PRDX6	0.00036841	-0.417112	0.755	0.872	1
NPHS2	0.000388468	-0.518195	0.088	0.282	1
ID1	0.000506475	0.507357	0.329	0.051	1
IDI1	0.000532533	-0.478658	0.241	0.462	1
RPL10	0.00053386	-0.301833	0.94	0.974	1
H1FX	0.000540755	0.570524	0.463	0.179	1
MIOX	0.000543065	-0.703226	0.079	0.256	1
ID4	0.00054837	0.586863	0.375	0.103	1
NREP	0.000553397	0.689225	0.389	0.103	1
FXYD6	0.000568535	-0.399678	0.111	0.308	1
DNAJB4	0.000574004	0.546166	0.44	0.128	1
TCTEX1D2	0.000575202	-0.355656	0.148	0.359	1
MDH2	0.000577904	-0.413531	0.347	0.59	1
LY6E	0.000578116	-0.484702	0.694	0.846	1
RNPC3	0.000584028	0.536334	0.324	0.051	1
VGLL4	0.000587867	-0.451671	0.486	0.718	1
ANXA11	0.000604607	-0.356279	0.38	0.59	1
AIF1	0.000611243	-0.619397	0.093	0.282	1
RARRES3	0.000617307	-0.471834	0.449	0.692	1
HLA-A	0.000639042	-0.345618	0.801	0.949	1
INSIG1	0.00066064	-0.582113	0.208	0.41	1
RPLP0	0.000666617	-0.312028	0.94	1	1
CCND2	0.000671892	0.614102	0.523	0.231	1
MGEA5	0.000682866	0.422256	0.241	0	1
HSPE1	0.000685437	0.526656	0.699	0.436	1
AC022400.7	0.000695952	-0.252927	0.028	0.154	1
MT-ND2	0.000696549	0.382561	1	1	1
DDX3X	0.000714787	0.397231	0.338	0.051	1
XBP1	0.000732926	-0.637046	0.287	0.487	1
OGFRL1	0.000741336	0.476343	0.329	0.051	1
CTSA	0.000791912	-0.488433	0.264	0.487	1
PMAIP1	0.000839164	0.510725	0.282	0.026	1
ACAT2	0.000848683	-0.521711	0.208	0.436	1
ACTG1	0.000905678	0.443715	0.935	0.923	1
ASS1	0.000915669	-0.356239	0.546	0.769	1
FDFT1	0.000916386	-0.45456	0.273	0.487	1
SMIM19	0.000944274	-0.407671	0.255	0.487	1
CDV3	0.000962258	0.474591	0.579	0.282	1
SERPINA1	0.000992933	0.784954	0.37	0.103	1
SERTAD1	0.00101293	0.53644	0.31	0.051	1
HACL1	0.00103705	-0.264636	0.042	0.179	1
PRPF38B	0.00103883	0.433799	0.417	0.128	1
RAI14	0.00104045	0.509385	0.375	0.128	1
BBOX1	0.00105409	-0.546382	0.074	0.231	1
ARIH2	0.00121275	0.419636	0.222	0	1
DPYS	0.00126236	-0.265787	0.032	0.154	1
RNPEP	0.0012713	-0.343592	0.088	0.256	1
JUNB	0.00133696	0.510234	0.708	0.436	1
PLEKHH2	0.0013646	0.577168	0.458	0.179	1
GKAP1	0.00137126	0.416047	0.269	0.026	1
MT-TP	0.00137287	0.595958	0.69	0.385	1
CHMP5	0.00142421	0.379945	0.38	0.103	1
CITED2	0.00147856	0.538138	0.685	0.538	1
HAUS2	0.00148977	-0.396213	0.06	0.205	1
ABCB1	0.00150253	0.322957	0.546	0.205	1
CPAMD8	0.00159957	-0.286345	0.046	0.179	1
GPNMB	0.00160766	0.491986	0.213	0	1
DDIT4	0.00160766	0.411495	0.213	0	1
SHTN1	0.00163199	0.505849	0.495	0.231	1
DDIT3	0.00164645	0.724982	0.491	0.256	1
DCXR	0.00164675	-0.586736	0.31	0.538	1
PTP4A2	0.00165029	0.363784	0.56	0.256	1
DNAJB1	0.00175437	0.623515	0.625	0.333	1
AGMAT	0.00175577	-0.332025	0.046	0.179	1
HES1	0.00178992	0.641374	0.898	0.718	1
JUN	0.00179543	0.45421	0.931	0.769	1
FXYD2	0.00180236	0.409279	0.324	0.077	1
C1orf194	0.00182734	-0.328877	0.014	0.103	1
SYAP1	0.00183603	0.382349	0.644	0.333	1
RCN1	0.00184379	-0.308426	0.213	0.436	1
HSP90B1	0.00190362	0.375784	0.94	0.872	1
SDHC	0.00190478	-0.269329	0.37	0.59	1
MARCKSL1	0.00191199	0.391369	0.25	0.026	1
MT1M	0.0019521	-0.428974	0.31	0.538	1
LINC01578	0.00197196	0.362024	0.315	0.077	1
CIRBP	0.00197291	-0.441461	0.778	0.846	1
BRD7	0.00200908	0.274836	0.463	0.179	1
IER2	0.00205615	0.583706	0.792	0.615	1
KLF4	0.00212401	0.426831	0.204	0	1
DNAJC10	0.00228999	0.447312	0.38	0.128	1
DYNLL1	0.00232616	0.36949	0.856	0.718	1
FAM107B	0.0023682	0.464138	0.565	0.282	1
MIF-AS1	0.00237446	-0.293339	0.079	0.231	1
DERA	0.00241011	-0.299077	0.079	0.231	1
CD24	0.00252954	0.562719	0.773	0.538	1
QPRT	0.00255051	-0.463878	0.153	0.333	1
VAMP2	0.00255396	-0.417136	0.63	0.744	1
SLU7	0.00259752	-0.467849	0.38	0.564	1
CALM3	0.00267916	-0.497811	0.315	0.487	1
CDKN2AIP	0.00268262	0.493511	0.306	0.077	1
RPL35A	0.00268438	-0.351949	0.968	1	1
SLC9A3R2	0.00291073	0.349017	0.245	0.026	1
GADD45G	0.00298606	0.511892	0.352	0.103	1
THBS1	0.00299247	0.513023	0.472	0.231	1
PPP1R9A	0.00307073	0.408183	0.352	0.103	1
MAP3K2	0.00309821	-0.399111	0.199	0.385	1
PTMS	0.00309854	0.434983	0.736	0.487	1
RLF	0.00320602	0.335152	0.19	0	1
ASPH	0.00320665	0.505078	0.56	0.308	1
TPM2	0.00327543	0.386182	0.324	0.077	1
FOXRED2	0.00344343	-0.323129	0.028	0.128	1
CFDP1	0.00348359	0.498275	0.481	0.231	1
TYMP	0.00363667	-0.5477	0.171	0.333	1
SPATA7	0.00367194	0.372006	0.185	0	1
ZC3H7A	0.00371546	0.404803	0.269	0.051	1
QDPR	0.00389462	-0.406856	0.157	0.333	1
BX284668.5	0.00393192	-0.411969	0.153	0.333	1
HSPB8	0.00396105	-0.398037	0.116	0.282	1
GPC3	0.00399133	-0.298708	0.37	0.59	1
WSCD2	0.00400562	-0.301316	0.083	0.231	1
HLA-C	0.00403768	-0.365825	0.741	0.872	1
C9orf3	0.00420058	0.438427	0.333	0.103	1
RUVBL1	0.00420241	0.341735	0.181	0	1
LPAR6	0.00425842	0.396707	0.468	0.179	1
TSNAX	0.00428023	-0.369648	0.171	0.359	1
HMGCS1	0.00431972	-0.512934	0.241	0.41	1
ODF3B	0.00441311	-0.336296	0.056	0.179	1
AK4	0.00446591	-0.40037	0.171	0.359	1
DROSHA	0.00456889	-0.319907	0.088	0.231	1
MRPS18B	0.00458797	-0.405078	0.477	0.641	1
PCMT1	0.00464356	0.361768	0.31	0.077	1
FMNL3	0.00474617	-0.254153	0.019	0.103	1
AP1S1	0.004806	0.329849	0.176	0	1
MTATP6P1	0.00481888	0.329547	0.995	0.974	1
BMP6	0.00486311	-0.255242	0.019	0.103	1
NF1	0.00499172	0.331112	0.255	0.051	1
AC092069.1	0.00527637	-0.483641	0.162	0.333	1
RBP5	0.00535536	-0.393895	0.056	0.179	1
HEIH	0.00541378	-0.28581	0.144	0.308	1
CTSC	0.00564608	0.549453	0.806	0.718	1
UFD1	0.00565997	-0.367376	0.144	0.308	1
RPS14	0.00571895	-0.27201	0.981	0.974	1
SFXN1	0.00579703	-0.324922	0.074	0.205	1
C11orf68	0.00581375	-0.27247	0.069	0.205	1
YTHDC1	0.00587356	0.327061	0.718	0.436	1
SH3GLB1	0.00606293	0.36509	0.565	0.308	1
NMRAL1	0.00613763	-0.306593	0.088	0.231	1
UBAP2	0.00624248	0.305173	0.481	0.231	1
EGR2	0.00627239	0.322947	0.167	0	1
MORC3	0.00627239	0.270775	0.167	0	1
TUBB4B	0.00633637	0.415313	0.514	0.256	1
ACBD5	0.00636557	0.37022	0.495	0.256	1
DSP	0.00638231	0.598642	0.449	0.231	1
HSD17B8	0.00641051	-0.296447	0.106	0.256	1
SETD3	0.00656268	0.441032	0.31	0.103	1
ZNRF3	0.00667818	-0.286315	0.074	0.205	1
PHGDH	0.00667818	-0.32325	0.074	0.205	1
IQGAP2	0.00669326	-0.442486	0.19	0.359	1
KIAA1217	0.00672823	-0.289373	0.264	0.462	1
SOS2	0.00675976	0.345478	0.245	0.051	1
SNHG19	0.00679526	-0.4745	0.093	0.231	1
MSC-AS1	0.00682646	0.300188	0.333	0.103	1
ETHE1	0.00689771	-0.402454	0.106	0.256	1
C3orf58	0.00698563	-0.421284	0.213	0.385	1
GALNT14	0.00703135	0.319129	0.329	0.103	1
ILF3-AS1	0.00703922	-0.427434	0.282	0.462	1
EIF3M	0.00704307	-0.290968	0.593	0.795	1
SNORD3A	0.00708171	0.506573	0.565	0.333	1
BBOF1	0.00715836	0.281223	0.162	0	1
ATF4	0.00721929	0.418497	0.579	0.333	1
ATP1B3	0.0073132	0.29478	0.292	0.077	1
RASSF8	0.00743309	0.402771	0.324	0.103	1
CLDN3	0.00744948	-0.359721	0.384	0.59	1
RSU1	0.00761594	0.375374	0.25	0.051	1
SQLE	0.00762048	-0.490987	0.528	0.692	1
TCEA3	0.00768906	0.363112	0.407	0.179	1
EMID1	0.00770526	-0.369906	0.032	0.128	1
BRD3	0.00774416	0.378636	0.31	0.103	1
CPM	0.0078157	0.418348	0.5	0.256	1
BEX3	0.00786737	-0.266941	0.884	0.949	1
SLC13A1	0.00789328	-0.25317	0.074	0.205	1
SLC16A9	0.00795411	-0.312574	0.06	0.179	1
KPNA1	0.00816412	0.312719	0.157	0	1
GOLGA8B	0.00820586	0.33779	0.241	0.051	1
TCF4	0.00823227	-0.284386	0.157	0.333	1
BEX4	0.00830561	-0.279289	0.361	0.538	1
PRPF40A	0.00837606	-0.281707	0.704	0.769	1
GPD1	0.00841658	-0.2573	0.046	0.154	1
TNFSF13B	0.00841658	-0.269749	0.046	0.154	1
FBXL15	0.00845776	-0.500464	0.111	0.256	1
SCML1	0.00847402	-0.257822	0.032	0.128	1
CHD4	0.00849171	0.422308	0.606	0.359	1
CCND1	0.00889315	0.396059	0.542	0.308	1
MAP3K5	0.00890826	-0.397211	0.181	0.333	1
NDUFS4	0.00898039	-0.42852	0.551	0.692	1
MT-ND4L	0.00898844	0.365136	0.995	1	1
SAFB2	0.00899397	0.308148	0.366	0.128	1
CNIH1	0.0089993	-0.29975	0.13	0.282	1
NFIB	0.00923757	0.422535	0.264	0.077	1
MGAT4C	0.00930529	0.333504	0.153	0	1
SENP5	0.00930529	0.285852	0.153	0	1
IGF2BP2	0.00930529	0.263821	0.153	0	1
PDLIM7	0.00930529	0.256746	0.153	0	1
TMEM38B	0.00933728	-0.354802	0.134	0.282	1
OXTR	0.00940508	-0.410452	0.19	0.359	1
PPFIBP1	0.00946393	0.409055	0.667	0.462	1
ATP5IF1	0.00956523	-0.328075	0.903	0.923	1
TSC22D1	0.00962528	-0.331546	0.847	0.923	1
C11orf1	0.00964557	-0.295315	0.176	0.333	1
NDUFA11	0.00968055	-0.283935	0.625	0.744	1
RPS28	0.00969406	-0.290706	0.977	1	1
RTL8A	0.00994579	-0.38511	0.213	0.385	1
PTPN1	0.00999469	-0.620392	0.356	0.487	1
HP1BP3	0.0101401	-0.297327	0.806	0.872	1
ARL4C	0.010309	0.480251	0.231	0.051	1
RBP4	0.0103157	0.526927	0.264	0.077	1
MNAT1	0.010319	0.295873	0.324	0.103	1
NIPBL	0.0104258	0.272312	0.556	0.282	1
C3	0.0104264	-0.451792	0.111	0.256	1
FAM111A	0.0104292	0.387346	0.236	0.051	1
KLF5	0.0104681	0.275546	0.199	0.026	1
CFI	0.0104764	-0.322501	0.153	0.308	1
RBM3	0.0105399	-0.292517	0.403	0.59	1
NHLRC2	0.0105468	-0.396965	0.111	0.256	1
MBNL2	0.0105567	0.374402	0.412	0.179	1
SOCS1	0.0105995	0.278754	0.148	0	1
GAPVD1	0.0105995	0.262096	0.148	0	1
PPP1R15A	0.0106074	0.341765	0.519	0.256	1
TUBA1A	0.0107128	0.506916	0.477	0.256	1
TACC1	0.0109044	0.355034	0.306	0.103	1
NSA2	0.0109103	-0.284933	0.551	0.744	1
PDGFD	0.011054	0.340277	0.278	0.077	1
SDF4	0.011115	0.348612	0.301	0.103	1
TMX4	0.0111681	0.373159	0.616	0.359	1
C5orf42	0.0111747	0.371408	0.194	0.026	1
CLSTN2	0.0111751	0.340692	0.273	0.077	1
CLCC1	0.0112274	-0.261274	0.093	0.231	1
AES	0.0112619	0.368907	0.398	0.179	1
ARHGAP23	0.0113756	-0.348575	0.065	0.179	1
MYDGF	0.0113768	0.285468	0.273	0.077	1
TOMM7	0.0114428	-0.280388	0.778	0.897	1
PPIE	0.0114536	-0.251912	0.278	0.462	1
FOXO3	0.0115047	-0.267704	0.204	0.385	1
ING1	0.0115431	0.351293	0.227	0.051	1
SUZ12	0.0117397	0.316114	0.338	0.128	1
ERG28	0.0119268	-0.2767	0.208	0.385	1
SEC22B	0.011961	0.340625	0.222	0.051	1
CUL3	0.0120502	0.339249	0.287	0.103	1
MT1A	0.0120666	0.459182	0.144	0	1
SPECC1	0.0120666	0.291678	0.144	0	1
CLEC4M	0.0120898	-0.293339	0.051	0.154	1
UGT2B7	0.0121145	-0.545431	0.565	0.667	1
SLC39A10	0.0121313	0.353701	0.366	0.154	1
DKK3	0.0122979	0.305775	0.19	0.026	1
ARL4A	0.0123619	0.372914	0.398	0.179	1
EIF4A3	0.0124373	0.277061	0.491	0.256	1
KRT8	0.012453	-0.436431	0.301	0.462	1
USP11	0.0125832	-0.358498	0.236	0.385	1
CIB1	0.012598	0.332259	0.435	0.205	1
TMEM167A	0.0126406	-0.32497	0.231	0.385	1
H2AFX	0.0129472	0.270723	0.19	0.026	1
TNRC6B	0.012962	-0.344118	0.546	0.667	1
SGK1	0.0130437	0.300151	0.264	0.077	1
EVA1C	0.0130692	-0.379832	0.083	0.205	1
MITD1	0.0134883	0.257725	0.19	0.026	1
EFNA5	0.0135044	-0.428808	0.338	0.513	1
PDGFRL	0.0135077	-0.365158	0.176	0.333	1
GRINA	0.0136585	-0.312061	0.31	0.462	1
METRN	0.0137291	0.277901	0.139	0	1
HOXA7	0.0138776	-0.335614	0.319	0.487	1
CCDC115	0.013901	-0.318623	0.185	0.333	1
PLTP	0.0139515	-0.27543	0.139	0.282	1
AC007906.2	0.0139788	0.514232	0.426	0.205	1
MARF1	0.0140713	0.27183	0.222	0.051	1
MAP1LC3B	0.0141782	0.275618	0.593	0.359	1
MCCD1	0.0143054	-0.355152	0.051	0.154	1
RSPO3	0.0143949	-0.426965	0.157	0.308	1
UACA	0.0144149	0.526314	0.634	0.436	1
FAM3C	0.014577	0.294601	0.454	0.205	1
IFI6	0.0145834	-0.26897	0.486	0.615	1
SLC38A2	0.0146789	0.437297	0.287	0.103	1
SPAG16	0.0146789	0.273102	0.287	0.103	1
LAMP5	0.0146992	-0.337942	0.176	0.333	1
SASH1	0.0147621	-0.338749	0.222	0.385	1
CCNL1	0.0147779	0.428223	0.532	0.333	1
SRSF7	0.0152064	0.514028	0.579	0.41	1
CDH16	0.0153164	0.299656	0.222	0.051	1
GMNN	0.015329	0.253568	0.227	0.051	1
CCDC90B	0.0153327	0.333965	0.282	0.103	1
MYLIP	0.0154136	0.346566	0.292	0.103	1
CXCL12	0.0154342	0.471117	0.218	0.051	1
UBE2Q1	0.0154481	0.344149	0.347	0.154	1
SST	0.0156123	0.654032	0.134	0	1
ANKRD1	0.0156123	0.597595	0.134	0	1
AR	0.0156123	0.285965	0.134	0	1
S100A4	0.0156123	0.284649	0.134	0	1
INTS11	0.0156627	-0.345115	0.102	0.231	1
ACSL4	0.0157995	0.362639	0.352	0.154	1
KLK7	0.0160631	-0.323235	0.231	0.385	1
SLC3A1	0.0161736	0.455616	0.287	0.103	1
ADM	0.0161759	0.250314	0.176	0.026	1
PSMG3	0.0164757	0.282779	0.181	0.026	1
SLC37A4	0.0164992	-0.376432	0.208	0.359	1
MAGED1	0.0165435	-0.320858	0.231	0.385	1
UBE2S	0.0167438	0.313989	0.255	0.077	1
ZRANB2	0.0167708	0.385022	0.579	0.359	1
PCBD2	0.0168231	-0.378879	0.069	0.179	1
TUSC1	0.0171152	-0.383668	0.213	0.359	1
CRYL1	0.0172005	-0.347894	0.255	0.41	1
COL3A1	0.0172519	0.527744	0.282	0.103	1
DCUN1D4	0.0175589	0.257687	0.176	0.026	1
C1RL	0.0176789	-0.33963	0.125	0.256	1
EGOT	0.0177031	0.427041	0.472	0.256	1
AC060780.1	0.0177317	-0.252496	0.069	0.179	1
RIPPLY1	0.0177447	0.494823	0.13	0	1
MORC4	0.0177447	0.280883	0.13	0	1
RPL7L1	0.0177573	0.366413	0.468	0.256	1
TUBB2A	0.0178223	0.319724	0.25	0.077	1
APOE	0.0180575	-0.514878	0.199	0.359	1
YBX1	0.0180693	0.251363	0.856	0.718	1
SSBP2	0.0182233	-0.306863	0.144	0.282	1
ITM2A	0.0185863	0.289749	0.255	0.077	1
CHORDC1	0.0186344	0.355023	0.245	0.077	1
FBXW5	0.0189276	-0.285808	0.069	0.179	1
NKAIN4	0.0190724	-0.271709	0.181	0.333	1
CD83	0.01909	0.27596	0.171	0.026	1
FRG1BP	0.0191094	-0.363107	0.185	0.333	1
CDC42BPA	0.01916	0.355948	0.352	0.154	1
SLC35E1	0.0192081	-0.349639	0.125	0.256	1
IER3	0.0192955	0.370572	0.699	0.513	1
HOXA5	0.0196127	0.270174	0.208	0.051	1
PRKRIP1	0.0196148	0.29426	0.343	0.128	1
RNF44	0.0196186	-0.262898	0.102	0.231	1
PCP4	0.0196223	-0.461901	0.532	0.667	1
FUNDC2	0.0196362	0.293666	0.245	0.077	1
ZFP36L2	0.0196872	0.366505	0.583	0.385	1
WT1	0.0197058	-0.261959	0.366	0.538	1
AK6	0.0199805	0.338399	0.245	0.077	1
TULP3	0.0200134	-0.273041	0.106	0.231	1
AC004870.2	0.0201161	-0.283388	0.056	0.154	1
RASD1	0.0201589	0.325378	0.125	0	1
RASAL2	0.0201589	0.319988	0.125	0	1
TIPARP	0.0203095	0.316801	0.204	0.051	1
UXS1	0.0204196	0.355946	0.407	0.205	1
SRPK1	0.0204678	0.356097	0.287	0.103	1
TACSTD2	0.0205839	-0.484047	0.491	0.59	1
C5orf24	0.0205907	0.302256	0.343	0.154	1
SH3BGRL3	0.0207213	0.406396	0.579	0.385	1
HIBCH	0.0211328	-0.361219	0.106	0.231	1
TRAPPC2L	0.0212522	-0.297656	0.185	0.333	1
OSBPL1A	0.0213594	0.328785	0.366	0.179	1
MITF	0.0216733	0.265653	0.347	0.154	1
KDELR3	0.0218291	0.267063	0.167	0.026	1
SCO1	0.0218304	-0.288837	0.106	0.231	1
PSAP	0.0219244	-0.281816	0.819	0.872	1
AKAP5	0.0220452	0.294425	0.324	0.128	1
TUBA1C	0.0220894	0.381774	0.384	0.179	1
SYNE1	0.02213	0.396373	0.847	0.718	1
NOP16	0.0223937	-0.2928	0.088	0.205	1
NEU1	0.0225092	0.316326	0.278	0.103	1
PHF11	0.0225372	0.253773	0.213	0.051	1
FLG	0.0228914	0.604563	0.12	0	1
FN1	0.0228914	0.446525	0.12	0	1
AC004540.2	0.0228914	0.298485	0.12	0	1
SNHG9	0.0229311	0.314446	0.273	0.103	1
RALY	0.0230161	-0.289115	0.208	0.359	1
NDUFC1	0.0233128	-0.310107	0.773	0.872	1
CUBN	0.0237893	-0.328245	0.106	0.231	1
KLF10	0.0238876	0.322266	0.412	0.205	1
RPL9P9	0.0239734	0.412884	0.676	0.59	1
OSBPL9	0.0241825	0.329154	0.426	0.205	1
CES2	0.0245099	-0.269946	0.125	0.256	1
RGS2	0.0246326	0.286261	0.167	0.026	1
SNX4	0.0246599	0.276966	0.204	0.051	1
WASHC2C	0.0248386	0.300647	0.236	0.077	1
HNRNPA2B1	0.024859	0.352083	0.801	0.615	1
SPRY1	0.0249014	0.473983	0.537	0.385	1
NPR3	0.0252	0.40369	0.574	0.436	1
SYK	0.0252361	-0.354747	0.366	0.513	1
GATM	0.0253049	-0.37247	0.255	0.385	1
UROD	0.0256267	-0.350639	0.356	0.487	1
GNAS	0.0256822	0.261966	0.847	0.744	1
TTF1	0.0257936	-0.259479	0.167	0.308	1
LINC01320	0.0259633	-0.364574	0.259	0.41	1
AC027013.1	0.0259837	0.31461	0.116	0	1
ZNF770	0.0259955	0.358255	0.37	0.179	1
CFLAR	0.0260192	-0.313227	0.315	0.462	1
LRRC75A-AS1	0.0265986	-0.251759	0.792	0.821	1
TPMT	0.0267673	0.296311	0.296	0.128	1
DUSP1	0.0269523	0.277291	0.69	0.59	1
IL13RA1	0.0269822	-0.355139	0.181	0.308	1
POP7	0.0270395	-0.418025	0.134	0.256	1
MAFF	0.0270868	0.254398	0.157	0.026	1
DCUN1D1	0.0270952	0.309552	0.398	0.205	1
CDCA7L	0.0271411	0.274931	0.245	0.077	1
PFKP	0.0271853	0.268561	0.194	0.051	1
MAPK1IP1L	0.0272388	-0.393613	0.222	0.359	1
ERLIN2	0.0272737	0.250894	0.236	0.077	1
SCIN	0.0272922	0.275859	0.278	0.103	1
SYTL2	0.0273679	0.376976	0.639	0.462	1
TMEM184C	0.0274356	0.268624	0.194	0.051	1
ACTR2	0.0275304	0.334665	0.468	0.256	1
DAZAP2	0.0276534	-0.255941	0.597	0.744	1
CARHSP1	0.0278832	-0.350655	0.287	0.41	1
CLDN4	0.0279086	0.257002	0.241	0.077	1
PRLR	0.0280169	-0.291075	0.093	0.205	1
RPL36AL	0.0281836	0.269828	0.736	0.513	1
MAPKAP1	0.0281963	0.310097	0.361	0.154	1
U2SURP	0.0283982	0.354215	0.574	0.41	1
KLHL20	0.0284254	-0.259321	0.056	0.154	1
APOO	0.0284684	-0.295541	0.25	0.385	1
FHL2	0.0287282	0.347106	0.37	0.179	1
VEGFA	0.028752	0.255901	0.204	0.051	1
BLOC1S5	0.0288266	-0.272862	0.426	0.59	1
DEFB1	0.0290461	1.0598	0.593	0.462	1
LGALS3BP	0.0291176	-0.298711	0.37	0.513	1
KMT2A	0.0294008	0.386196	0.514	0.385	1
TRIM2	0.0294024	-0.333515	0.157	0.282	1
GPC4	0.0294141	0.336875	0.361	0.179	1
NNMT	0.0294829	0.407769	0.111	0	1
RPL12P4	0.0296419	-0.332152	0.245	0.385	1
BNC2	0.0296455	0.390406	0.185	0.051	1
SLC16A12	0.0298508	0.28519	0.153	0.026	1
JMJD1C	0.0303169	0.396686	0.458	0.282	1
SLC7A2	0.0303232	-0.277936	0.111	0.231	1
PDLIM1	0.03034	0.266515	0.199	0.051	1
WISP3	0.0305031	-0.26859	0.306	0.462	1
SLC12A1	0.0307008	1.30074	0.25	0.103	1
LRRFIP1	0.0312026	-0.304475	0.708	0.769	1
CIAO1	0.0312566	0.286309	0.231	0.077	1
CAMKK2	0.0312725	-0.260855	0.093	0.205	1
TAPBP	0.0314449	-0.474177	0.412	0.513	1
PSMB1	0.0315814	-0.255247	0.551	0.718	1
ZNF518A	0.031604	0.254201	0.241	0.077	1
TSPAN2	0.0316991	0.278656	0.315	0.128	1
CHCHD5	0.0324359	-0.29229	0.157	0.282	1
YWHAH	0.0328809	0.265999	0.356	0.154	1
CCDC6	0.0329253	0.26274	0.227	0.077	1
VPS35	0.0329332	0.27023	0.532	0.333	1
TM9SF3	0.0329627	0.320512	0.514	0.308	1
TMEM123	0.0331304	0.363736	0.616	0.462	1
HSP90AA1	0.0331635	0.271114	0.986	1	1
NEMF	0.0332926	0.347259	0.398	0.231	1
PHF20	0.0333259	0.252562	0.273	0.103	1
RBBP6	0.03335	0.375988	0.556	0.359	1
ZNHIT6	0.0337293	0.279329	0.343	0.154	1
RNF145	0.0339178	0.259864	0.375	0.179	1
SLC25A24	0.0342428	0.273554	0.231	0.077	1
PLS3	0.0343592	0.253306	0.19	0.051	1
METTL21A	0.0348645	0.285117	0.181	0.051	1
COQ2	0.0360016	-0.276934	0.046	0.128	1
RAD23B	0.0360544	0.263211	0.407	0.205	1
ATP2B4	0.0360706	0.279395	0.227	0.077	1
MRPL28	0.0361368	-0.427345	0.162	0.282	1
LCORL	0.0362417	0.252543	0.153	0.026	1
PTN	0.0362868	0.472901	0.329	0.154	1
MED25	0.0364418	-0.333778	0.12	0.231	1
MORF4L1P1	0.0365499	0.267754	0.509	0.282	1
ARHGAP24	0.0366215	0.313648	0.62	0.41	1
UBAP1	0.0368527	0.262985	0.264	0.103	1
STAT1	0.0368812	-0.303885	0.681	0.795	1
MRPL52	0.0369225	-0.291932	0.366	0.487	1
HSPH1	0.0373112	0.478359	0.421	0.256	1
POLD2	0.0373174	-0.325083	0.19	0.308	1
LPCAT2	0.0374311	0.283383	0.324	0.154	1
RRAGD	0.0378264	0.280377	0.181	0.051	1
S100A10	0.0379039	0.264649	0.907	0.821	1
UGT2A3	0.037923	0.347771	0.102	0	1
BAG1	0.0382393	-0.262711	0.278	0.41	1
FNDC3B	0.0382933	0.261879	0.301	0.128	1
PHB2	0.0385182	-0.260696	0.264	0.385	1
ARHGDIB	0.0385569	0.268809	0.185	0.051	1
KRT7	0.0387377	0.475759	0.259	0.103	1
APIP	0.0388313	0.272907	0.227	0.077	1
AKAP11	0.0389508	0.318533	0.356	0.179	1
ING2	0.0391488	0.266385	0.227	0.077	1
SLC5A12	0.0391885	-0.275477	0.046	0.128	1
GLUL	0.0394768	-0.352216	0.5	0.615	1
CLDN1	0.0397692	-0.266812	0.773	0.872	1
EMC4	0.0399986	0.266884	0.505	0.308	1
NUCB1	0.0401399	-0.264638	0.204	0.333	1
BTBD7	0.040285	-0.279654	0.273	0.41	1
PALLD	0.0405431	-0.346317	0.722	0.795	1
TUBB6	0.0406363	0.273135	0.181	0.051	1
PNN	0.0406392	0.331289	0.574	0.385	1
GRIPAP1	0.040699	-0.311438	0.079	0.179	1
WFDC2	0.0409274	-0.361733	0.356	0.462	1
RIOK1	0.0410874	0.278381	0.139	0.026	1
MZT2B	0.0414259	-0.316315	0.565	0.641	1
SLC25A3	0.0416452	-0.319911	0.644	0.692	1
PDCD6	0.0419915	0.257061	0.417	0.231	1
PLEKHA5	0.0422684	0.306595	0.514	0.308	1
AEBP1	0.0430261	0.329129	0.606	0.436	1
PRELID1	0.0433347	-0.282863	0.269	0.41	1
CLCNKB	0.0439482	0.252217	0.144	0.026	1
PPFIA1	0.0446245	0.311684	0.255	0.103	1
FTH1P10	0.0451819	-0.296781	0.144	0.256	1
PIAS1	0.0454161	-0.275527	0.19	0.308	1
ZBTB20	0.0459876	-0.321448	0.625	0.744	1
SLC3A2	0.0462011	-0.261759	0.231	0.359	1
BRCC3	0.0462711	0.305663	0.282	0.128	1
COL4A1	0.0462941	0.384624	0.491	0.308	1
PCSK1N	0.0463309	0.263766	0.208	0.077	1
FAM98A	0.0467019	0.281695	0.463	0.282	1
IVNS1ABP	0.0468829	0.303153	0.273	0.128	1
SQOR	0.0477981	-0.309852	0.19	0.308	1
DYNC1H1	0.047811	-0.268125	0.398	0.538	1
ARID1A	0.0485184	-0.272675	0.097	0.205	1
DDX54	0.0485273	-0.27184	0.083	0.179	1
HSD11B1L	0.0487352	-0.25925	0.065	0.154	1
RBMS3	0.0487998	0.276092	0.222	0.077	1
YARS	0.0488478	-0.35446	0.106	0.205	1
DDX21	0.0496964	0.369196	0.435	0.282	1
ALCAM	0.0498708	0.289187	0.412	0.256	1
PPP2R3A	0.0500573	0.2685	0.273	0.128	1
VPS41	0.0503516	0.327014	0.361	0.205	1
TBCA	0.0503926	-0.282198	0.662	0.718	1
HSPB1	0.0508535	-0.278931	0.917	0.872	1
GTF2I	0.0509545	0.287308	0.505	0.333	1
SLC25A4	0.0511276	0.268009	0.38	0.205	1
ANAPC5	0.0520548	0.283949	0.31	0.154	1
ORMDL1	0.0522338	-0.276404	0.269	0.385	1
ACTB	0.0523427	0.260757	0.954	0.949	1
ATP6AP2	0.0527232	0.326028	0.602	0.41	1
SFRP1	0.0537081	0.378014	0.181	0.051	1
AHNAK	0.053883	0.354061	0.519	0.359	1
COPZ1	0.0550242	-0.25474	0.255	0.385	1
CTSB	0.0553998	-0.281236	0.657	0.769	1
ST13	0.0557996	-0.267277	0.75	0.846	1
CTDSPL	0.0561301	-0.343288	0.227	0.359	1
ATP1B1	0.0561819	0.289527	0.903	0.821	1
PSMB3	0.0562871	-0.286339	0.366	0.487	1
ERAL1	0.0562986	-0.258129	0.083	0.179	1
BTG2	0.0564945	0.314241	0.347	0.179	1
WSB1	0.0565641	0.289072	0.389	0.231	1
CXCL1	0.05714	-0.567119	0.403	0.487	1
ERC1	0.0577874	0.250947	0.218	0.077	1
CMAS	0.0577957	0.279047	0.208	0.077	1
NDN	0.0580076	-0.380018	0.218	0.333	1
H2AFY	0.0582788	0.274956	0.454	0.282	1
PURB	0.0590647	0.352311	0.292	0.154	1
URM1	0.0591847	-0.354681	0.134	0.231	1
PKM	0.0593419	-0.25486	0.625	0.744	1
TMEM134	0.0598386	-0.257473	0.227	0.359	1
HSPA5	0.0600043	0.345096	0.731	0.59	1
ADSS	0.0601153	0.25168	0.352	0.179	1
C6orf106	0.0602167	0.28226	0.167	0.051	1
LARP1	0.0604732	0.25694	0.241	0.103	1
GTF3C3	0.060588	-0.297186	0.171	0.282	1
DSE	0.0611743	0.261015	0.13	0.026	1
C1QTNF7	0.0612637	0.281879	0.167	0.051	1
SDF2L1	0.0619478	0.310811	0.199	0.077	1
MLLT3	0.0621399	0.250651	0.278	0.128	1
KNG1	0.0621682	0.873385	0.259	0.128	1
IGF1	0.0631634	0.253664	0.125	0.026	1
PAWR	0.0634382	0.314208	0.597	0.436	1
MINDY2	0.0636204	-0.329725	0.421	0.513	1
SESTD1	0.0636349	-0.258125	0.111	0.205	1
TCF12	0.0636617	0.259732	0.292	0.154	1
IFT81	0.0637342	0.264049	0.204	0.077	1
ISOC2	0.064484	-0.30851	0.171	0.282	1
IFIT1	0.0645752	-0.310771	0.153	0.256	1
PEPD	0.0648711	-0.364353	0.343	0.436	1
CLIC4	0.0649919	0.35555	0.491	0.333	1
ZNF652	0.0650474	-0.269555	0.134	0.231	1
ARPC5	0.0655728	0.310721	0.694	0.59	1
PPP1R16A	0.0666191	-0.32394	0.111	0.205	1
MRPL57	0.0668962	-0.320838	0.477	0.564	1
EBAG9	0.0670149	0.291226	0.657	0.538	1
METAP2	0.0671927	-0.262632	0.519	0.641	1
CHD3	0.0673459	0.309288	0.273	0.128	1
TLN1	0.0675195	-0.26099	0.56	0.667	1
ADNP	0.0677631	0.293257	0.194	0.077	1
OARD1	0.0688728	-0.298585	0.153	0.256	1
RDH11	0.0693061	-0.294103	0.338	0.436	1
DDX18	0.0694049	-0.337234	0.551	0.59	1
SSR2	0.0694753	-0.304094	0.426	0.564	1
ANGPT2	0.0698001	-0.475576	0.093	0.179	1
TCEAL9	0.0705422	0.335405	0.745	0.641	1
ZNF503	0.0708748	-0.311142	0.306	0.436	1
TLK1	0.0710085	0.352007	0.426	0.282	1
HNRNPF	0.0711118	-0.259126	0.287	0.385	1
TUBA4A	0.072875	0.255672	0.236	0.103	1
OSBPL8	0.0734435	-0.282787	0.361	0.462	1
ACTA2	0.0738524	0.333376	0.194	0.077	1
RAB3IP	0.0739904	-0.305066	0.259	0.359	1
NIN	0.0742798	0.291094	0.231	0.103	1
ALPK2	0.075256	0.253298	0.19	0.077	1
BMPR2	0.0766731	0.358042	0.25	0.128	1
OAZ1	0.0770174	-0.266172	0.671	0.744	1
BORCS7	0.0771746	-0.31607	0.505	0.615	1
SNX17	0.0781734	-0.350288	0.153	0.256	1
KCNQ1OT1	0.0782407	0.287983	0.19	0.077	1
ADH5	0.0792695	0.311283	0.426	0.282	1
SULF1	0.0794397	-0.263995	0.241	0.359	1
VCL	0.0800214	0.275598	0.468	0.282	1
NOLC1	0.0805759	0.327754	0.375	0.231	1
BIRC3	0.0807518	-0.359382	0.454	0.513	1
PRDM2	0.0811135	0.26418	0.222	0.103	1
SMIM24	0.081131	-0.387355	0.181	0.282	1
IRF1	0.0820978	0.46534	0.481	0.359	1
LMNA	0.0821284	-0.273185	0.514	0.59	1
RAB29	0.0823271	-0.319414	0.185	0.282	1
NQO1	0.0829716	-0.287142	0.093	0.179	1
C9orf78	0.0835386	0.31128	0.44	0.308	1
RSRC2	0.0843482	0.257427	0.685	0.487	1
IL1R1	0.0858839	-0.257748	0.366	0.487	1
CREB1	0.0860664	0.252092	0.194	0.077	1
HMGCL	0.0863605	-0.263897	0.199	0.308	1
CRTAC1	0.0871274	-0.291385	0.153	0.256	1
RARRES2	0.0873713	-0.285396	0.435	0.538	1
WDR34	0.0877018	-0.334465	0.162	0.256	1
HIST1H1C	0.0878015	-0.630029	0.315	0.385	1
MYL12A	0.0900114	0.321887	0.773	0.718	1
MECOM	0.0908491	0.267445	0.148	0.051	1
SURF6	0.0910153	-0.263265	0.185	0.282	1
HLA-DMA	0.0914565	-0.261709	0.301	0.41	1
MRAS	0.0915619	-0.402502	0.167	0.256	1
SELENOW	0.091884	0.287871	0.699	0.59	1
ITGB8	0.0920989	0.345759	0.463	0.333	1
HEBP2	0.0928095	0.270802	0.644	0.462	1
FABP5	0.0929806	0.312494	0.153	0.051	1
NOL8	0.0931939	-0.251294	0.394	0.487	1
GRB2	0.0944087	-0.298623	0.546	0.615	1
NUPR1	0.0947773	0.329354	0.509	0.359	1
2020-09-10	0.0958676	0.308609	0.468	0.333	1
MDK	0.0964527	-0.322225	0.116	0.205	1
HTATSF1	0.097194	0.279203	0.542	0.385	1
WWP1	0.0976806	0.253574	0.181	0.077	1
ERP27	0.0978434	0.434748	0.69	0.615	1
ZMPSTE24	0.0981182	0.265315	0.343	0.205	1
MT-TL1	0.0983546	-0.376439	0.532	0.59	1
ZNF706	0.0988581	-0.257616	0.384	0.487	1
MRPL33	0.0998353	0.358211	0.681	0.641	1
MYEF2	0.10023	0.299093	0.5	0.359	1
GPRC5C	0.101076	-0.273007	0.259	0.359	1
PLA2G16	0.10127	-0.250903	0.606	0.744	1
RGS9	0.101995	0.2527	0.213	0.103	1
RGS5	0.102305	0.45742	0.394	0.256	1
GLUD1	0.102545	-0.280311	0.236	0.333	1
CAV1	0.104587	-0.25281	0.657	0.795	1
CLDN10	0.104979	0.347927	0.176	0.077	1
PDLIM5	0.105788	-0.316118	0.407	0.513	1
CCNT1	0.106295	-0.269817	0.12	0.205	1
FTH1P8	0.107138	-0.258587	0.102	0.179	1
CNDP2	0.107881	-0.274496	0.389	0.462	1
MRPL20	0.107978	-0.312343	0.421	0.513	1
ADIRF	0.108785	-0.293327	0.361	0.487	1
MMAB	0.109451	-0.285675	0.144	0.231	1
WDR43	0.109625	0.253776	0.301	0.179	1
BEST1	0.109644	-0.330841	0.079	0.154	1
MMP7	0.111006	0.315157	0.523	0.385	1
PON2	0.111607	0.289393	0.611	0.462	1
ZCCHC11	0.111809	0.290124	0.551	0.41	1
FBXO21	0.111926	-0.415734	0.532	0.59	1
IFNGR2	0.112277	-0.392608	0.241	0.333	1
ACAA1	0.112526	-0.259921	0.162	0.256	1
ALDH1A2	0.112713	-0.281287	0.366	0.462	1
MFAP1	0.11299	-0.276	0.273	0.359	1
SMARCC1	0.114516	0.251991	0.449	0.308	1
CADM1	0.11714	-0.250502	0.435	0.513	1
RGS4	0.117731	0.282488	0.208	0.103	1
EIF3H	0.118464	-0.30385	0.519	0.564	1
LINC00467	0.118798	-0.424948	0.102	0.179	1
LITAF	0.119383	-0.2835	0.648	0.692	1
TMEM219	0.119646	-0.316633	0.523	0.538	1
PFDN6	0.119838	-0.393721	0.278	0.359	1
DPH3	0.12038	-0.29875	0.157	0.256	1
ZNF106	0.12095	0.285407	0.366	0.231	1
WRB	0.123722	-0.258179	0.153	0.231	1
RPL3P4	0.124058	-0.25083	0.375	0.462	1
CXCL2	0.125155	0.357832	0.208	0.103	1
PLEKHA3	0.125822	-0.311649	0.222	0.308	1
MRPL54	0.126185	-0.277765	0.282	0.359	1
RBM17	0.126354	0.312634	0.509	0.359	1
GSTA1	0.126901	-0.438066	0.19	0.282	1
CRIPT	0.126988	-0.379203	0.125	0.205	1
RFLNB	0.12759	0.285646	0.204	0.103	1
RAB3B	0.127908	0.269345	0.171	0.077	1
PPP1R1A	0.12875	-0.378593	0.361	0.462	1
DECR2	0.130911	-0.262966	0.148	0.231	1
YEATS4	0.13272	-0.339343	0.171	0.256	1
SNX6	0.132833	0.279073	0.477	0.359	1
RBX1	0.134146	-0.303058	0.56	0.615	1
CLIP4	0.134617	0.266779	0.134	0.051	1
MAOA	0.136145	-0.348396	0.13	0.205	1
MRNIP	0.138125	-0.265745	0.102	0.179	1
MTND4P12	0.138757	0.410339	0.19	0.103	1
BTN3A2	0.139244	-0.367231	0.13	0.205	1
RRAD	0.140254	0.379855	0.338	0.231	1
TNFRSF12A	0.140396	0.460679	0.477	0.385	1
SLK	0.140442	-0.264737	0.644	0.692	1
ZBTB7C	0.140581	-0.31496	0.148	0.231	1
ZNF511	0.142229	-0.275762	0.088	0.154	1
SYNCRIP	0.142369	0.306439	0.477	0.359	1
SHISA4	0.143056	-0.320324	0.083	0.154	1
FUS	0.143483	0.309507	0.495	0.385	1
ARID4B	0.144392	0.270322	0.44	0.308	1
CCDC80	0.144904	0.352225	0.398	0.282	1
SORL1	0.147097	-0.255626	0.324	0.41	1
MRPL14	0.147584	0.285933	0.315	0.205	1
PTGDS	0.148961	-0.43188	0.454	0.538	1
PWP1	0.149039	-0.273572	0.394	0.487	1
ROBO1	0.151176	-0.278265	0.125	0.205	1
ITM2C	0.155888	-0.261312	0.648	0.718	1
MRPL2	0.157101	-0.253024	0.204	0.282	1
TSPAN31	0.158679	-0.265451	0.176	0.256	1
ZC3H7B	0.161226	0.273775	0.403	0.282	1
TAF1B	0.162206	-0.34295	0.259	0.333	1
TARS	0.16315	0.251483	0.31	0.205	1
C12orf75	0.16566	-0.36955	0.384	0.436	1
TMEM52B	0.166732	0.518767	0.213	0.128	1
RAB13	0.167562	-0.403897	0.667	0.692	1
B9D1	0.170378	-0.30969	0.134	0.205	1
EIF4B	0.173356	0.260533	0.62	0.538	1
ACSM2A	0.175608	-0.473272	0.167	0.231	1
AP5S1	0.177442	-0.25701	0.088	0.154	1
CLCN3	0.180672	-0.316822	0.292	0.359	1
TRMT10C	0.184997	-0.393913	0.255	0.308	1
CBWD1	0.188229	-0.304757	0.218	0.282	1
ARHGAP1	0.188608	-0.253721	0.157	0.231	1
GSTM3	0.190549	0.265915	0.329	0.231	1
NDUFS7	0.191785	-0.318244	0.375	0.436	1
LRPAP1	0.192243	-0.268305	0.556	0.615	1
ANGPTL3	0.19908	-0.260174	0.051	0.103	1
SOAT1	0.202838	-0.27114	0.093	0.154	1
TFDP2	0.20431	-0.307125	0.356	0.436	1
SLFN5	0.206276	0.269935	0.19	0.103	1
CA12	0.207259	0.329912	0.306	0.205	1
CLINT1	0.209711	0.258749	0.5	0.385	1
POR	0.213998	-0.325879	0.19	0.256	1
HCFC1R1	0.21886	0.252868	0.676	0.615	1
NRIP1	0.226236	0.255893	0.37	0.282	1
STAT3	0.226392	-0.271602	0.366	0.41	1
LACTB2	0.226723	-0.33198	0.167	0.231	1
CHCHD10	0.231333	-0.260487	0.435	0.462	1
TNFRSF11B	0.234585	0.405764	0.611	0.538	1
BHMT2	0.235007	-0.324187	0.278	0.359	1
SULT1C4	0.235243	-0.284186	0.056	0.103	1
THOC2	0.235844	-0.270573	0.509	0.564	1
COMMD6	0.235942	-0.32573	0.694	0.769	1
ERICH1	0.239194	-0.289804	0.171	0.231	1
SNRPN	0.239717	-0.257366	0.347	0.41	1
CMBL	0.240997	-0.316028	0.329	0.385	1
NCOA1	0.241164	-0.266528	0.148	0.205	1
AP000280.1	0.242854	-0.286532	0.125	0.179	1
SPAG7	0.24597	-0.273706	0.241	0.308	1
SUCLG1	0.253907	-0.257421	0.829	0.846	1
ATRAID	0.256964	-0.256774	0.444	0.487	1
SNX9	0.259663	-0.273398	0.167	0.231	1
COL8A1	0.262908	0.28688	0.292	0.205	1
FRS2	0.264183	-0.256385	0.079	0.128	1
NUFIP1	0.266935	-0.306501	0.171	0.231	1
MRPL55	0.276897	-0.331081	0.333	0.385	1
GLB1	0.282818	-0.360717	0.181	0.231	1
MAT2A	0.286114	-0.276194	0.13	0.179	1
WWOX	0.289109	-0.35153	0.125	0.179	1
STUB1	0.293576	-0.36943	0.287	0.333	1
LAMTOR1	0.29453	-0.257068	0.333	0.385	1
HSPA4	0.295672	-0.255096	0.324	0.359	1
KREMEN1	0.297415	-0.272363	0.06	0.103	1
PIFO	0.302011	-0.281409	0.125	0.179	1
BLOC1S1	0.311352	-0.318105	0.458	0.487	1
AHCYL1	0.321984	-0.263058	0.417	0.462	1
FSTL3	0.324988	-0.294919	0.106	0.154	1
TANK	0.326671	-0.255615	0.324	0.359	1
LRIF1	0.328321	-0.283634	0.153	0.205	1
RBCK1	0.341423	-0.255268	0.157	0.205	1
MTSS1	0.347172	-0.250188	0.315	0.359	1
MMP24OS	0.348397	-0.261044	0.292	0.333	1
CLDN16	0.365795	0.263133	0.157	0.103	1
SYPL1	0.373088	-0.286387	0.389	0.41	1
ACAA2	0.376925	-0.385231	0.366	0.359	1
LYPD1	0.391945	-0.264247	0.181	0.231	1
LYRM2	0.392756	-0.265039	0.403	0.436	1
CXCL14	0.406445	-0.255526	0.347	0.385	1
CXCL10	0.418945	-0.328515	0.069	0.103	1
PSMB9	0.424332	-0.261647	0.218	0.256	1
DZIP3	0.432266	-0.270787	0.148	0.179	1
PPP3CA	0.453227	-0.273606	0.306	0.333	1
SLC4A4	0.471788	-0.335095	0.176	0.205	1
PCM1	0.489562	0.251007	0.62	0.59	1
SNRPE	0.509531	-0.268656	0.56	0.564	1
FAM229B	0.52588	-0.274239	0.278	0.308	1
MTR	0.531563	-0.325773	0.296	0.308	1
EPB41L4A	0.537974	-0.295035	0.241	0.256	1
DPM2	0.540452	-0.398483	0.222	0.256	1
LGALS1	0.541486	-0.275685	0.491	0.513	1
ROCK2	0.578494	0.257931	0.509	0.462	1
NDUFAF2	0.587676	-0.250522	0.282	0.282	1
DEPP1	0.590234	-0.475561	0.333	0.333	1
SNAP47	0.612991	-0.287547	0.162	0.179	1
BRD4	0.635393	-0.426604	0.394	0.385	1
PTPRD	0.638864	-0.309697	0.162	0.179	1
MYL6B	0.672995	-0.259916	0.264	0.205	1
ALDH6A1	0.695504	-0.268267	0.315	0.308	1
MGP	0.69749	0.28639	0.699	0.692	1
PTDSS1	0.718495	-0.287007	0.116	0.128	1
HIST1H2AE	0.726256	-0.327009	0.181	0.179	1
IFI35	0.732889	-0.375913	0.264	0.256	1
NMT1	0.779478	-0.31296	0.38	0.333	1
RPN2	0.790126	-0.305012	0.463	0.436	1
ATP1A1	0.800072	0.28902	0.514	0.513	1
TMEM147	0.82691	-0.262336	0.454	0.41	1
GID8	0.830133	-0.25584	0.185	0.179	1
PSMA3	0.845403	-0.255435	0.435	0.385	1
WAPL	0.865156	-0.262564	0.25	0.231	1
FSTL1	0.943213	-0.275023	0.273	0.231	1
ITPA	0.979637	-0.301256	0.199	0.179	1

## Sheet: POD
gene_id	p_val	avg_logFC	pct.1	pct.2	p_val_adj
XIST	4.46e-30	1.13545	0.444	0	1.06e-25
MTRNR2L1	1.52e-25	1.08732	0.519	0.018	3.6e-21
MT-RNR1	2.65e-15	1.35325	1	1	6.27e-11
LINC01578	2.44e-13	1.0474	0.556	0.085	5.78e-09
NGF	3.64e-13	0.388812	0.185	0	8.61e-09
UBC	9.56e-13	-1.19335	0.778	0.975	2.26e-08
SLC12A1	1.86e-11	0.693656	0.407	0.046	4.39e-07
MT-TP	4.63e-11	1.20489	0.852	0.365	1.1e-06
NPHS2	1.3e-10	-0.917436	1	1	3.07e-06
MALAT1	2.73e-09	0.742418	1	1	6.46e-05
RRAD	1.48e-08	0.331576	0.148	0.004	0.000349689
KLRB1	2.03e-08	0.404448	0.111	0	0.000481022
AEBP1	2.03e-08	0.283036	0.111	0	0.000481022
EDIL3	2.03e-08	0.265518	0.111	0	0.000481022
ID4	2.04e-08	0.52787	0.37	0.057	0.000483238
VIM	2.61e-08	-0.78242	0.963	0.993	0.000616999
HTRA1	2.9e-08	0.745446	1	0.908	0.000686519
AC106818.1	4.63e-08	0.522918	0.222	0.018	0.00109605
MT-RNR2	6.7e-08	0.628631	1	1	0.001585
MT-ND4L	9.48e-08	0.768364	1	0.936	0.00224254
UMOD	1.36e-07	1.01201	0.481	0.121	0.00322244
SPARC	1.56e-07	-0.769438	0.889	0.979	0.00368161
CLDN4	1.94e-07	0.598517	0.296	0.043	0.00458794
ANXA2	2.32e-07	-0.728926	0.963	0.993	0.00549933
ACTB	2.73e-07	-0.565337	1	1	0.00646959
B2M	3.21e-07	-0.606375	1	1	0.00760418
NFKBIZ	3.73e-07	0.614549	0.259	0.032	0.00881821
GPX3	3.78e-07	-1.54266	0.593	0.908	0.00893667
SLC16A12	5.61e-07	0.310831	0.185	0.014	0.0132811
CLIC5	6.3e-07	-0.501442	1	1	0.014895
SOST	6.64e-07	-1.00986	0.481	0.908	0.0157161
FXYD4	8.93e-07	0.827512	0.222	0.025	0.0211347
MT-CO1	1.06e-06	0.412439	1	1	0.0250411
PRSS23	1.45e-06	0.554602	0.259	0.039	0.0341957
HES1	1.58e-06	0.891894	0.852	0.504	0.0374157
TNNI1	1.65e-06	-0.866642	0.519	0.883	0.038963
GRK6	2.27e-06	0.291916	0.111	0.004	0.0538108
MBNL2	2.45e-06	0.508834	0.593	0.188	0.0580092
ID2	4.5e-06	0.699393	0.63	0.227	0.106445
CXCL2	4.56e-06	0.557686	0.148	0.011	0.107951
PSAP	4.73e-06	-0.669443	0.778	0.975	0.112009
HLA-B	5.91e-06	-0.890864	0.593	0.837	0.139937
ACTG1	9.25e-06	-0.533353	0.926	0.989	0.218828
BIRC3	1.04e-05	0.422761	0.185	0.021	0.247164
MT1X	1.2e-05	-1.1162	0.444	0.745	0.282992
GADD45A	1.22e-05	-0.659773	0.852	0.961	0.28944
RBM3	1.81e-05	-0.978466	0.111	0.571	0.427992
HLA-E	2e-05	-0.678877	0.741	0.947	0.473922
IGF1	2.11e-05	0.50918	0.296	0.06	0.498501
EIF1AY	2.31e-05	-0.961342	0	0.436	0.545882
UACA	2.57e-05	0.577356	0.963	0.957	0.607702
CYP7B1	2.67e-05	0.519705	0.185	0.025	0.6314
MT-ND5	2.98e-05	0.422636	1	0.996	0.70591
IGFBP2	3.34e-05	0.695775	0.926	0.787	0.791241
UBL5P2	3.93e-05	0.308641	0.111	0.007	0.930576
C1R	4.02e-05	-0.793473	0.444	0.762	0.951818
MT-ND2	4.13e-05	0.353205	1	1	0.976205
BRI3	5.67e-05	0.546692	0.667	0.309	1
SLC9A3R2	5.79e-05	0.5394	0.593	0.234	1
SRP14	6.01e-05	0.37643	1	0.947	1
PCOLCE2	6.87e-05	0.640112	1	0.961	1
KLK6	6.89e-05	-0.827654	0.296	0.667	1
THY1	7.1e-05	0.590118	0.259	0.053	1
CIRBP	7.33e-05	-0.749711	0.481	0.798	1
DCN	7.48e-05	0.474506	1	0.996	1
ID1	7.53e-05	0.395371	0.296	0.067	1
SEMA3B	7.55e-05	-0.758091	0.222	0.628	1
NES	7.55e-05	-0.537001	0.889	0.982	1
MTRR	7.67e-05	0.250004	0.222	0.039	1
RPS4Y1	9.23e-05	-0.800932	0	0.39	1
ELF3	9.65e-05	0.446087	0.185	0.028	1
H3F3B	9.91e-05	-0.455707	1	0.996	1
C2orf40	0.000101779	0.577227	0.185	0.028	1
GSN	0.000105808	-0.56739	0.185	0.582	1
PTMA	0.000115948	-0.333504	1	1	1
MT-TS2	0.000117175	0.456279	0.37	0.106	1
PRKAR2B	0.000120008	0.604752	0.63	0.294	1
ZNF503	0.000121932	-0.862289	0.111	0.504	1
TGFBR3	0.000124977	-0.584816	0.63	0.894	1
TACSTD2	0.000129205	0.250095	0.185	0.028	1
RPL9P9	0.000131236	0.468959	0.667	0.34	1
EEF1A1	0.000143773	-0.48756	0.815	0.989	1
CCDC146	0.000144428	0.291437	0.148	0.018	1
CDKN1B	0.000148921	-0.727599	0.259	0.67	1
PRKAR1A	0.000154267	-0.80467	0.111	0.489	1
RTN4	0.000154954	-0.569477	0.444	0.89	1
IQGAP2	0.00016541	-0.490478	0.889	0.968	1
AL450405.1	0.000169263	-0.835532	0	0.369	1
MT-TV	0.000189208	0.634815	0.778	0.496	1
CTSV	0.000209122	-0.824631	0.222	0.606	1
PAK1	0.000222753	-0.776403	0.259	0.631	1
CHI3L1	0.000233984	-1.19508	0.407	0.667	1
ST3GAL6	0.000238744	-0.710375	0.519	0.748	1
VAMP2	0.000250094	-0.596305	0.741	0.862	1
TUBA1B	0.000264217	-0.589593	0.704	0.851	1
EPB41L4A	0.000267175	0.328841	0.296	0.078	1
EIF4A2	0.000268392	-0.716979	0.333	0.645	1
ALDOB	0.000277679	-1.50258	0.222	0.592	1
VKORC1	0.000296389	-0.634033	0.667	0.84	1
AC092803.2	0.000297159	0.338955	0.111	0.011	1
NDRG2	0.000298148	-0.675663	0.148	0.592	1
TEX30	0.000308979	0.349304	0.148	0.021	1
ZNRD1	0.000326964	0.309028	0.148	0.021	1
MPP5	0.000328818	-0.557534	0.741	0.943	1
HSPA8	0.000333216	-0.703012	0.259	0.656	1
SLC38A2	0.000348699	0.387618	0.37	0.124	1
ARHGAP17	0.000355787	0.256902	0.148	0.021	1
CLDN16	0.000386972	0.412065	0.148	0.021	1
POLA2	0.000396485	-0.840865	0.037	0.379	1
MT-ND4	0.0004413	0.25842	1	1	1
MT-CYB	0.000464317	0.254407	1	1	1
ATF3	0.000497277	0.694617	0.333	0.113	1
ISCU	0.000514776	0.497532	0.741	0.461	1
HYOU1	0.000531089	0.439642	0.333	0.106	1
PTPRO	0.000542275	-0.43144	0.963	0.957	1
SBSPON	0.000573702	-0.589658	0.407	0.777	1
EGOT	0.000590131	0.275322	0.185	0.035	1
FBXO18	0.000630957	0.342905	0.185	0.035	1
PSMB6	0.000662722	-0.665282	0.333	0.656	1
SELENOW	0.00066299	0.633905	0.852	0.589	1
TUBB	0.000668621	-0.663441	0.333	0.628	1
MBTPS1	0.000674359	0.424609	0.37	0.135	1
YWHAQ	0.000722921	-0.637683	0.259	0.578	1
RARRES2	0.000731912	-0.59479	0.556	0.819	1
HIVEP1	0.000752674	0.414325	0.222	0.053	1
IQCB1	0.000766499	0.304937	0.148	0.025	1
BEND6	0.000809725	0.461036	0.333	0.11	1
CEBPG	0.000827155	0.475749	0.148	0.025	1
BST2	0.000847417	-0.490118	0.778	0.933	1
NOV	0.000860765	0.416352	0.185	0.039	1
DEFB1	0.00093254	0.462712	0.815	0.514	1
CXCL3	0.0011195	0.582141	0.111	0.014	1
BRD7	0.00113749	0.455012	0.481	0.22	1
SLC9A3R1	0.00116127	-0.655704	0.148	0.482	1
SMIM3	0.0012276	0.283563	0.111	0.014	1
IER3	0.00124014	0.693031	0.37	0.16	1
MRFAP1	0.00127546	-0.668939	0.222	0.535	1
SRGAP2C	0.00127905	-0.809043	0.407	0.656	1
HSP90B1	0.00128776	0.320343	1	0.989	1
MYL9	0.0012978	-0.359451	1	0.972	1
TCP11L1	0.00134526	0.316486	0.111	0.014	1
MYL6	0.00137634	-0.364204	0.963	0.972	1
MT1E	0.00141975	-0.593074	0.778	0.865	1
STAT1	0.0014255	-0.708146	0.37	0.677	1
MT-TM	0.00147237	0.359753	0.444	0.177	1
CD59	0.00150731	-0.466862	0.519	0.801	1
WT1	0.00152682	-0.651652	0.296	0.649	1
AIF1	0.00156516	-0.374196	0.963	0.996	1
SVIL	0.00164913	0.45942	0.296	0.096	1
PFN2	0.00165167	-0.619357	0.185	0.528	1
TEAD1	0.00165546	-0.733799	0.111	0.429	1
PGK1	0.00166358	-0.590632	0.333	0.617	1
CDV3	0.00166564	0.603904	0.556	0.287	1
EIF2B2	0.00171506	0.373795	0.185	0.043	1
TXNIP	0.00178704	-0.569451	0.63	0.78	1
MT-TD	0.00179477	0.289886	0.148	0.028	1
PDLIM2	0.00183831	-0.498224	0.704	0.901	1
CTSC	0.00185341	0.342091	0.185	0.043	1
PA2G4	0.00193315	-0.610492	0.259	0.574	1
ENPEP	0.00211382	-0.503341	0.704	0.855	1
ANKRD17	0.00212919	-0.494013	0.074	0.379	1
CSRP1	0.00215463	-0.549935	0.222	0.567	1
CYB5R3	0.00220716	-0.562613	0.185	0.518	1
SAMD11	0.00220756	-0.550057	0.296	0.617	1
MAL2	0.00223947	-0.603802	0.37	0.66	1
FGF1	0.00225741	-0.327869	1	0.993	1
IFI16	0.00227969	0.405446	0.296	0.103	1
NDUFV3	0.00230252	-0.611303	0.074	0.351	1
CLTC	0.00239412	-0.582687	0.037	0.333	1
GLUL	0.00241518	-0.60007	0	0.266	1
IFI27	0.00242209	-0.910201	0.037	0.319	1
DUSP6	0.00246228	0.296742	0.148	0.028	1
S100A10	0.002528	0.522757	0.741	0.543	1
ZNF204P	0.00258342	0.340985	0.185	0.046	1
PDIA6	0.00266	0.352151	0.852	0.699	1
P4HA1	0.00277056	0.349585	0.333	0.121	1
SNRNP48	0.00277905	0.316475	0.185	0.046	1
KLF7	0.00285826	-0.574526	0	0.259	1
SPATS2L	0.00287743	0.433182	0.926	0.801	1
MYO1B	0.00291349	-0.573271	0.407	0.656	1
ASAH1	0.00292405	-0.564472	0.148	0.447	1
SEC13	0.00292545	-0.591825	0.074	0.358	1
IQCH-AS1	0.00293455	0.396566	0.185	0.046	1
AC092813.2	0.00301882	-0.497063	0.852	0.926	1
AK3	0.00306495	-0.529626	0.222	0.567	1
POGLUT1	0.00310738	-0.589856	0	0.255	1
MAFB	0.00328175	-0.492864	0.815	0.876	1
SLX4IP	0.00329912	0.275488	0.111	0.018	1
PCNP	0.00332273	-0.589951	0.111	0.401	1
CKB	0.00333426	-0.597936	0.185	0.479	1
RERG	0.00339961	-0.612746	0.222	0.528	1
B9D1	0.00343003	-0.681001	0.111	0.404	1
QPRT	0.0034708	-0.780351	0.222	0.482	1
ZBTB18	0.00353229	0.270792	0.148	0.032	1
SOX2-OT	0.00376249	0.293281	0.111	0.018	1
CHM	0.00378432	0.308824	0.259	0.085	1
RNF11	0.00379354	-0.634652	0.111	0.39	1
RHOA	0.00385944	-0.479995	0.519	0.798	1
SLC48A1	0.00386855	-0.571002	0.185	0.496	1
CFAP45	0.0038896	-0.522964	0.407	0.702	1
PDE4DIP	0.00402169	-0.59473	0.148	0.418	1
MYL12A	0.00405043	0.412495	0.889	0.823	1
SKIL	0.00413611	0.488579	0.333	0.131	1
KHDRBS1	0.00414276	-0.628135	0.333	0.553	1
CCL28	0.00416609	0.287273	0.148	0.032	1
ATP1B1	0.0042255	0.342233	0.926	0.809	1
ZCCHC6	0.00429385	0.383173	0.296	0.106	1
SDC4	0.00432801	-0.592163	0.259	0.525	1
LMO4	0.00433886	0.323266	0.481	0.241	1
PODXL	0.0044025	-0.291821	1	1	1
IFI6	0.00442785	-0.505041	0.407	0.738	1
NUPR1	0.0044387	0.387639	0.667	0.411	1
FMC1	0.00447316	0.292521	0.407	0.174	1
CAP2	0.00450584	0.337828	0.185	0.05	1
CPXM1	0.00457503	-0.586442	0.037	0.305	1
SRGAP2B	0.00457517	-0.595158	0.148	0.45	1
MT-TY	0.00458293	0.343963	0.185	0.05	1
SULT1A1	0.00467401	-0.550412	0.111	0.394	1
APPBP2	0.004872	-0.55739	0.037	0.28	1
ZNRF3	0.00495805	-0.530029	0.111	0.397	1
PABPC1	0.00509546	-0.32266	0.704	0.95	1
IFITM3	0.00549002	-0.324341	1	0.972	1
PMEPA1	0.00551041	-0.543673	0.407	0.656	1
GDF15	0.0055256	0.689286	0.259	0.096	1
MECP2	0.00558387	0.464745	0.37	0.163	1
ATP5F1A	0.00561475	-0.599422	0.481	0.67	1
PTPRA	0.00564504	0.506917	0.556	0.33	1
SGK1	0.00565566	-0.718833	0.185	0.443	1
CD46	0.00575588	0.390967	0.852	0.628	1
TNNT2	0.00579803	-0.423109	0.852	0.95	1
ARHGEF3	0.00611176	-0.517616	0.37	0.645	1
SPIRE1	0.00635271	0.293701	0.37	0.16	1
PPA1	0.00640996	-0.591558	0.333	0.585	1
PTH1R	0.00652581	-0.490574	0.667	0.812	1
MT2A	0.00663029	-0.530347	0.926	0.901	1
STS	0.00682602	0.275629	0.111	0.021	1
RBM22	0.00700648	-0.475804	0	0.22	1
SHISA2	0.00700648	-0.485008	0	0.22	1
TSPAN3	0.0070358	-0.478247	0.407	0.66	1
FIS1	0.00704407	-0.512641	0.37	0.638	1
SLC25A6	0.0070558	-0.50314	0.407	0.652	1
RFX7	0.00720107	0.265052	0.148	0.035	1
FYN	0.00723975	0.409614	0.481	0.266	1
SPOCK2	0.00734857	-0.408553	0.778	0.897	1
HSPA5	0.0073528	0.410142	0.778	0.699	1
EPB41	0.00748101	0.31587	0.222	0.074	1
SCAND1	0.00751332	-0.545342	0.185	0.468	1
TRIP6	0.00758358	-0.528361	0	0.216	1
TBCB	0.00760165	-0.464057	0.556	0.738	1
RPS19	0.00773068	0.39101	0.852	0.745	1
SRSF2	0.00775638	-0.550944	0.111	0.365	1
ARL8B	0.00778118	0.333815	0.333	0.142	1
HLA-A	0.00797421	-0.354842	0.778	0.947	1
FAM20C	0.008012	-0.599526	0.111	0.358	1
C14orf37	0.00809097	-0.3164	0.926	0.982	1
TFPI	0.00814471	0.418884	0.259	0.096	1
TRIB2	0.00839027	-0.555895	0.222	0.479	1
METAP2	0.00849879	-0.571543	0.296	0.546	1
GHITM	0.00878131	-0.515237	0.296	0.553	1
SLC16A10	0.00887443	-0.495822	0	0.209	1
MBIP	0.00890918	0.457351	0.296	0.124	1
TRAPPC10	0.00892821	0.258751	0.222	0.074	1
NDUFAB1	0.00902387	-0.500003	0.37	0.592	1
CNPY2	0.00919101	0.330775	0.444	0.234	1
RIPOR1	0.00927223	-0.552604	0.333	0.578	1
KRR1	0.00929824	-0.50042	0.111	0.362	1
AIF1L	0.00938021	-0.367114	0.519	0.766	1
ORMDL1	0.00938155	0.503121	0.333	0.16	1
TPPP3	0.0095556	-0.439847	0.852	0.922	1
NDUFS1	0.00966817	-0.656602	0.111	0.323	1
MAP1B	0.0097112	-0.436639	0.519	0.759	1
CDC42	0.00980594	-0.400092	0.778	0.858	1
L3MBTL3	0.00988425	-0.563079	0.074	0.291	1
ST6GALNAC3	0.00990039	-0.543925	0.407	0.606	1
CNOT2	0.0103452	0.364327	0.444	0.227	1
GPHN	0.0103701	-0.450303	0	0.202	1
HLA-F	0.0105772	-0.510626	0.037	0.248	1
AC009480.1	0.0107573	0.279028	0.185	0.057	1
ZNF711	0.0108008	0.300886	0.148	0.039	1
SF3B2	0.0112357	-0.528206	0.296	0.539	1
BORCS7	0.0114041	-0.535639	0.556	0.734	1
RPN1	0.0114355	-0.409167	0.185	0.465	1
PDE6D	0.0115816	0.275393	0.185	0.057	1
NFIB	0.0116634	0.253668	0.259	0.099	1
RPL38	0.011843	0.340602	0.852	0.777	1
TSPAN5	0.011869	0.3751	0.37	0.184	1
CSGALNACT2	0.0120449	0.332731	0.222	0.078	1
DDX3Y	0.0121008	-0.419737	0	0.195	1
FUNDC1	0.0123935	0.437713	0.333	0.163	1
TBCA	0.0125301	-0.415302	0.556	0.73	1
CA10	0.0125461	-0.555776	0.074	0.291	1
PLA2G16	0.0126216	-0.557579	0.259	0.5	1
RPN2	0.0127387	-0.465951	0.519	0.699	1
C12orf10	0.0130651	-0.435005	0	0.191	1
TSN	0.0130651	-0.402766	0	0.191	1
F5	0.0130651	-0.426913	0	0.191	1
GAPDH	0.0132505	-0.3299	0.963	0.957	1
SRSF11	0.0132582	-0.4915	0.444	0.642	1
UBE2N	0.0137208	-0.449504	0.074	0.298	1
PCMT1	0.0139677	-0.493208	0.185	0.44	1
PTP4A2	0.0140641	-0.55451	0.185	0.397	1
ATIC	0.0141015	-0.440091	0	0.188	1
FOXO3	0.0141015	-0.450743	0	0.188	1
PKP4	0.0141167	0.393464	0.481	0.273	1
ARF6	0.0144539	-0.525359	0.37	0.582	1
C6orf62	0.0145218	-0.498422	0.111	0.351	1
HLA-C	0.0145933	-0.412956	0.741	0.883	1
CRYAB	0.0148062	-0.395995	0.704	0.901	1
PDIA3	0.0148384	0.264065	0.926	0.982	1
PRDX3	0.0152737	-0.340417	0.185	0.45	1
PCBP2	0.0154349	-0.446875	0.296	0.571	1
ARL5B	0.0156863	0.286315	0.111	0.025	1
TMEM150C	0.015897	-0.370349	0.667	0.851	1
AC027559.1	0.0159289	0.289985	0.148	0.043	1
RAC1	0.0161933	-0.349122	0.778	0.89	1
SDC2	0.0161948	-0.314563	0.333	0.553	1
FTL	0.0162348	-0.755349	1	0.989	1
AKT2	0.0164116	-0.394785	0	0.181	1
GRK5	0.0164116	-0.370602	0	0.181	1
N4BP2	0.0164116	-0.462007	0	0.181	1
FGGY	0.0164491	0.288964	0.148	0.043	1
CCAR1	0.0164839	0.353691	0.333	0.156	1
KMT2A	0.0165879	0.417539	0.444	0.252	1
CRYBG3	0.0167147	0.262175	0.148	0.043	1
SLC5A3	0.016879	0.347326	0.259	0.106	1
RPS6KA2	0.0169519	-0.494911	0.037	0.227	1
COPS4	0.0169519	-0.497486	0.037	0.227	1
CNDP2	0.0169519	-0.513018	0.037	0.227	1
AC099336.2	0.0169841	0.319821	0.148	0.043	1
UQCRC2	0.0170507	-0.452394	0.111	0.337	1
ACAA2	0.0170896	-0.407593	0.111	0.351	1
CR1	0.0173844	-0.424906	0.296	0.567	1
TRPC6	0.0175111	-0.506544	0.074	0.28	1
PLS3	0.0176092	-0.485215	0.333	0.564	1
RFLNB	0.0176291	0.355669	0.185	0.064	1
GPATCH4	0.0176965	-0.430098	0	0.177	1
RPS27	0.0177449	0.275633	1	0.989	1
PARD6G	0.0178888	-0.370424	0.074	0.301	1
GLUD1	0.0179016	-0.39768	0.037	0.241	1
RPS11	0.0180566	-0.483678	0.593	0.766	1
DLC1	0.0181215	-0.457491	0.037	0.234	1
SAFB2	0.0182203	-0.430909	0.037	0.23	1
TPM4	0.0182383	0.362281	0.926	0.823	1
LOXL1	0.0182445	-0.525284	0.148	0.397	1
DDT	0.0186061	-0.572768	0.222	0.422	1
CPNE3	0.0187686	-0.379275	0.407	0.628	1
PFDN5	0.018979	0.311661	0.852	0.695	1
PTMAP5	0.0190151	-0.51057	0.259	0.479	1
NRIP2	0.0190339	-0.471103	0.037	0.223	1
OLFML2A	0.0190764	-0.41925	0	0.174	1
PTPRG	0.0190764	-0.339496	0	0.174	1
APOL6	0.0190764	-0.407808	0	0.174	1
ZCCHC9	0.0191829	0.40959	0.296	0.138	1
TCEAL8	0.0194835	-0.467614	0.296	0.518	1
RAB5A	0.0195465	-0.417719	0.074	0.284	1
ANAPC16	0.0197509	-0.275331	0.741	0.844	1
SCAF11	0.0198284	0.31566	0.815	0.638	1
LMO7	0.0198469	-0.369555	0.222	0.454	1
SMIM14	0.0198713	-0.452441	0.111	0.34	1
PAQR7	0.0199497	-0.495746	0.037	0.22	1
PPP4R3A	0.0199726	0.387284	0.222	0.089	1
HMGB3	0.0200532	0.303905	0.259	0.106	1
NDUFA8	0.0202508	-0.379705	0.111	0.323	1
GYG1	0.0203249	-0.53244	0.074	0.259	1
G0S2	0.0204026	-0.487168	0.333	0.571	1
CPT1A	0.0205539	0.285432	0.37	0.188	1
PEBP1	0.0205713	-0.303351	0.889	0.961	1
CSNK2B	0.0208322	-0.504235	0.148	0.358	1
TYRO3	0.0208898	-0.424335	0.333	0.56	1
AC008264.2	0.0208907	-0.453677	0.037	0.234	1
SSRP1	0.0211678	-0.453576	0.296	0.528	1
SERF2	0.0212343	0.276019	1	0.915	1
SBF2	0.0213966	0.371579	0.222	0.089	1
SET	0.0214013	-0.41263	0.556	0.77	1
SRGAP1	0.0214376	-0.372483	0.444	0.645	1
TSR3	0.0217306	-0.41738	0.037	0.23	1
ANAPC5	0.0218625	0.385569	0.37	0.202	1
UFD1	0.0219375	-0.447639	0.111	0.326	1
CTNNBIP1	0.0221118	-0.475666	0.111	0.323	1
PDPN	0.0224537	0.39602	0.259	0.11	1
BHMT2	0.0227582	-0.633029	0.037	0.216	1
NDUFS2	0.023057	-0.514962	0.185	0.379	1
TWISTNB	0.0231457	0.35359	0.37	0.184	1
LMNA	0.0233479	-0.435605	0.222	0.433	1
DLD	0.0234421	-0.439801	0.037	0.213	1
SUB1	0.0234694	-0.367951	0.556	0.716	1
IFNAR1	0.0235324	0.253723	0.63	0.401	1
NDFIP1	0.0236183	-0.484505	0.37	0.546	1
UBE2G2	0.0236671	-0.575354	0.37	0.532	1
CAP1	0.0237245	-0.327263	0.222	0.493	1
MLLT6	0.0238536	-0.352295	0	0.163	1
VSIG8	0.0238536	-0.406858	0	0.163	1
SLC45A1	0.0238536	-0.415883	0	0.163	1
RNF220	0.0239002	-0.363751	0.63	0.812	1
FBXO3	0.02449	-0.391571	0.037	0.223	1
CCDC91	0.024635	-0.32081	0.444	0.716	1
HNRNPH1	0.024705	0.320365	0.407	0.223	1
ZNF808	0.0248164	0.329238	0.111	0.028	1
SOCS4	0.0250359	0.30689	0.333	0.167	1
ERH	0.0253666	-0.41099	0.444	0.613	1
AP1M2	0.0253971	-0.514099	0.037	0.209	1
UBE2Q1	0.0255628	0.28534	0.37	0.188	1
ERI3	0.02557	-0.345368	0.037	0.227	1
PRR13	0.0256496	-0.446169	0.222	0.422	1
NXPH2	0.0256712	0.322939	0.148	0.046	1
LINC00839	0.0256754	-0.402782	0.556	0.73	1
TMEM200C	0.025684	-0.41999	0	0.16	1
KANK1	0.025684	-0.364764	0	0.16	1
FLYWCH2	0.025684	-0.40884	0	0.16	1
WISP3	0.0256841	-0.375116	0	0.16	1
GSTA4	0.0259221	-0.356561	0.148	0.379	1
RPSA	0.0259323	-0.427687	0.37	0.592	1
NOP56	0.0260483	-0.468678	0.148	0.355	1
P4HB	0.0262656	-0.291022	0.185	0.418	1
DDOST	0.0263714	-0.372318	0.037	0.223	1
PPP2CA	0.0263953	-0.456665	0.074	0.248	1
SERPING1	0.0265449	-0.487702	0.259	0.443	1
HSBP1L1	0.026576	-0.452511	0.185	0.397	1
CSDE1	0.0266169	-0.385554	0.556	0.741	1
ACTN4	0.0267462	-0.310734	0.815	0.911	1
RSBN1L	0.0269219	-0.477502	0.111	0.305	1
COPS9	0.0273009	-0.463478	0.481	0.677	1
CTSD	0.0273096	-0.477921	0.519	0.677	1
SUCLG1	0.0274243	-0.473564	0.704	0.837	1
NR1D2	0.0275052	-0.474561	0.037	0.206	1
OSTF1	0.0276477	-0.359185	0	0.156	1
MRPL37	0.0276477	-0.370726	0	0.156	1
ACSM2B	0.0276477	-0.542821	0	0.156	1
PHF20L1	0.0276969	0.279169	0.481	0.277	1
PPP1CB	0.0279102	-0.416068	0.111	0.305	1
CD99	0.0280005	-0.44621	0.185	0.394	1
EIF3K	0.028171	-0.483469	0.407	0.596	1
IGFBP4	0.0283009	-0.507433	0.111	0.298	1
TPR	0.0285903	-0.390483	0.481	0.67	1
NEBL	0.0287883	-0.496174	0.444	0.684	1
PGD	0.0291424	-0.498965	0.074	0.245	1
PPIA	0.0292759	-0.269513	0.852	0.929	1
ATP6V1A	0.0292794	-0.454758	0.074	0.255	1
SOX4	0.0292962	0.528395	0.333	0.163	1
ZCCHC7	0.0293546	0.383536	0.222	0.096	1
TPM1	0.0294081	0.487957	0.333	0.177	1
PSMB3	0.0296529	-0.446797	0.259	0.45	1
IARS	0.0297537	-0.32516	0	0.152	1
AC092747.4	0.0297537	-0.325456	0	0.152	1
NAGLU	0.0297537	-0.342048	0	0.152	1
RBBP4	0.0297655	-0.312882	0.074	0.287	1
PRDX6	0.0297912	-0.338655	0.741	0.844	1
AK4	0.0300071	-0.483977	0.037	0.209	1
CES2	0.0301038	-0.388361	0.037	0.22	1
ASNSD1	0.0302795	-0.422378	0.037	0.202	1
PPP1R8	0.0304646	0.33183	0.222	0.092	1
MTCO1P12	0.0306869	0.307061	0.593	0.408	1
CTSB	0.0309167	-0.507493	0.407	0.603	1
GULP1	0.0310327	-0.461174	0.296	0.489	1
IER2	0.0310485	0.473695	0.444	0.277	1
TUBA1A	0.0312287	-0.488057	0.259	0.436	1
ACSM2A	0.0312662	-0.594635	0.037	0.209	1
MAGT1	0.0313313	-0.493682	0.185	0.383	1
TMUB2	0.0313639	0.264005	0.148	0.05	1
ADRM1	0.031418	-0.498597	0.074	0.241	1
PLOD2	0.0314959	-0.425101	0.111	0.319	1
TMEM30A	0.0315199	-0.408904	0.185	0.397	1
PNRC1	0.0318165	0.283403	0.704	0.628	1
NME3	0.0318223	-0.519126	0.185	0.365	1
KDELR2	0.0318392	-0.386546	0.074	0.262	1
AIMP2	0.0320121	-0.321649	0	0.149	1
CERS2	0.0320121	-0.318101	0	0.149	1
BAIAP2	0.0320121	-0.321269	0	0.149	1
RAPGEF3	0.0320121	-0.350513	0	0.149	1
PLEC	0.0320121	-0.391957	0	0.149	1
CYP1B1	0.032186	-0.499956	0.148	0.344	1
CAPN2	0.032239	-0.37392	0.481	0.695	1
IGF1R	0.0323059	-0.356946	0.037	0.209	1
CAPNS1	0.0324258	-0.433824	0.37	0.567	1
FABP1	0.0327674	-0.63017	0.037	0.199	1
HIPK2	0.0327784	0.383272	0.889	0.766	1
GABARAPL1	0.0328694	-0.447049	0.111	0.305	1
ZDHHC6	0.0331071	-0.296244	0.556	0.794	1
RHOB	0.0331712	-0.384256	0.037	0.202	1
RPS26	0.0333537	-0.330888	0.778	0.897	1
SYNJ2BP	0.0335562	-0.383214	0.185	0.418	1
PC	0.0335931	-0.402567	0.037	0.199	1
PSMB9	0.0335977	-0.530858	0.111	0.298	1
RHBDD2	0.0337848	-0.399921	0.074	0.252	1
PPP2R1A	0.033945	-0.416626	0.148	0.351	1
FAM210B	0.0341018	0.259949	0.37	0.199	1
MUT	0.0344337	-0.301182	0	0.145	1
KIAA0040	0.0344623	-0.441575	0.296	0.482	1
SH3BP5	0.0344798	-0.484236	0.259	0.457	1
FUOM	0.0345308	-0.421808	0.074	0.248	1
PHACTR3	0.034865	-0.428976	0.037	0.195	1
ZCCHC10	0.0350375	0.525192	0.296	0.16	1
REXO2	0.035117	-0.474987	0.444	0.592	1
COA5	0.0354476	-0.421599	0.037	0.195	1
DCTD	0.0355509	-0.369908	0.074	0.266	1
CCNI	0.0358773	-0.308614	0.556	0.759	1
TPT1	0.0359604	-0.325518	0.852	0.933	1
CSNK2A3	0.0362091	0.251937	0.222	0.096	1
ESD	0.0366818	-0.308082	0.296	0.535	1
SRP68	0.03703	-0.301812	0	0.142	1
BET1	0.03703	-0.302204	0	0.142	1
APLP1	0.03703	-0.309962	0	0.142	1
KIAA0355	0.03703	-0.327666	0	0.142	1
XAF1	0.03703	-0.332805	0	0.142	1
TGS1	0.03703	-0.338778	0	0.142	1
MAOA	0.03703	-0.342663	0	0.142	1
FRS2	0.03703	-0.352298	0	0.142	1
CRELD1	0.03703	-0.355264	0	0.142	1
WIPF2	0.03703	-0.37676	0	0.142	1
KLK7	0.0370631	-0.384484	0.741	0.855	1
IARS2	0.0371907	-0.349614	0.037	0.202	1
RMDN1	0.0373775	0.285082	0.296	0.145	1
PWP1	0.0374247	-0.45818	0.111	0.301	1
GATM	0.037605	-0.68823	0.111	0.287	1
SCCPDH	0.0377067	-0.445498	0.037	0.191	1
HSPB8	0.0377579	-0.358392	0.074	0.259	1
CNOT7	0.037804	-0.394492	0.148	0.337	1
SBDS	0.0380449	0.272021	0.778	0.631	1
ANXA4	0.0382878	-0.363403	0.074	0.241	1
AKAP12	0.0383221	0.811932	0.111	0.032	1
APOL1	0.0386147	-0.356282	0.333	0.543	1
ITGA6	0.038651	-0.428959	0.037	0.191	1
NDUFAF3	0.0391864	-0.387667	0.407	0.603	1
SMYD2	0.0393103	0.309669	0.222	0.096	1
ZNF277	0.0394975	-0.312427	0.037	0.209	1
ARL4D	0.0395562	0.267953	0.185	0.074	1
PPA2	0.0396933	-0.329663	0.074	0.262	1
RSL24D1	0.0397048	0.251581	0.37	0.209	1
METTL23	0.0398133	-0.302592	0	0.138	1
MRPL47	0.0398133	-0.308551	0	0.138	1
AUH	0.0398133	-0.317758	0	0.138	1
ANKRD36BP1	0.0398133	-0.318332	0	0.138	1
CCNT1	0.0398133	-0.328953	0	0.138	1
DNMT1	0.0398133	-0.374927	0	0.138	1
DAD1	0.040076	0.349785	0.815	0.688	1
POLR2J	0.0401141	-0.272435	0.111	0.33	1
TXN	0.0401622	-0.339812	0.704	0.862	1
ATL3	0.0404634	0.270776	0.185	0.074	1
SLC37A4	0.0405347	-0.382558	0.037	0.199	1
CCT3	0.0406551	-0.427828	0.148	0.337	1
TCEAL2	0.0407417	-0.417606	0.444	0.638	1
BX284668.5	0.0407912	-0.395259	0.074	0.23	1
FAM3C	0.0407913	-0.404508	0.074	0.23	1
PNISR	0.0410015	-0.432843	0.222	0.401	1
DCTN3	0.0410407	-0.530294	0.222	0.394	1
TLE4	0.0411025	0.323529	0.593	0.436	1
HDGFL3	0.0413902	0.373667	0.444	0.287	1
SPPL2A	0.041475	-0.400637	0.148	0.33	1
RSRP1	0.0415501	0.42582	0.259	0.135	1
CCNL1	0.0415773	0.371706	0.37	0.22	1
RPS5	0.0418093	-0.434799	0.519	0.709	1
CD164	0.0418423	-0.312806	0.222	0.472	1
KCNJ1	0.0418573	0.281209	0.185	0.074	1
NAP1L4	0.0421946	0.263826	0.593	0.39	1
DNAJC21	0.0422851	0.335929	0.333	0.174	1
THUMPD3-AS1	0.0424711	0.290172	0.185	0.071	1
SLC7A8	0.0425665	-0.469122	0.185	0.362	1
RYBP	0.042598	-0.405212	0.074	0.227	1
POLR2H	0.0427967	-0.332525	0	0.135	1
LMX1B	0.0427967	-0.360739	0	0.135	1
HABP4	0.0428089	0.36405	0.185	0.074	1
ZNF626	0.0428295	0.292975	0.148	0.053	1
PSIP1	0.0429099	-0.452653	0.333	0.518	1
CFAP36	0.0429893	0.430732	0.481	0.291	1
UBE2L6	0.0430251	-0.36509	0.185	0.387	1
TAOK3	0.0431649	-0.430992	0.111	0.294	1
ARHGDIA	0.0432665	-0.306934	0.074	0.262	1
AL049838.1	0.0433095	-0.403407	0.222	0.443	1
NDUFA10	0.0433739	-0.532642	0.259	0.433	1
SLTM	0.0438324	-0.378384	0.222	0.422	1
MRPL55	0.0440584	-0.456548	0.185	0.372	1
THBS1	0.0440605	-0.383517	0.037	0.184	1
RPL3	0.0445877	-0.2852	0.704	0.872	1
NECAB1	0.0447346	-0.408835	0.333	0.578	1
MED21	0.0450457	-0.392894	0.074	0.238	1
CALM1	0.045254	-0.278213	0.963	0.965	1
MAT2B	0.0456789	-0.274051	0.148	0.34	1
WDR1	0.0456838	-0.391741	0.074	0.234	1
SPCS1	0.0457381	-0.37906	0.481	0.645	1
CDC5L	0.045763	-0.380307	0.111	0.301	1
LIAS	0.0459946	-0.276939	0	0.131	1
ASMTL	0.0459946	-0.293721	0	0.131	1
SAP30BP	0.0459946	-0.329668	0	0.131	1
RPS27AP16	0.0459946	-0.26406	0	0.131	1
ACOT7	0.0459946	-0.264891	0	0.131	1
IL1RAP	0.0459946	-0.328156	0	0.131	1
GMPR2	0.0459946	-0.328399	0	0.131	1
ADORA1	0.0459946	-0.34699	0	0.131	1
ETFRF1	0.0460523	-0.346079	0.074	0.245	1
SLC44A1	0.0463245	-0.36174	0.037	0.195	1
DNAJC19	0.0463514	0.358573	0.556	0.379	1
USP14	0.0465268	-0.468068	0.074	0.223	1
PLD3	0.0467941	-0.36643	0.259	0.468	1
UPF3A	0.0472089	-0.36513	0.148	0.337	1
MRPL52	0.0472158	-0.465881	0.259	0.44	1
TUSC3	0.0473005	-0.37189	0.37	0.553	1
DNAJB2	0.0476057	-0.376021	0.037	0.181	1
NSA2	0.0478061	-0.472802	0.259	0.447	1
LAMP1	0.0478912	-0.454742	0.222	0.404	1
VPS28	0.0479882	-0.461215	0.185	0.362	1
DUT	0.048278	0.381239	0.704	0.596	1
C6orf89	0.048473	-0.352594	0.037	0.191	1
CHRAC1	0.0486979	0.303662	0.333	0.188	1
SMARCB1	0.0487821	-0.350293	0.037	0.181	1
KIAA1191	0.0488234	-0.397638	0.148	0.316	1
PTPN13	0.0489167	0.354402	0.556	0.411	1
BTN3A2	0.0491704	-0.432614	0.074	0.238	1
MCRIP1	0.0492485	-0.361526	0.037	0.191	1
THNSL2	0.0494222	-0.285026	0	0.128	1
EXOC7	0.0494222	-0.307285	0	0.128	1
ADAMTS19	0.0494223	-0.262802	0	0.128	1
KYAT3	0.0494223	-0.285088	0	0.128	1
HCP5	0.0494223	-0.288927	0	0.128	1
ELAVL1	0.0494223	-0.298191	0	0.128	1
PRR14L	0.0494223	-0.323624	0	0.128	1
SNAPC3	0.0494223	-0.323861	0	0.128	1
CTR9	0.0496099	-0.398382	0.111	0.277	1
NBPF14	0.0502426	0.265502	0.259	0.128	1
TOR1AIP2	0.0503885	-0.335069	0.037	0.181	1
PGS1	0.0507535	0.357515	0.148	0.057	1
PCGF5	0.0508362	0.287453	0.222	0.099	1
ANXA7	0.0509739	-0.302323	0.185	0.401	1
HADHA	0.0510671	-0.338032	0.296	0.511	1
LSM7	0.0512118	0.32079	0.296	0.152	1
AXDND1	0.0512327	-0.346635	0.037	0.191	1
ZNF106	0.0517187	0.267373	0.556	0.394	1
FKBP2	0.0518349	-0.444894	0.296	0.514	1
RCHY1	0.0519333	-0.30983	0.037	0.188	1
HIGD1A	0.0519639	-0.312257	0.444	0.649	1
NT5C	0.0522578	-0.38877	0.111	0.287	1
MAP2	0.0524653	-0.435002	0.074	0.23	1
LSM3	0.0527495	-0.368127	0.296	0.472	1
EMC4	0.0529461	-0.384905	0.296	0.479	1
DYNC1I2	0.0529809	-0.333393	0.741	0.851	1
AHNAK	0.0530511	-0.417841	0.296	0.472	1
YWHAG	0.0530713	-0.366139	0.148	0.326	1
TMOD1	0.053096	-0.254127	0	0.124	1
ZMAT3	0.053096	-0.265679	0	0.124	1
PSMB8-AS1	0.053096	-0.29207	0	0.124	1
GAREM1	0.053096	-0.296712	0	0.124	1
COMMD10	0.053096	-0.308626	0	0.124	1
TRIM38	0.053096	-0.310473	0	0.124	1
GOSR2	0.053096	-0.319061	0	0.124	1
KLHL22	0.053096	-0.319354	0	0.124	1
PHYHD1	0.053096	-0.33124	0	0.124	1
SLC25A39	0.0532252	-0.356013	0.074	0.238	1
TRIQK	0.053462	0.408214	0.185	0.078	1
CALR	0.0534709	-0.427537	0.593	0.727	1
NAA20	0.0538926	-0.306309	0.222	0.401	1
CNBP	0.0539841	-0.355084	0.519	0.713	1
CADM1	0.0541226	0.343363	0.481	0.319	1
MIB1	0.0544631	-0.424283	0.481	0.681	1
SNX17	0.0551887	-0.353401	0.037	0.184	1
ITGA2	0.0554154	0.324741	0.111	0.035	1
SURF4	0.0555236	-0.418293	0.037	0.174	1
MBP	0.0555782	-0.365631	0.074	0.234	1
FUCA2	0.0562477	-0.406527	0.148	0.319	1
GPRC5A	0.0565155	-0.31377	0.148	0.351	1
TFG	0.0565687	-0.442292	0.148	0.301	1
SH3BGRL3	0.0566342	-0.457487	0.333	0.496	1
SELENOF	0.0566411	0.317339	0.556	0.383	1
DACH1	0.0566968	-0.268641	0.519	0.73	1
ZFP91	0.0567944	-0.3903	0.074	0.23	1
PLEKHA5	0.0569457	-0.31617	0.333	0.55	1
C1orf115	0.0570172	0.279437	0.667	0.564	1
2020-09-09	0.0570336	-0.27796	0	0.121	1
DHRS7B	0.0570336	-0.324549	0	0.121	1
COQ5	0.0570337	-0.258163	0	0.121	1
AC118549.1	0.0570337	-0.267573	0	0.121	1
RDH14	0.0570337	-0.284353	0	0.121	1
RCAN3	0.0570337	-0.285274	0	0.121	1
CMPK1	0.0570337	-0.287522	0	0.121	1
GCHFR	0.0570337	-0.2878	0	0.121	1
MAPK1IP1L	0.0571964	-0.30643	0.111	0.273	1
TMBIM1	0.0573275	-0.374411	0.148	0.319	1
PPP2R5E	0.0573491	-0.443584	0.148	0.309	1
EIF3E	0.0574104	0.398299	0.556	0.379	1
FAM173A	0.0575477	-0.345303	0.037	0.177	1
FEZ2	0.0575951	-0.390967	0.333	0.539	1
WWC2	0.0576887	0.49513	0.556	0.45	1
PRELID1	0.0577169	-0.386044	0.148	0.309	1
EIF2A	0.0578274	-0.26981	0.074	0.245	1
DYNC1LI1	0.0580254	-0.391472	0.074	0.23	1
YBX1	0.0581366	0.295831	0.778	0.72	1
SUN2	0.0586401	-0.39862	0.111	0.28	1
DDN	0.058662	-0.332228	0.296	0.45	1
ALKBH7	0.0586665	-0.385384	0.296	0.475	1
ITGB8	0.0587038	-0.390332	0.481	0.699	1
MT-TE	0.0590386	0.369696	0.741	0.621	1
AC007969.1	0.0592785	-0.327415	0.074	0.23	1
TMEM179B	0.0593063	0.260766	0.519	0.344	1
GADD45GIP1	0.0593664	-0.43583	0.296	0.5	1
HERC2	0.0594344	0.274154	0.222	0.103	1
SSNA1	0.0595392	-0.408391	0.074	0.213	1
RALGAPA1	0.059787	-0.305514	0.037	0.188	1
AC092069.1	0.0598741	-0.509714	0.148	0.323	1
TOR1AIP1	0.059937	-0.329053	0.037	0.17	1
GOLGA4	0.0601973	-0.48413	0.556	0.667	1
ARHGAP18	0.060322	-0.410342	0.148	0.316	1
CA2	0.0603416	-0.397336	0.148	0.305	1
LINC00958	0.0605579	0.251121	0.111	0.035	1
TRIM8	0.0609236	-0.40661	0.148	0.309	1
SPTLC1	0.0612542	-0.258935	0	0.117	1
FKBP4	0.0612542	-0.261395	0	0.117	1
CAAP1	0.0612542	-0.262807	0	0.117	1
PUM2	0.0612542	-0.262984	0	0.117	1
SRP19	0.0612542	-0.26761	0	0.117	1
PDS5A	0.0612542	-0.286627	0	0.117	1
NOL3	0.0612542	-0.30744	0	0.117	1
HMGCS1	0.0612542	-0.311709	0	0.117	1
ROBO2	0.0612801	-0.450202	0.185	0.376	1
ACO2	0.0613981	-0.373755	0.037	0.17	1
CALU	0.0614276	-0.388186	0.259	0.429	1
PIP4P2	0.0614629	-0.293009	0.037	0.181	1
GGPS1	0.0617988	-0.331072	0.037	0.177	1
CTSA	0.0618213	-0.320507	0.296	0.468	1
PEF1	0.0618415	0.431307	0.259	0.142	1
PDZD11	0.0618916	-0.358152	0.037	0.17	1
AKIP1	0.0622424	0.33109	0.333	0.209	1
DAZAP2	0.0625958	-0.374995	0.519	0.667	1
CETN2	0.0627036	0.292317	0.593	0.461	1
MCTS1	0.0627541	-0.386498	0.074	0.22	1
SINHCAF	0.0627853	0.29726	0.37	0.223	1
INSIG1	0.062918	-0.376395	0.037	0.181	1
GIGYF2	0.0630334	-0.31603	0.111	0.28	1
H3F3AP4	0.0631852	-0.328266	0.111	0.273	1
EIF3M	0.063497	-0.402146	0.667	0.78	1
FAM206A	0.0635274	0.268043	0.222	0.11	1
PET100	0.0636675	-0.33054	0.074	0.223	1
POLR2E	0.0638255	-0.476371	0.148	0.294	1
FRY	0.0640103	-0.506779	0.407	0.528	1
AK2	0.0641495	-0.433944	0.111	0.255	1
SDHA	0.0644086	-0.30931	0.037	0.17	1
PIAS1	0.0646829	-0.35599	0.037	0.167	1
ZNF580	0.0655105	-0.397192	0.148	0.301	1
KDM2A	0.0657783	-0.270139	0	0.113	1
TIMM10B	0.0657784	-0.252859	0	0.113	1
PYM1	0.0657784	-0.262771	0	0.113	1
TMEM246	0.0657784	-0.268281	0	0.113	1
LENG1	0.0657784	-0.30385	0	0.113	1
FKBP5	0.0660059	-0.335929	0.111	0.291	1
MYH9	0.0661013	0.271369	0.667	0.493	1
GGCX	0.0662523	-0.306824	0.037	0.167	1
TRAPPC6A	0.0663065	-0.323459	0.037	0.177	1
SYAP1	0.0667435	-0.366562	0.222	0.415	1
MYO1C	0.0668811	-0.280529	0.222	0.401	1
DUSP23	0.0673455	-0.46642	0.333	0.465	1
RBBP7	0.0680154	-0.385408	0.148	0.305	1
PIGP	0.0686712	-0.404996	0.074	0.206	1
UTP23	0.0688832	-0.259222	0.111	0.284	1
ARRDC4	0.0689239	-0.34394	0.259	0.457	1
GRHPR	0.0692403	-0.318455	0.222	0.387	1
PSMD8	0.0693361	-0.428522	0.333	0.496	1
IBTK	0.0694799	-0.398146	0.111	0.259	1
LINC02149	0.0697753	-0.256651	0.074	0.241	1
SEC61A1	0.0697851	-0.339718	0.037	0.163	1
CDC23	0.0697852	-0.353296	0.037	0.163	1
EGR1	0.0699476	0.412524	0.222	0.113	1
MMADHC	0.0702745	-0.391638	0.185	0.351	1
ZBTB38	0.0703111	0.388702	0.556	0.404	1
ARL2	0.0703311	-0.34473	0.259	0.404	1
SNHG17	0.0706283	-0.293907	0	0.11	1
ERLIN1	0.0706285	-0.250933	0	0.11	1
NFRKB	0.0706285	-0.256104	0	0.11	1
ANXA5	0.0706505	0.258066	0.667	0.496	1
ARGLU1	0.0708197	-0.412722	0.296	0.465	1
RAB1B	0.0708414	-0.38508	0.148	0.294	1
CNTN4	0.0710817	-0.278593	0.037	0.177	1
PURA	0.0710938	-0.255884	0.222	0.426	1
RAB7A	0.0712928	-0.307208	0.259	0.433	1
TCEAL6	0.0713505	-0.388537	0.037	0.17	1
DPP6	0.0714888	-0.37469	0.556	0.695	1
SERINC1	0.0715409	-0.270621	0.667	0.752	1
GPN3	0.0718011	-0.384288	0.074	0.213	1
IMMT	0.07185	-0.343166	0.111	0.277	1
ERP44	0.0719473	-0.36363	0.148	0.301	1
DDX24	0.0721818	-0.324907	0.556	0.677	1
MRPL20	0.0722559	-0.265446	0.296	0.507	1
ERGIC2	0.0723582	0.269955	0.481	0.333	1
RPS3	0.0723979	-0.260507	0.852	0.876	1
RASSF7	0.0728258	-0.363243	0.074	0.216	1
ATP6V1E1	0.0730372	-0.323012	0.222	0.415	1
ODC1	0.0733164	-0.405548	0.222	0.387	1
WDR45B	0.0736673	-0.353159	0.148	0.309	1
MIR99AHG	0.0736898	0.416536	0.222	0.113	1
PSMD11	0.073746	-0.366022	0.111	0.255	1
ZC3H7A	0.0743772	0.299613	0.296	0.17	1
ILDR2	0.0747553	-0.280242	0.037	0.17	1
BAZ2A	0.0747773	-0.386781	0.074	0.202	1
EIF3J	0.0755964	-0.34154	0.407	0.613	1
NTRK2	0.0757598	-0.293597	0.111	0.284	1
NCOR1	0.0757729	-0.439404	0.333	0.468	1
THAP6	0.0758285	-0.251077	0	0.106	1
ZMYM5	0.0758285	-0.260072	0	0.106	1
MRPS34	0.0758402	-0.285694	0.074	0.238	1
PMVK	0.0759804	-0.328011	0.111	0.266	1
DTD1	0.0761961	-0.368194	0.111	0.255	1
ELOVL5	0.0764721	-0.373569	0.037	0.16	1
PSME2	0.0767132	-0.35146	0.222	0.379	1
ELOVL1	0.0769477	-0.403529	0.074	0.202	1
ZNF451	0.077079	-0.325376	0.037	0.16	1
MANSC1	0.0778087	-0.258755	0.037	0.174	1
COBLL1	0.077815	0.371161	0.222	0.11	1
AL118508.1	0.0784741	-0.330592	0.222	0.411	1
ARID4A	0.0785585	-0.381258	0.111	0.262	1
EIF3G	0.0785693	-0.278756	0.074	0.22	1
HACD3	0.0788347	-0.301274	0.37	0.56	1
NCOA4	0.0788374	-0.312884	0.148	0.305	1
THAP12	0.0791722	0.255632	0.222	0.11	1
LPL	0.0791773	-0.35058	0.074	0.216	1
PPHLN1	0.0793734	-0.350876	0.259	0.447	1
HSPA4	0.0797373	-0.366376	0.111	0.255	1
MYLK	0.0800634	0.264903	0.741	0.617	1
NUCB1	0.0803664	-0.335323	0.185	0.34	1
PHB	0.0804295	-0.419355	0.148	0.284	1
TOP1	0.0807119	-0.373129	0.222	0.379	1
TPD52	0.0810482	-0.362224	0.222	0.383	1
RAET1E	0.0814047	-0.282418	0	0.103	1
MTRF1L	0.0814047	-0.294121	0	0.103	1
FGB	0.0814047	-0.330238	0	0.103	1
KLF6	0.0815093	0.328232	0.37	0.241	1
PDPK1	0.0818076	-0.316983	0.037	0.156	1
FRMD3	0.0819571	-0.343332	0.407	0.564	1
VBP1	0.0820277	-0.27427	0.111	0.266	1
BANP	0.0825056	0.260571	0.111	0.039	1
UBAP1	0.0825442	-0.371608	0.074	0.199	1
BLVRB	0.0825712	-0.461859	0.259	0.397	1
LAP3	0.0831523	-0.334757	0.074	0.213	1
SPCS3	0.0832151	0.410682	0.481	0.319	1
EIF4H	0.0835737	-0.371782	0.111	0.245	1
DHX36	0.0836475	-0.357383	0.407	0.543	1
GPR107	0.0837213	-0.327328	0.074	0.199	1
LZIC	0.0837615	0.2822	0.259	0.135	1
NQO1	0.0838626	-0.376463	0.63	0.709	1
AMD1	0.0839434	0.277028	0.333	0.191	1
HIVEP2	0.0840174	0.256712	0.259	0.138	1
ZC3H14	0.0846528	-0.304699	0.185	0.337	1
MOCS2	0.0847271	0.336017	0.63	0.468	1
EFEMP1	0.0851248	-0.336229	0.333	0.535	1
XRCC6	0.0854645	-0.326382	0.111	0.259	1
RRP15	0.085552	-0.353274	0.074	0.206	1
ACSL1	0.0863269	-0.303093	0.037	0.167	1
UPF3B	0.0864415	-0.258981	0.074	0.22	1
BBX	0.0865044	-0.263571	0.444	0.606	1
USP47	0.0865525	-0.374009	0.148	0.291	1
STMP1	0.0868865	0.284836	0.37	0.22	1
TTC19	0.0869164	-0.405703	0.111	0.241	1
PFDN1	0.0874307	-0.297811	0.296	0.45	1
TMEM131	0.0874995	-0.371946	0.037	0.152	1
WWTR1	0.0876317	-0.388509	0.185	0.337	1
SFRP1	0.0878272	0.337714	0.148	0.064	1
STAU1	0.0879058	0.29898	0.481	0.333	1
SLC16A9	0.0880102	-0.386678	0.037	0.16	1
ZC3HAV1	0.0881893	-0.340389	0.037	0.152	1
HSPA9	0.0884829	-0.319769	0.296	0.461	1
LRRCC1	0.0887563	0.260482	0.222	0.117	1
EHD1	0.0888345	0.375401	0.222	0.113	1
TMEM33	0.088861	-0.283325	0.037	0.163	1
MORF4L2	0.0889318	-0.341993	0.259	0.44	1
GPAA1	0.0891273	-0.3287	0.074	0.209	1
TMEM134	0.0895702	-0.319982	0.111	0.252	1
MIR1244-2	0.089582	-0.282793	0.037	0.152	1
TMBIM4	0.0897092	-0.367796	0.37	0.511	1
TMEM47	0.0900631	-0.29669	0.037	0.16	1
CHMP1B	0.090285	-0.264743	0.037	0.152	1
MYL3	0.090285	-0.298035	0.037	0.152	1
HNRNPA0	0.0903294	-0.328828	0.148	0.287	1
CARHSP1	0.0904183	-0.367301	0.148	0.298	1
MT1G	0.0908587	-0.645928	0.259	0.422	1
URI1	0.0910398	0.365154	0.296	0.174	1
EHD4	0.0915952	-0.318378	0.074	0.209	1
RNF181	0.0916325	-0.293649	0.296	0.465	1
AQP2	0.0917443	0.47789	0.111	0.043	1
B3GALT2	0.0920907	0.33698	0.407	0.287	1
ILKAP	0.0923271	0.284252	0.185	0.089	1
C1GALT1	0.0923459	-0.344837	0.074	0.199	1
PSMC5	0.0925096	-0.297209	0.148	0.309	1
SPTY2D1	0.0926047	0.291438	0.222	0.113	1
IRF1	0.0928601	0.541714	0.222	0.117	1
GUK1	0.0929478	-0.423321	0.37	0.511	1
ATP6AP1	0.0931436	-0.350306	0.222	0.369	1
GAS1	0.0931618	-0.330457	0.111	0.262	1
MED19	0.0932306	-0.307781	0.074	0.216	1
KRT10	0.0935486	-0.275073	0.296	0.465	1
ARHGAP5	0.094259	-0.364291	0.407	0.557	1
HSPA1A	0.0942971	-0.32656	0.259	0.422	1
C20orf24	0.094306	-0.302723	0.037	0.149	1
RMND5A	0.094306	-0.30413	0.037	0.149	1
OXSR1	0.0943414	0.432924	0.259	0.16	1
OSTM1	0.0945991	0.337598	0.185	0.092	1
SYCE1L	0.0950036	-0.275694	0.037	0.16	1
NUDT3	0.0953894	-0.391416	0.185	0.323	1
RARS	0.0957137	-0.342248	0.111	0.241	1
NSD3	0.0965383	0.310177	0.444	0.305	1
SPTAN1	0.0965814	-0.271682	0.222	0.379	1
UQCR10	0.0969835	-0.274636	0.741	0.869	1
ATP6AP2	0.096984	-0.342776	0.37	0.514	1
EIF5	0.0970432	-0.273725	0.593	0.798	1
MRPL50	0.0972933	-0.336592	0.037	0.149	1
PTTG1IP	0.0973013	0.378627	0.815	0.759	1
LAMTOR1	0.0973149	-0.328111	0.296	0.468	1
GADD45B	0.097528	0.404139	0.556	0.433	1
LAMTOR5	0.0981534	-0.366229	0.481	0.585	1
SSU72	0.098722	-0.301323	0.148	0.291	1
BOLA3	0.0989451	-0.452135	0.148	0.27	1
IQGAP1	0.0989612	-0.309102	0.481	0.603	1
SIGIRR	0.0992689	-0.274942	0.037	0.156	1
SLC2A12	0.0999079	-0.381516	0.222	0.387	1
MAGED2	0.100004	-0.406031	0.407	0.525	1
COX5A	0.100045	-0.386729	0.444	0.599	1
DAG1	0.100393	-0.385858	0.444	0.592	1
UBN1	0.100726	0.304605	0.185	0.092	1
RILPL2	0.100751	0.272604	0.148	0.064	1
NINJ1	0.101156	0.254402	0.37	0.234	1
BOD1L1	0.101426	-0.269776	0.148	0.298	1
NSMCE1	0.101567	-0.375376	0.185	0.326	1
PPP2CB	0.101806	-0.323872	0.259	0.418	1
VWA1	0.101927	-0.395525	0.259	0.397	1
SDR39U1	0.102412	-0.316829	0.037	0.145	1
DNAJC2	0.102423	-0.352132	0.074	0.191	1
DDX18	0.102643	0.364381	0.556	0.433	1
SERBP1	0.103096	-0.308023	0.481	0.709	1
PLPP3	0.103197	-0.481786	0.148	0.266	1
AAGAB	0.10321	-0.312144	0.037	0.145	1
MZT2A	0.103445	-0.31034	0.111	0.252	1
EEF2	0.103452	-0.269441	0.148	0.316	1
CTGF	0.103589	0.254167	0.778	0.752	1
SP110	0.103874	-0.278086	0.037	0.156	1
LPP	0.103892	-0.322526	0.074	0.206	1
NUDT16	0.104531	-0.378376	0.074	0.195	1
WDR61	0.104665	-0.347558	0.111	0.238	1
UGT2B7	0.104688	-0.546034	0.148	0.291	1
RPL36AL	0.104701	-0.2955	0.63	0.727	1
HEIH	0.104893	-0.338876	0.148	0.284	1
KLC1	0.105811	-0.279344	0.111	0.255	1
MCUB	0.106502	-0.279492	0.037	0.152	1
SNHG10	0.106561	0.412402	0.222	0.121	1
TMEM176B	0.106868	-0.38632	0.111	0.227	1
ATP5F1C	0.10711	-0.314946	0.407	0.546	1
USP16	0.107352	-0.295505	0.481	0.603	1
DCAF6	0.107588	-0.359154	0.148	0.273	1
TSGA10	0.107933	0.414638	0.111	0.043	1
MGP	0.107956	0.673924	0.481	0.365	1
PTMAP2	0.108133	-0.307583	0.444	0.571	1
HOXA7	0.108367	-0.288966	0.185	0.344	1
CAMSAP2	0.109235	-0.305271	0.185	0.323	1
PRPF40A	0.109444	-0.329588	0.519	0.699	1
GSK3B	0.109475	-0.297454	0.037	0.142	1
PCBD1	0.10949	-0.258923	0.407	0.553	1
CUL3	0.109746	0.336436	0.259	0.149	1
PTRH1	0.109775	-0.299916	0.037	0.145	1
GNB2	0.109783	-0.339415	0.185	0.312	1
ECPAS	0.109891	-0.330541	0.111	0.241	1
FNDC3B	0.110137	-0.374448	0.37	0.496	1
TCEA1	0.110413	0.259769	0.667	0.557	1
TRIP12	0.111081	-0.291656	0.111	0.245	1
PTPRF	0.11117	-0.268877	0.074	0.209	1
GDI1	0.111214	-0.320625	0.074	0.188	1
ARPC1B	0.112041	-0.317529	0.037	0.142	1
TRUB1	0.112674	0.251243	0.148	0.071	1
SQOR	0.112675	-0.283506	0.185	0.34	1
EIF3F	0.1128	-0.285797	0.111	0.238	1
S100A16	0.113463	-0.30092	0.222	0.39	1
ITGAE	0.113778	-0.277316	0.037	0.142	1
SMAP1	0.113992	-0.2691	0.148	0.294	1
EPSTI1	0.114238	-0.276412	0.037	0.149	1
CLPTM1	0.114282	-0.292358	0.074	0.188	1
ARID1B	0.114655	-0.281499	0.037	0.142	1
AAMDC	0.11506	-0.354503	0.074	0.188	1
COL3A1	0.115099	-0.29622	0.037	0.149	1
PPP1R21	0.115261	0.295124	0.222	0.117	1
BBS4	0.115453	-0.252057	0.111	0.252	1
PUM3	0.115655	-0.332881	0.074	0.195	1
FAM13B	0.115667	0.255748	0.481	0.316	1
RBM43	0.11594	-0.34799	0.111	0.245	1
ZCRB1	0.116094	-0.352966	0.556	0.674	1
ATP5MC3	0.116245	-0.264674	0.63	0.759	1
PIGT	0.116248	-0.38411	0.148	0.266	1
TM9SF3	0.116367	0.251524	0.556	0.433	1
PAWR	0.116449	0.271203	0.519	0.362	1
CCT6A	0.116674	-0.353774	0.296	0.415	1
SIL1	0.117114	0.353724	0.296	0.188	1
NAA35	0.117179	0.259808	0.185	0.099	1
HIST1H1C	0.11791	-0.413986	0.222	0.348	1
ALDH2	0.117951	-0.328031	0.148	0.28	1
ATP5F1D	0.118198	-0.389827	0.519	0.582	1
OS9	0.118258	-0.330609	0.259	0.383	1
CKAP4	0.11879	0.49215	0.333	0.223	1
SPAG7	0.11929	-0.285224	0.148	0.294	1
NFYB	0.119438	0.295711	0.148	0.071	1
ASB8	0.119563	-0.300658	0.074	0.195	1
BABAM2	0.119741	-0.273396	0.037	0.138	1
PRX	0.119741	-0.33666	0.037	0.138	1
TIMP1	0.120087	0.257587	0.778	0.656	1
VPS25	0.120507	-0.284819	0.074	0.191	1
DNAJA2	0.120698	-0.321796	0.111	0.248	1
CDKN2AIP	0.120824	0.361267	0.222	0.131	1
CUBN	0.121312	-0.403933	0.074	0.191	1
DBI	0.121749	-0.38585	0.556	0.66	1
AIFM1	0.122371	-0.382118	0.074	0.181	1
PEPD	0.123352	-0.394955	0.185	0.316	1
SNRPB2	0.12367	-0.251514	0.481	0.624	1
PERP	0.12405	-0.427982	0.222	0.33	1
AZIN1	0.124651	-0.266809	0.037	0.142	1
RNASEH2B	0.124812	0.382134	0.333	0.209	1
CCT7	0.125404	-0.264991	0.111	0.245	1
ECH1	0.125645	-0.304749	0.333	0.457	1
CCDC25	0.126087	-0.377872	0.259	0.376	1
FBXO7	0.126435	-0.31233	0.111	0.241	1
IDS	0.12666	-0.333511	0.111	0.223	1
IFT88	0.127492	-0.258622	0.037	0.142	1
EEF1AKMT1	0.127549	0.312315	0.111	0.046	1
BBOX1	0.127689	-0.376284	0.074	0.195	1
MTHFD2L	0.127954	-0.252399	0.037	0.135	1
CCNT2	0.127954	-0.26139	0.037	0.135	1
GCC2	0.128093	0.256525	0.63	0.514	1
CHMP2A	0.128306	-0.307806	0.222	0.372	1
PLRG1	0.128936	-0.284298	0.037	0.135	1
DDX50	0.129523	-0.342363	0.148	0.287	1
MED10	0.13054	0.34138	0.259	0.156	1
AC023154.1	0.130714	-0.296393	0.296	0.5	1
FAM213A	0.131626	-0.259284	0.074	0.199	1
PTGDS	0.131729	0.28119	1	0.989	1
PSMC3	0.131896	-0.342954	0.259	0.394	1
BCCIP	0.132162	0.317124	0.37	0.259	1
ERG28	0.132374	-0.328666	0.111	0.22	1
PSMC2	0.132653	-0.294826	0.185	0.319	1
DHRS3	0.133487	-0.275984	0.296	0.436	1
PHLDB2	0.134041	-0.363548	0.148	0.273	1
TMEM192	0.134345	-0.344444	0.148	0.266	1
PSMC4	0.134667	-0.324142	0.111	0.223	1
ARPP19	0.134808	0.271665	0.593	0.518	1
CLDN5	0.134991	-0.411269	0.556	0.663	1
EMC2	0.135148	-0.282809	0.148	0.291	1
HDGF	0.135231	-0.307006	0.185	0.316	1
PTGR1	0.135885	0.300958	0.333	0.227	1
SMIM19	0.135895	-0.310242	0.148	0.291	1
SART3	0.136714	-0.308022	0.037	0.131	1
NPHS1	0.136852	-0.358806	0.778	0.83	1
MT-TT	0.138048	-0.253972	0.074	0.181	1
ADD3	0.138669	-0.302338	0.667	0.706	1
NUDCD3	0.139174	-0.336095	0.111	0.216	1
TXNDC17	0.139741	-0.3308	0.481	0.585	1
RNF19A	0.139792	0.300911	0.407	0.284	1
CISD1	0.139804	-0.34904	0.259	0.387	1
NPLOC4	0.139807	0.361184	0.148	0.067	1
PYCR2	0.139868	-0.253018	0.037	0.131	1
SMNDC1	0.139881	-0.367622	0.074	0.181	1
SLC25A24	0.140402	0.298984	0.222	0.128	1
EMC10	0.140501	-0.307134	0.259	0.387	1
TNFRSF1A	0.140805	-0.274705	0.074	0.181	1
ARRDC3	0.141057	-0.306148	0.074	0.174	1
RERE	0.141332	-0.436641	0.333	0.429	1
ZNF322	0.141647	0.256737	0.148	0.071	1
ERGIC1	0.141733	-0.288362	0.074	0.181	1
IGFBP7	0.141836	0.27226	1	0.993	1
ATP6V1H	0.141955	-0.319689	0.111	0.227	1
PCF11	0.142002	-0.310815	0.037	0.131	1
PRDM2	0.142451	0.258783	0.222	0.128	1
MYO6	0.142601	-0.327123	0.222	0.358	1
CD9	0.14282	-0.27953	0.37	0.511	1
CCDC93	0.142832	0.324067	0.259	0.16	1
SYNE1	0.143206	0.295794	0.519	0.379	1
CCDC85C	0.143901	-0.289227	0.111	0.234	1
TMEM19	0.143905	-0.264512	0.074	0.174	1
RAC1P2	0.143905	-0.297742	0.074	0.174	1
ABRACL	0.143907	-0.261994	0.259	0.404	1
SERPINB6	0.144153	-0.332613	0.111	0.22	1
STON1	0.144582	0.287965	0.185	0.103	1
ZC3H15	0.144992	-0.349762	0.407	0.521	1
OSBPL1A	0.146201	-0.278935	0.074	0.184	1
NAE1	0.146445	-0.315586	0.074	0.181	1
PSMD13	0.14655	-0.31743	0.148	0.259	1
SLC26A2	0.147172	-0.265744	0.037	0.128	1
BMP2	0.147172	-0.333391	0.037	0.128	1
MRFAP1L1	0.147402	-0.278129	0.074	0.181	1
PDHB	0.147674	-0.275936	0.111	0.23	1
AP3S1	0.147881	-0.285475	0.074	0.17	1
PLSCR1	0.148291	-0.264395	0.037	0.128	1
APLN	0.149061	-0.273576	0.111	0.234	1
HSD17B14	0.149416	-0.272521	0.037	0.128	1
MIER1	0.151276	-0.348299	0.259	0.387	1
BANK1	0.151519	-0.326018	0.074	0.177	1
MSRA	0.151687	-0.274957	0.037	0.128	1
PRCP	0.151692	-0.260333	0.111	0.234	1
MAGED1	0.152139	-0.297426	0.111	0.22	1
FOXP1	0.152868	0.266854	0.259	0.152	1
PUF60	0.153325	-0.257074	0.111	0.227	1
RAMP1	0.153913	0.738637	0.296	0.216	1
SEC63	0.1545	0.282858	0.444	0.333	1
RAB34	0.154503	-0.261335	0.074	0.177	1
ZSWIM6	0.15454	-0.255062	0.074	0.188	1
PRKAR2A	0.154548	-0.315834	0.148	0.266	1
PIK3C2A	0.15473	0.272556	0.222	0.135	1
PDE7B	0.155332	-0.257419	0.037	0.131	1
TMEM256	0.155891	-0.302467	0.185	0.316	1
TSNAX	0.156044	-0.257432	0.111	0.227	1
MED13	0.156516	-0.324522	0.074	0.177	1
THUMPD3	0.156762	0.257258	0.37	0.259	1
PPP1R15A	0.157209	0.323733	0.296	0.188	1
NFKBIA	0.158012	0.442129	0.519	0.461	1
RETREG2	0.158404	-0.270134	0.037	0.124	1
TOLLIP	0.158404	-0.282728	0.037	0.124	1
ZBTB7A	0.158855	0.330528	0.222	0.131	1
CYHR1	0.15902	-0.288271	0.074	0.17	1
AC138649.1	0.15932	0.424329	0.148	0.078	1
SRPRB	0.159602	-0.250144	0.037	0.124	1
PTPN21	0.159602	-0.253365	0.037	0.124	1
TATDN1	0.159841	-0.256921	0.037	0.128	1
EXOSC1	0.160806	-0.255561	0.037	0.124	1
STAM2	0.161265	0.265752	0.185	0.103	1
NORAD	0.161802	-0.352239	0.37	0.511	1
CISD2	0.162352	-0.265849	0.111	0.22	1
MGEA5	0.162353	-0.287791	0.074	0.167	1
PSMB5	0.162466	-0.296892	0.519	0.667	1
CDK14	0.163236	-0.263941	0.037	0.124	1
CUX1	0.163421	-0.352557	0.259	0.34	1
SERP1	0.163852	0.254947	0.481	0.383	1
CHRNB1	0.164461	-0.25702	0.037	0.124	1
ZNF24	0.164592	-0.300664	0.185	0.305	1
SMCHD1	0.164687	0.298283	0.333	0.234	1
NEDD8	0.164711	-0.340621	0.444	0.539	1
TIAL1	0.165581	-0.286876	0.111	0.216	1
YIF1A	0.165581	-0.311705	0.111	0.216	1
PDLIM7	0.165797	-0.273347	0.111	0.223	1
PHIP	0.166002	-0.353887	0.333	0.433	1
FAM200B	0.166071	0.347108	0.556	0.518	1
RIDA	0.166195	-0.362355	0.111	0.209	1
GLO1	0.166429	-0.259631	0.37	0.553	1
TBL1X	0.166683	0.271252	0.37	0.273	1
KPNB1	0.166903	-0.293758	0.333	0.475	1
PPP2R3A	0.166932	-0.277764	0.037	0.124	1
TRIP11	0.166947	-0.310935	0.333	0.472	1
ARPC2	0.167069	-0.254221	0.889	0.904	1
CTSZ	0.167668	-0.324089	0.148	0.255	1
PLPP1	0.168119	-0.302011	0.333	0.468	1
CNN3	0.168837	-0.305984	0.296	0.415	1
YWHAZ	0.169047	-0.289487	0.556	0.667	1
WAC	0.170019	-0.250669	0.259	0.418	1
GPS1	0.171267	-0.322815	0.074	0.163	1
UQCRC1	0.171274	-0.307341	0.222	0.344	1
EEA1	0.171553	-0.266542	0.407	0.539	1
DPYS	0.171751	-0.314773	0.037	0.121	1
FLOT1	0.172077	-0.287478	0.111	0.22	1
RASL11B	0.172116	-0.309841	0.222	0.344	1
ZNF667-AS1	0.172626	0.293908	0.296	0.206	1
COMMD3	0.172864	-0.27298	0.111	0.213	1
SEPHS2	0.173073	-0.289066	0.111	0.22	1
SMIM20	0.173516	-0.270812	0.074	0.163	1
CTDNEP1	0.173516	-0.283489	0.074	0.163	1
AC016747.1	0.173749	-0.268028	0.074	0.174	1
CAMK2G	0.174101	-0.269776	0.074	0.17	1
AKAP13	0.17459	0.365732	0.296	0.213	1
RNPC3	0.174949	0.309606	0.222	0.131	1
DAB2	0.175267	-0.285429	0.741	0.773	1
PSMA4	0.175296	-0.322211	0.481	0.638	1
MGAT5	0.175618	-0.324272	0.296	0.415	1
LY6E	0.175678	-0.351697	0.593	0.645	1
TCF7L1	0.17698	-0.270984	0.148	0.266	1
ARHGEF37	0.177263	-0.32681	0.222	0.348	1
TMED9	0.177555	-0.293781	0.481	0.553	1
ACAA1	0.178118	-0.296701	0.111	0.22	1
CCBE1	0.178409	-0.267026	0.333	0.479	1
RAB11A	0.178714	-0.294206	0.222	0.33	1
UBE2E3	0.179251	-0.288222	0.148	0.262	1
SUMF1	0.180039	-0.283312	0.111	0.213	1
STOML2	0.18024	-0.297812	0.148	0.252	1
SLC17A5	0.180439	-0.254266	0.185	0.305	1
VPS13D	0.181187	0.313582	0.148	0.078	1
UFSP2	0.182402	-0.364525	0.296	0.379	1
JUNB	0.183293	0.265295	0.259	0.17	1
LIN52	0.18343	-0.25941	0.037	0.117	1
ZNF395	0.18343	-0.266143	0.037	0.117	1
THEM4	0.18343	-0.266267	0.037	0.117	1
LGALS2	0.18343	-0.318991	0.037	0.117	1
GLRX	0.18343	-0.377044	0.037	0.117	1
PSMA5	0.184474	-0.2776	0.148	0.248	1
SCD	0.186179	-0.291321	0.037	0.117	1
AAED1	0.186681	-0.267977	0.074	0.17	1
SMDT1	0.187175	-0.350349	0.407	0.525	1
MCUR1	0.18743	-0.283534	0.148	0.259	1
RPL10A	0.187461	-0.263275	0.667	0.748	1
HSD17B11	0.188295	-0.274804	0.074	0.167	1
PRPF4	0.188295	-0.302257	0.074	0.167	1
RNF150	0.188536	-0.295382	0.111	0.22	1
SIVA1	0.188714	0.296631	0.444	0.326	1
BNIP3	0.189073	-0.327647	0.296	0.397	1
LOX	0.189315	-0.270729	0.333	0.479	1
TIMMDC1	0.189357	-0.266966	0.296	0.415	1
HOXA9	0.190151	-0.283273	0.111	0.216	1
SUGT1	0.191307	0.276548	0.481	0.372	1
ELOVL4	0.192253	-0.291288	0.111	0.209	1
CCT2	0.192253	-0.299493	0.259	0.351	1
TM9SF2	0.194006	-0.300857	0.185	0.298	1
ZNF271P	0.194271	-0.25048	0.148	0.252	1
USP22	0.194658	-0.310685	0.111	0.199	1
ESYT2	0.194766	-0.281917	0.074	0.163	1
ZC2HC1A	0.195083	0.33047	0.333	0.252	1
TMEM205	0.196683	-0.251139	0.185	0.301	1
NSFL1C	0.196967	-0.265838	0.148	0.255	1
STAMBP	0.197109	0.258907	0.333	0.252	1
DDX21	0.197317	-0.304141	0.259	0.39	1
MIS18BP1	0.197353	-0.276899	0.037	0.113	1
RAPGEF2	0.197353	-0.256894	0.037	0.113	1
TRMT10A	0.197353	-0.265785	0.037	0.113	1
HRAS	0.197353	-0.284726	0.037	0.113	1
PDCL3	0.19738	-0.307532	0.148	0.252	1
FAM45A	0.198014	-0.315762	0.074	0.156	1
WFS1	0.198014	-0.318116	0.074	0.156	1
HACD2	0.198486	-0.286098	0.074	0.163	1
PRRC2C	0.198939	-0.297296	0.444	0.613	1
ATXN10	0.199954	-0.350196	0.37	0.493	1
CLDND2	0.201637	0.255947	0.185	0.11	1
ACOX1	0.201775	-0.272758	0.037	0.113	1
MEGF9	0.202483	0.268836	0.407	0.287	1
MICU2	0.202775	-0.262933	0.148	0.259	1
ANKRD12	0.202838	-0.30823	0.63	0.691	1
USP34	0.202879	-0.282387	0.111	0.206	1
ATP10A	0.202988	0.478901	0.222	0.152	1
CLCN3	0.203389	-0.291323	0.222	0.316	1
MYADM	0.203589	-0.275972	0.185	0.301	1
DNAJB6	0.204534	-0.261712	0.222	0.323	1
CDC40	0.2046	-0.35205	0.259	0.337	1
COMMD6	0.205773	-0.309912	0.444	0.543	1
SELENOS	0.207542	-0.290444	0.519	0.649	1
ITGA3	0.20758	-0.278662	0.296	0.418	1
CLIP1	0.207968	-0.299922	0.296	0.415	1
SNX5	0.210011	-0.37025	0.259	0.326	1
PRKDC	0.210128	0.283018	0.37	0.294	1
LDHB	0.210735	-0.331127	0.481	0.585	1
CYBA	0.211361	-0.253848	0.185	0.305	1
PHACTR2	0.21217	-0.294672	0.296	0.379	1
SHPRH	0.212313	-0.277926	0.037	0.11	1
SLC25A3	0.214035	-0.284916	0.556	0.652	1
APOE	0.216245	-0.482613	0.185	0.284	1
SUPT4H1	0.216245	-0.280735	0.185	0.284	1
RPL7A	0.21679	-0.282271	0.667	0.691	1
USP12	0.216857	0.311416	0.222	0.138	1
TIMM13	0.216939	-0.270914	0.333	0.429	1
FNDC3A	0.21772	0.283249	0.259	0.17	1
CISD3	0.218264	-0.304446	0.148	0.241	1
NAA10	0.219856	-0.260179	0.074	0.16	1
GNG12	0.220265	-0.25507	0.185	0.287	1
TALDO1	0.221651	-0.283585	0.333	0.429	1
PIN1	0.22212	-0.282573	0.185	0.291	1
VMA21	0.225081	-0.266522	0.111	0.195	1
NDUFV1	0.22517	-0.295277	0.148	0.241	1
MRPL1	0.225818	-0.310787	0.148	0.245	1
PPCS	0.225828	-0.331919	0.593	0.635	1
HINT2	0.227804	-0.316803	0.296	0.379	1
CDC42EP2	0.228102	-0.304201	0.111	0.206	1
RASSF8-AS1	0.228297	-0.286864	0.333	0.468	1
ANKRD28	0.230327	0.262971	0.111	0.057	1
PRKAG1	0.231434	-0.330753	0.074	0.149	1
CCDC148	0.231621	-0.28038	0.074	0.156	1
GTF2F1	0.23188	0.2976	0.37	0.284	1
CLU	0.233264	0.394156	0.296	0.22	1
SRPRA	0.233281	-0.28792	0.222	0.319	1
BROX	0.234064	0.347058	0.259	0.181	1
IFT74	0.234663	-0.28699	0.111	0.199	1
ZNF264	0.236702	0.266289	0.111	0.057	1
SLC4A4	0.238649	-0.474003	0.111	0.195	1
SNX13	0.23964	0.283967	0.185	0.117	1
IGF2R	0.241223	0.276075	0.185	0.117	1
STRAP	0.241699	-0.257804	0.259	0.351	1
C19orf70	0.242346	-0.263315	0.444	0.539	1
GSS	0.24539	-0.273298	0.074	0.145	1
DPEP1	0.245668	-0.301989	0.037	0.103	1
PIGK	0.245981	-0.257525	0.111	0.195	1
ZBTB4	0.245981	-0.281773	0.111	0.195	1
GOLGA7	0.246203	-0.254005	0.148	0.238	1
DYNC1I1	0.246225	-0.26211	0.074	0.149	1
TWSG1	0.24737	-0.28279	0.148	0.23	1
KPNA6	0.249853	-0.276316	0.222	0.319	1
MRPS31	0.250202	-0.357797	0.111	0.181	1
AKIRIN1	0.25148	-0.289229	0.185	0.28	1
ATP6V0E1	0.251946	-0.252544	0.556	0.652	1
APOOL	0.254069	0.357987	0.222	0.16	1
EVA1B	0.257564	-0.284833	0.296	0.408	1
MIOX	0.257831	-0.275758	0.111	0.202	1
TCF25	0.25835	-0.31797	0.556	0.596	1
GATC	0.259364	-0.263614	0.074	0.145	1
AIG1	0.259504	-0.262276	0.185	0.273	1
SLC3A2	0.259506	-0.307909	0.259	0.34	1
ACADSB	0.260093	-0.272038	0.074	0.149	1
BEX5	0.261117	-0.273374	0.111	0.195	1
RNF115	0.262102	-0.267131	0.185	0.259	1
PLXDC2	0.262629	0.357809	0.259	0.195	1
TAOK1	0.26283	-0.596336	0.185	0.309	1
MRPS18A	0.264733	-0.309155	0.148	0.22	1
AGMAT	0.264833	-0.260716	0.074	0.149	1
DENR	0.266542	-0.310065	0.296	0.365	1
SCN7A	0.2666	-0.27935	0.074	0.142	1
DCAF7	0.268052	-0.310986	0.259	0.333	1
ZNF593	0.271246	-0.292919	0.074	0.149	1
ARHGAP24	0.27253	0.298502	0.37	0.273	1
NFIC	0.272963	-0.315432	0.593	0.631	1
CHMP3	0.274399	-0.305894	0.259	0.355	1
ZDHHC4	0.27599	-0.255064	0.111	0.188	1
METTL21A	0.276411	0.258164	0.185	0.121	1
GPC6	0.277169	0.39311	0.333	0.234	1
CEP85L	0.27718	-0.277421	0.074	0.145	1
CNN2	0.277224	-0.286426	0.111	0.177	1
CIR1	0.279731	0.26177	0.481	0.422	1
LINC00667	0.279855	-0.250135	0.074	0.142	1
CCDC88A	0.281161	-0.417931	0.148	0.213	1
ACAP2	0.281431	-0.270188	0.296	0.39	1
SRSF3	0.281566	-0.275634	0.444	0.525	1
YAF2	0.281929	-0.321716	0.148	0.223	1
DCXR	0.28197	-0.326262	0.296	0.362	1
CTBP2	0.282334	-0.269939	0.185	0.262	1
APRT	0.285954	-0.280754	0.222	0.309	1
MRPL43	0.287165	-0.302976	0.296	0.358	1
MT1H	0.288002	-0.413527	0.111	0.188	1
TRAK2	0.288363	-0.250706	0.074	0.142	1
CHD9	0.291431	-0.34565	0.259	0.34	1
HDLBP	0.293061	0.276077	0.444	0.383	1
TAPBP	0.294905	-0.276394	0.296	0.387	1
ARPC1A	0.296674	-0.272627	0.185	0.255	1
ISG15	0.29673	-0.269923	0.148	0.227	1
TARID	0.299324	-0.284863	0.074	0.135	1
TIMM10	0.302938	-0.256501	0.074	0.135	1
UQCRFS1	0.306319	-0.277205	0.407	0.504	1
GLS	0.309932	-0.270585	0.222	0.294	1
AASDHPPT	0.31086	-0.290868	0.259	0.33	1
DPM2	0.313166	-0.294082	0.111	0.174	1
OSBP	0.313584	0.305277	0.148	0.096	1
ZNF638	0.313815	-0.265272	0.296	0.383	1
MTFR1L	0.3143	-0.2592	0.111	0.17	1
G3BP1	0.317982	-0.271299	0.333	0.408	1
UTRN	0.318316	-0.277278	0.37	0.475	1
ABHD14B	0.319358	-0.275198	0.111	0.17	1
CWF19L2	0.321417	0.300876	0.407	0.355	1
SAT1	0.321482	0.270765	0.481	0.426	1
PSMA1	0.322303	-0.257005	0.407	0.518	1
SH3KBP1	0.323634	-0.263052	0.111	0.177	1
ZCCHC11	0.323734	0.317065	0.444	0.376	1
AFDN	0.326165	0.456841	0.222	0.167	1
ARFGEF1	0.327907	-0.281229	0.111	0.17	1
LARP7	0.3281	-0.279848	0.667	0.738	1
NDUFAF2	0.328131	-0.267325	0.148	0.216	1
CITED2	0.328985	-0.313877	0.556	0.582	1
EAPP	0.332277	-0.320654	0.444	0.507	1
RHOT1	0.332531	0.265215	0.111	0.064	1
SSBP4	0.332642	-0.2546	0.111	0.167	1
IFT43	0.334199	0.257669	0.185	0.128	1
PHYHIP	0.33761	-0.261413	0.148	0.216	1
HSPA12A	0.340809	-0.264822	0.148	0.216	1
ADIRF	0.342221	0.542347	0.407	0.333	1
CERS6	0.343051	-0.276559	0.296	0.358	1
OTULIN	0.345548	0.26686	0.111	0.067	1
TAB2	0.350198	0.358169	0.148	0.096	1
VDAC3	0.351138	-0.279806	0.222	0.287	1
KAT7	0.351234	-0.25502	0.148	0.209	1
ZNF22	0.355238	-0.275939	0.259	0.323	1
IFT20	0.363598	0.307967	0.296	0.227	1
TMEM107	0.371029	-0.309031	0.148	0.206	1
GNAS	0.371378	-0.251103	0.778	0.837	1
LAMB2	0.376223	-0.263048	0.148	0.206	1
SMIM24	0.376223	-0.274183	0.148	0.206	1
EXPH5	0.376263	0.260584	0.481	0.454	1
GPI	0.382363	-0.263947	0.148	0.199	1
NUDT15	0.384587	-0.256635	0.148	0.202	1
MRPL14	0.389815	-0.319256	0.111	0.163	1
TIPRL	0.394512	-0.251922	0.148	0.195	1
LAGE3	0.396496	-0.254086	0.074	0.121	1
NT5DC1	0.396727	-0.272179	0.222	0.277	1
LEO1	0.405644	-0.265708	0.111	0.163	1
BAZ2B	0.419403	-0.294548	0.296	0.351	1
IMPA2	0.424255	-0.250033	0.074	0.117	1
2020-09-10	0.429799	0.252175	0.407	0.387	1
HMGN3-AS1	0.433533	-0.259453	0.222	0.273	1
NAP1L5	0.438977	0.344203	0.148	0.099	1
FAHD2A	0.439586	-0.283007	0.148	0.191	1
SCAMP3	0.445338	0.348264	0.185	0.149	1
ZNF146	0.449005	0.298679	0.148	0.103	1
TKT	0.449653	-0.253393	0.111	0.156	1
GALM	0.464942	-0.279193	0.111	0.156	1
DNAJB1	0.464974	0.370404	0.259	0.202	1
LIMS2	0.47017	-0.264736	0.185	0.227	1
NDUFS8	0.470472	-0.261099	0.37	0.436	1
SPARCL1	0.47594	0.483601	0.111	0.078	1
UBE2E2	0.480778	0.296764	0.37	0.326	1
SCRN2	0.481864	0.271447	0.222	0.177	1
AC244669.1	0.493122	-0.283512	0.222	0.259	1
LRP2	0.49883	-0.312291	0.148	0.181	1
GSTA1	0.511967	-0.497079	0.296	0.312	1
RPA3	0.515352	-0.327639	0.259	0.277	1
CLSTN1	0.520308	0.265181	0.296	0.262	1
WFDC2	0.521207	0.269742	0.148	0.113	1
HSD11B2	0.525689	0.470096	0.111	0.082	1
ALDH3B1	0.557239	0.386405	0.111	0.085	1
ADM	0.57769	-0.265064	0.296	0.333	1
VPS35	0.579996	0.272745	0.407	0.379	1
ERBIN	0.609199	-0.295381	0.444	0.418	1
JOSD2	0.611553	0.319521	0.148	0.117	1
DDX3X	0.622849	0.281608	0.185	0.152	1
AC008105.2	0.660668	0.268566	0.111	0.092	1
SHTN1	0.661781	0.256692	0.296	0.284	1
YWHAH	0.682339	0.37397	0.259	0.252	1
C1D	0.846082	0.270176	0.37	0.351	1
CMBL	0.875439	-0.255365	0.296	0.294	1
LARP1B	0.978751	0.251131	0.111	0.113	1

## Sheet: EC
gene id	p value	avg logFC	pct.1	pct.2	adjusted p value
HLA-DRB5	1.7e-99	-1.9575	0.036	0.818	4.02e-95
MT-RNR1	1.61e-56	0.869549	1	1	3.8e-52
GPX3	1.02e-51	-2.25274	0.338	0.915	2.41e-47
ALDOB	2.23e-41	-1.85921	0.17	0.693	5.27e-37
RPS4Y1	7.6e-32	-0.606739	0.048	0.426	1.8e-27
FCN3	1.12e-31	-1.13084	0.15	0.591	2.66e-27
FABP1	4.46e-31	-0.974829	0.02	0.324	1.06e-26
FTL	7.42e-30	-1.40941	0.884	0.994	1.76e-25
APOE	2.39e-27	-1.15598	0.162	0.562	5.67e-23
IL1RL1	1.87e-26	-2.21415	0.054	0.364	4.43e-22
POSTN	2.18e-26	-1.92078	0.044	0.341	5.17e-22
GSTA1	6.31e-26	-1.35301	0.074	0.403	1.49e-21
FAM151A	3.21e-24	-0.637014	0.024	0.278	7.61e-20
QPRT	9.01e-23	-1.11044	0.07	0.364	2.13e-18
UBC	3.88e-22	-0.477224	0.742	0.966	9.19e-18
UGT2B7	1.76e-21	-1.18127	0.12	0.449	4.16e-17
FTH1	2.38e-21	-0.656975	0.922	0.994	5.62e-17
BHMT2	8.9e-21	-1.03292	0.09	0.381	2.1e-16
CHRDL1	1e-20	-0.734756	0.034	0.278	2.37e-16
MTND1P23	1.38e-20	1.72462	0.478	0.114	3.27e-16
ACSM2A	2.19e-20	-1.07516	0.094	0.381	5.18e-16
IFITM3	4.11e-20	-0.566588	0.948	0.989	9.73e-16
EIF1AY	4.63e-20	-0.404467	0.022	0.244	1.1e-15
FGB	6.65e-20	-0.595929	0.004	0.176	1.57e-15
CRHBP	7.66e-20	-0.859801	0.438	0.761	1.81e-15
ATP5F1E	8.61e-20	-0.637052	0.74	0.943	2.04e-15
LGALS3BP	1.58e-19	-0.693098	0.11	0.403	3.74e-15
ACSM2B	1.73e-19	-0.917146	0.07	0.341	4.1e-15
SLC16A9	2.14e-19	-0.965367	0.078	0.352	5.06e-15
HPD	2.2e-19	-0.557563	0.022	0.233	5.21e-15
NQO1	1.32e-18	-0.618515	0.202	0.528	3.13e-14
CTSA	2.48e-18	-0.587023	0.216	0.551	5.87e-14
A2M	2.68e-18	-0.89509	0.836	0.943	6.34e-14
CRYAB	3.88e-18	-1.23719	0.278	0.597	9.18e-14
SLC5A12	2.26e-17	-0.716539	0.068	0.318	5.34e-13
SLC22A6	2.98e-17	-0.491674	0.02	0.205	7.05e-13
ITGA8	5.76e-17	-0.767173	0.1	0.369	1.36e-12
RNASE1	8.3e-17	0.642922	0.928	0.795	1.96e-12
SLC13A1	1.09e-16	-0.921889	0.052	0.273	2.59e-12
CYP4F3	1.26e-16	-0.498165	0.008	0.165	2.98e-12
S100A11	1.62e-16	-0.602794	0.582	0.841	3.84e-12
COX8A	1.83e-16	-0.546693	0.356	0.688	4.33e-12
AKR1B10	2.1e-16	-0.447235	0	0.131	4.98e-12
MGLL	5.63e-16	-0.807763	0.216	0.494	1.33e-11
CALM1	6.37e-16	-0.411837	0.922	0.994	1.51e-11
PDZK1IP1	8.33e-16	-0.870569	0.128	0.403	1.97e-11
SLC4A4	9e-16	-0.859077	0.08	0.312	2.13e-11
UQCRQ	1.16e-15	-0.564168	0.526	0.847	2.75e-11
PDGFRB	1.41e-15	-0.440084	0.02	0.193	3.33e-11
GATA3	1.45e-15	-0.87469	0.086	0.324	3.42e-11
SLC13A3	1.88e-15	-0.591371	0.028	0.21	4.44e-11
ACTB	2.31e-15	-0.416979	0.842	0.994	5.46e-11
GAPDH	3.15e-15	-0.512673	0.768	0.926	7.45e-11
DPEP1	3.32e-15	-0.525677	0.032	0.216	7.85e-11
EHD3	3.8e-15	-0.786771	0.128	0.398	8.99e-11
AGMAT	4.42e-15	-0.620371	0.052	0.261	1.05e-10
PLTP	6.12e-15	-0.594819	0.04	0.233	1.45e-10
CXCL14	1.18e-14	-0.99559	0.254	0.551	2.8e-10
DNASE1L3	1.7e-14	1.11864	0.494	0.182	4.02e-10
MIOX	2.25e-14	-0.72692	0.066	0.284	5.32e-10
PLPP3	4.24e-14	-0.896127	0.584	0.773	1e-09
FABP4	4.78e-14	-0.732718	0.026	0.193	1.13e-09
BGN	4.82e-14	-0.847547	0.07	0.278	1.14e-09
AGXT2	5.82e-14	-0.496907	0.024	0.188	1.38e-09
DBI	6.62e-14	-0.665253	0.472	0.733	1.57e-09
SLC22A8	9.91e-14	-0.620442	0.032	0.205	2.34e-09
SERPING1	1.07e-13	-0.506789	0.406	0.699	2.54e-09
XIST	1.83e-13	0.655806	0.254	0	4.34e-09
ABCC2	2.05e-13	-0.419758	0.01	0.142	4.85e-09
ATOX1	2.13e-13	-0.553139	0.342	0.619	5.03e-09
IQGAP2	2.21e-13	-0.456539	0.1	0.335	5.23e-09
ACSL1	2.5e-13	-0.600283	0.074	0.278	5.92e-09
CHCHD10	3.39e-13	-0.587444	0.276	0.568	8.03e-09
MAF	3.63e-13	-0.549317	0.294	0.602	8.59e-09
SEPT4	5.57e-13	-0.503491	0.058	0.256	1.32e-08
SOD3	7.04e-13	-0.551528	0.068	0.267	1.67e-08
ECHS1	9.59e-13	-0.723224	0.282	0.545	2.27e-08
NOX4	1.01e-12	-0.336434	0.018	0.159	2.39e-08
GATA3-AS1	1.15e-12	-0.323754	0.01	0.136	2.73e-08
DAAM2	1.17e-12	-0.454816	0.02	0.165	2.77e-08
GPX1	1.19e-12	-0.488935	0.432	0.722	2.81e-08
ACO1	1.21e-12	-0.502049	0.076	0.278	2.86e-08
ASS1	1.5e-12	-0.646531	0.236	0.511	3.54e-08
DDC	1.72e-12	-0.500609	0.04	0.21	4.06e-08
CES2	2.68e-12	-0.737339	0.136	0.358	6.35e-08
AKR1C1	3.2e-12	-0.530971	0.024	0.17	7.57e-08
MT-TP	3.26e-12	0.725506	0.678	0.466	7.72e-08
UGT3A1	4.12e-12	-0.312432	0.018	0.153	9.74e-08
NFKBIZ	4.75e-12	1.37681	0.444	0.159	1.12e-07
C3orf85	4.86e-12	-0.293405	0.01	0.131	1.15e-07
TPM1	5.16e-12	-0.738373	0.304	0.557	1.22e-07
LGALS1	5.61e-12	-0.719203	0.578	0.79	1.33e-07
CMBL	6.18e-12	-0.924371	0.146	0.369	1.46e-07
GNPDA1	7.01e-12	-0.426139	0.046	0.216	1.66e-07
TPM2	7.08e-12	-0.603371	0.072	0.267	1.67e-07
AL365357.1	8.42e-12	0.503453	0.224	0	1.99e-07
RRAS	1.52e-11	-0.550948	0.242	0.494	3.6e-07
SPOCK1	1.52e-11	-0.251552	0.006	0.114	3.61e-07
SOST	1.53e-11	-0.554493	0.146	0.392	3.61e-07
SLC22A12	1.56e-11	-0.302335	0.008	0.119	3.7e-07
IFI6	1.61e-11	-0.626902	0.516	0.744	3.8e-07
LGMN	1.69e-11	-0.463385	0.078	0.273	4e-07
NRGN	2.01e-11	-0.607792	0.106	0.312	4.76e-07
MARCKS	2.04e-11	0.964786	0.468	0.21	4.82e-07
NDUFA4L2	2.26e-11	-0.433853	0.022	0.159	5.36e-07
FHL2	2.51e-11	-0.333117	0.014	0.136	5.95e-07
SPP1	2.69e-11	-0.427534	0.468	0.744	6.38e-07
SUCLG1	2.81e-11	-0.686603	0.55	0.767	6.65e-07
FAH	3.17e-11	-0.309827	0.028	0.17	7.51e-07
LGALS2	3.18e-11	-0.551238	0.064	0.244	7.51e-07
SLC7A8	3.85e-11	-0.537418	0.046	0.205	9.12e-07
EVA1B	4.45e-11	-0.537552	0.25	0.5	1.05e-06
SLC34A1	5.37e-11	-0.460806	0.024	0.159	1.27e-06
AP1M2	5.38e-11	-0.392855	0.02	0.148	1.27e-06
PHTF2	6.99e-11	-0.360997	0.032	0.176	1.65e-06
MGST3	7.69e-11	-0.442615	0.468	0.716	1.82e-06
RIDA	7.98e-11	-0.441468	0.062	0.233	1.89e-06
NKAIN4	8.64e-11	-0.36689	0.014	0.131	2.04e-06
LRP2	1.07e-10	-0.564499	0.098	0.295	2.54e-06
PTH1R	1.3e-10	-0.598585	0.104	0.307	3.07e-06
CUBN	1.37e-10	-0.647121	0.088	0.278	3.24e-06
CFL1	1.54e-10	-0.400717	0.58	0.852	3.64e-06
CTSB	1.82e-10	-0.72194	0.442	0.653	4.31e-06
PRAP1	2.56e-10	-0.275629	0.006	0.102	6.06e-06
EMID1	2.72e-10	-0.310006	0.02	0.142	6.44e-06
NDUFB2	2.75e-10	-0.420541	0.498	0.75	6.52e-06
PAPPA	2.79e-10	-0.396046	0.018	0.136	6.61e-06
APOM	3.5e-10	-0.320629	0.032	0.17	8.27e-06
GPD1	3.53e-10	-0.322713	0.014	0.125	8.35e-06
MAPT	3.8e-10	-0.295311	0.014	0.125	8.99e-06
ACKR1	3.94e-10	0.940929	0.218	0.011	9.33e-06
CCDC80	4.73e-10	-0.540771	0.066	0.233	1.12e-05
ATP5ME	4.79e-10	-0.44485	0.546	0.756	1.13e-05
TMEM192	5.22e-10	-0.45911	0.102	0.295	1.23e-05
RARRES3	5.28e-10	-0.449955	0.276	0.523	1.25e-05
RAB29	5.29e-10	-0.469464	0.11	0.301	1.25e-05
MGST1	5.32e-10	-0.549281	0.068	0.233	1.26e-05
WFDC1	5.68e-10	-0.42793	0.056	0.216	1.34e-05
RBM3	6.28e-10	-0.333157	0.318	0.568	1.48e-05
ACADSB	6.36e-10	-0.444088	0.064	0.227	1.51e-05
MTCO1P23	6.77e-10	0.467561	0.188	0	1.6e-05
ATP5MPL	8.43e-10	-0.41675	0.474	0.716	1.99e-05
FIS1	9.1e-10	-0.435012	0.374	0.625	2.15e-05
HSP90AB1	9.18e-10	0.568631	0.946	0.949	2.17e-05
GATM	1.01e-09	-0.920224	0.162	0.358	2.4e-05
ICAM2	1.05e-09	-0.493869	0.414	0.676	2.49e-05
TCEAL9	1.09e-09	-0.46538	0.47	0.699	2.57e-05
AK4	1.2e-09	-0.580452	0.094	0.273	2.84e-05
SLC9A3R1	1.2e-09	-0.37258	0.058	0.216	2.84e-05
PALLD	1.28e-09	-0.337493	0.086	0.267	3.02e-05
GJA4	1.45e-09	-0.511784	0.13	0.33	3.43e-05
PLAC9	1.53e-09	-0.472614	0.134	0.335	3.63e-05
MT1X	1.58e-09	-0.295444	0.278	0.517	3.75e-05
CPM	1.59e-09	-0.515706	0.142	0.341	3.76e-05
TBCA	1.82e-09	-0.402513	0.376	0.602	4.3e-05
LDHB	1.96e-09	-0.65288	0.508	0.739	4.65e-05
DCXR	2.43e-09	-0.427328	0.18	0.392	5.75e-05
UQCR10	2.53e-09	-0.434841	0.396	0.625	5.99e-05
MYL9	2.54e-09	-0.715486	0.194	0.398	6.01e-05
DDX3Y	2.56e-09	-0.251923	0.044	0.193	6.05e-05
SLC2A2	2.73e-09	-0.308547	0.02	0.131	6.47e-05
LMO7	3.01e-09	-0.346123	0.142	0.352	7.12e-05
MYL6	3.04e-09	-0.328546	0.816	0.966	7.18e-05
COX14	3.47e-09	-0.488316	0.254	0.477	8.21e-05
ROMO1	3.9e-09	-0.432242	0.46	0.699	9.23e-05
GSTO1	3.93e-09	-0.360708	0.362	0.608	9.29e-05
AGTR1	4.01e-09	-0.42558	0.018	0.125	9.49e-05
GPM6A	4.19e-09	0.582413	0.204	0.017	9.92e-05
SLC28A1	4.42e-09	-0.337273	0.012	0.108	0.000104593
ATP5IF1	5.42e-09	-0.439215	0.53	0.75	0.000128137
POMP	5.43e-09	-0.452933	0.484	0.727	0.00012841
TNFSF10	6e-09	0.611473	0.768	0.744	0.00014207
SFRP1	8.06e-09	0.727322	0.314	0.097	0.000190686
EMCN	9.23e-09	-0.464227	0.768	0.903	0.0002183
ATP5MC3	1.02e-08	-0.395511	0.402	0.648	0.000240365
CD99	1.02e-08	-0.443878	0.418	0.653	0.000240533
KHK	1.17e-08	-0.384893	0.03	0.148	0.000277349
HMOX1	1.18e-08	-0.376644	0.02	0.125	0.000279006
MME	1.19e-08	-0.357535	0.062	0.216	0.000282105
GALM	1.21e-08	-0.529201	0.07	0.222	0.000285773
CALD1	1.23e-08	-0.745341	0.576	0.744	0.000292118
HECW2	1.35e-08	-0.36761	0.062	0.21	0.000320002
AEBP1	1.38e-08	-0.430368	0.09	0.256	0.000326241
SOX4	1.43e-08	0.557712	0.604	0.398	0.000338748
ATF5	1.49e-08	-0.26199	0.04	0.17	0.000351721
NDUFB7	1.52e-08	-0.344673	0.296	0.534	0.000358968
OSBPL1A	1.71e-08	-0.399471	0.174	0.369	0.000404297
C11orf54	1.98e-08	-0.620221	0.24	0.432	0.000468836
PFN2	1.99e-08	-0.306235	0.082	0.244	0.000471185
PIPOX	2.02e-08	-0.252627	0.016	0.114	0.000478242
IFITM2	2.07e-08	-0.418307	0.844	0.898	0.000488787
PTGR1	2.48e-08	-0.338103	0.118	0.301	0.000586958
ENPEP	2.5e-08	-0.355159	0.034	0.153	0.000590958
DPYS	2.68e-08	-0.362632	0.034	0.153	0.000635239
ALDH8A1	2.76e-08	-0.296663	0.024	0.131	0.000654097
UTRN	2.84e-08	0.633882	0.662	0.511	0.00067108
MAP3K5	2.87e-08	-0.263661	0.024	0.131	0.00067861
MT1E	3.07e-08	-0.26273	0.352	0.602	0.000726231
ACP5	3.62e-08	-0.269517	0.02	0.119	0.000856218
PTGDS	3.68e-08	-0.371637	0.046	0.176	0.000870949
HMGCL	3.72e-08	-0.331035	0.082	0.239	0.000880714
ZEB2	4.25e-08	-0.337952	0.102	0.273	0.00100656
ETFB	4.36e-08	-0.428621	0.168	0.358	0.00103188
RAPGEF4	4.68e-08	-0.329396	0.192	0.392	0.00110699
TAGLN	5.36e-08	-0.593841	0.106	0.273	0.00126828
ALPL	5.53e-08	-0.269547	0.038	0.159	0.00130838
C1R	6.66e-08	-0.354081	0.106	0.273	0.00157494
NDUFA13	6.78e-08	-0.314594	0.408	0.631	0.00160485
QDPR	6.8e-08	-0.379043	0.084	0.233	0.00160805
BBOX1	7.23e-08	-0.558393	0.074	0.216	0.00171038
FBP1	7.81e-08	-0.391347	0.052	0.182	0.00184842
PSAT1	8.01e-08	-0.288795	0.026	0.131	0.0018962
CMTM8	8.38e-08	-0.362345	0.142	0.324	0.00198261
CNGA1	8.78e-08	-0.274331	0.016	0.108	0.00207713
EGFL7	1.03e-07	-0.320018	0.322	0.54	0.00244838
LAMTOR5	1.14e-07	-0.429913	0.306	0.523	0.00270753
PECAM1	1.16e-07	0.477428	0.8	0.665	0.00275097
PDK4	1.35e-07	-0.357904	0.168	0.364	0.0032007
PGK1	1.57e-07	-0.25369	0.344	0.58	0.00372172
NDUFA4	1.67e-07	-0.364625	0.642	0.858	0.00395179
FRZB	1.87e-07	-0.359504	0.05	0.176	0.00442671
NDUFB1	2.01e-07	-0.334376	0.492	0.71	0.00475724
BEST1	2.03e-07	-0.261305	0.04	0.153	0.00479918
ATP5MD	2.14e-07	-0.302258	0.446	0.67	0.00507395
CYB5A	2.31e-07	-0.321662	0.324	0.545	0.00545745
SELENBP1	2.36e-07	-0.265642	0.046	0.165	0.00557903
ENTPD5	2.42e-07	-0.286894	0.054	0.182	0.00572515
MT-TS2	2.43e-07	0.535658	0.344	0.142	0.00575078
ADGRG1	2.51e-07	-0.387756	0.142	0.301	0.00594368
HLA-A	2.91e-07	-0.272746	0.766	0.955	0.00687559
TXNDC17	2.92e-07	-0.373565	0.262	0.46	0.0069015
RAB31	2.92e-07	-0.337992	0.192	0.381	0.00690776
AKR1A1	2.92e-07	-0.49619	0.148	0.318	0.00691529
PSMC2	2.98e-07	-0.318473	0.118	0.278	0.00704707
NDUFS6	3.05e-07	-0.2865	0.33	0.551	0.0072106
NDUFA6	3.05e-07	-0.339614	0.294	0.5	0.00721918
LAPTM4B	3.08e-07	-0.433353	0.202	0.381	0.00729388
CCND1	3.15e-07	-0.311995	0.438	0.693	0.00744203
CYBA	3.23e-07	-0.492551	0.182	0.358	0.00763401
ATP6V1G1	3.23e-07	-0.251435	0.53	0.727	0.00764525
ACOT7	3.38e-07	-0.295818	0.046	0.165	0.00800877
CDV3	3.43e-07	0.479104	0.338	0.136	0.0081091
ANPEP	3.6e-07	-0.340489	0.046	0.165	0.00851699
GHITM	3.66e-07	-0.382657	0.3	0.483	0.0086554
ELOB	3.73e-07	-0.347771	0.55	0.733	0.00882461
DAB2	3.73e-07	-0.274682	0.534	0.75	0.00882575
PPCS	3.98e-07	-0.371808	0.292	0.472	0.00941713
SELP	4.07e-07	0.578488	0.208	0.045	0.00961996
DNAJC15	4.25e-07	-0.347882	0.344	0.545	0.0100458
FRG1BP	4.81e-07	-0.254314	0.088	0.239	0.0113699
MTND4P12	4.9e-07	1.02157	0.194	0.04	0.0115835
GAMT	5.59e-07	-0.351671	0.052	0.17	0.0132377
2020-09-11	5.67e-07	-0.40623	0.232	0.409	0.0134089
COX6B1	5.75e-07	-0.338418	0.54	0.727	0.0135929
BLOC1S1	5.84e-07	-0.329172	0.27	0.466	0.0138266
PBLD	5.97e-07	-0.523122	0.114	0.261	0.0141174
ANK2	6.02e-07	-0.373813	0.066	0.199	0.0142446
GLRX	6.04e-07	-0.373392	0.192	0.381	0.0142789
NDUFA1	6.27e-07	-0.30326	0.568	0.756	0.0148356
AIFM1	6.82e-07	-0.346553	0.074	0.205	0.0161471
FADS1	7.12e-07	-0.298895	0.058	0.182	0.0168545
GLRX5	7.34e-07	-0.309192	0.178	0.358	0.0173727
PPIA	7.5e-07	-0.311328	0.654	0.824	0.0177342
PLPP1	7.6e-07	-0.321454	0.64	0.812	0.0179741
UBL5	7.69e-07	-0.321862	0.502	0.71	0.0181992
PGPEP1	7.7e-07	-0.354124	0.078	0.21	0.0182267
NAT8	8.19e-07	-0.506904	0.148	0.312	0.0193779
TPD52L1	9.86e-07	0.50944	0.164	0.023	0.0233327
RBM47	1e-06	-0.53078	0.134	0.284	0.0236902
SMIM4	1.04e-06	-0.301386	0.092	0.233	0.0245238
MAP3K13	1.05e-06	-0.273417	0.254	0.455	0.0249253
HMGN5	1.06e-06	-0.310405	0.144	0.312	0.0251019
UQCR11	1.07e-06	-0.280061	0.53	0.733	0.0252951
FAM89A	1.07e-06	-0.262924	0.062	0.188	0.025418
CPE	1.08e-06	0.83953	0.182	0.034	0.0256047
TP53I11	1.24e-06	-0.364656	0.112	0.256	0.0292355
MFSD12	1.25e-06	-0.26427	0.03	0.125	0.0295864
RBPMS	1.28e-06	-0.2878	0.18	0.352	0.0302465
TRIM6	1.51e-06	-0.290493	0.024	0.114	0.0357311
COX7A2	1.53e-06	-0.276201	0.578	0.761	0.0361842
PEBP1	1.53e-06	-0.422176	0.63	0.83	0.0362942
MRPL52	1.61e-06	-0.368656	0.228	0.415	0.0380691
CTNNAL1	1.72e-06	0.571711	0.45	0.273	0.0407728
PEPD	1.85e-06	-0.445456	0.226	0.392	0.0436846
PDLIM1	1.93e-06	-0.362872	0.168	0.335	0.0457316
MTATP6P1	1.98e-06	0.325203	0.954	0.932	0.04681
MT-ND4L	1.99e-06	0.297193	0.954	0.977	0.0471647
ACAT1	2.02e-06	-0.385152	0.41	0.602	0.0478477
RCAN1	2.1e-06	-0.359918	0.082	0.21	0.0497607
FERMT2	2.11e-06	-0.285845	0.372	0.551	0.0499024
FOXC1	2.12e-06	0.602525	0.274	0.108	0.0502195
SOD1	2.13e-06	-0.276548	0.61	0.801	0.050437
TMSB10	2.14e-06	-0.276632	0.932	0.983	0.0506307
COPS9	2.31e-06	-0.285932	0.398	0.58	0.0546304
GOT1	2.33e-06	-0.265178	0.064	0.182	0.0551347
SEPHS2	2.37e-06	-0.428943	0.184	0.347	0.0559967
COX7B	2.38e-06	-0.285524	0.436	0.625	0.0562269
MIGA1	2.49e-06	-0.28629	0.116	0.261	0.0589929
VPS28	2.53e-06	-0.347499	0.21	0.375	0.0597651
C12orf57	2.53e-06	-0.399686	0.404	0.585	0.0599024
C19orf70	2.59e-06	-0.354253	0.26	0.449	0.0613773
STK17B	2.6e-06	-0.286655	0.076	0.205	0.0614317
GCHFR	2.67e-06	-0.287971	0.044	0.148	0.0631958
MRPL33	2.7e-06	-0.308186	0.446	0.653	0.0639048
IDH1	2.7e-06	-0.320605	0.076	0.199	0.0639451
NDUFA11	2.93e-06	-0.296704	0.404	0.602	0.0692933
MRPL20	2.94e-06	-0.275026	0.23	0.409	0.0696177
SLIRP	2.98e-06	-0.343512	0.298	0.483	0.0705759
COX4I1	3.01e-06	-0.307918	0.596	0.801	0.0711539
PPP1R12A	3.09e-06	-0.289003	0.368	0.562	0.0730829
TXN	3.16e-06	-0.422416	0.556	0.722	0.0746719
TM4SF18	3.3e-06	0.531685	0.622	0.466	0.0781082
SUB1	3.36e-06	-0.266997	0.388	0.591	0.0796144
ATP5F1A	3.49e-06	-0.365264	0.384	0.551	0.0825128
ALDH4A1	3.87e-06	-0.298236	0.042	0.142	0.0915876
EHHADH	4.03e-06	-0.330722	0.076	0.199	0.0953912
LAMA2	4.04e-06	-0.263808	0.032	0.125	0.0956305
PIEZO2	4.06e-06	-0.277843	0.068	0.188	0.0960331
PLEKHB2	4.16e-06	-0.353828	0.18	0.341	0.0984848
SH3KBP1	4.31e-06	-0.332349	0.19	0.352	0.10191
NDUFS5	4.32e-06	-0.34924	0.486	0.665	0.102129
SAT2	4.37e-06	-0.387496	0.128	0.273	0.103487
IDH2	4.56e-06	-0.319848	0.184	0.347	0.107967
MTRNR2L1	4.61e-06	0.494656	0.158	0.028	0.109139
COX7C	4.63e-06	-0.259559	0.7	0.903	0.109473
C11orf96	4.66e-06	0.537774	0.228	0.074	0.110194
FAHD1	4.76e-06	-0.435132	0.13	0.273	0.112706
EFEMP2	4.87e-06	-0.269384	0.072	0.193	0.115277
MAOA	4.89e-06	-0.299623	0.054	0.165	0.115656
COX6C	5.03e-06	-0.273084	0.686	0.852	0.119109
GNG12	5.14e-06	-0.300186	0.172	0.33	0.121705
H2AFJ	5.28e-06	-0.293508	0.188	0.352	0.125005
EHD4	5.35e-06	0.556709	0.29	0.131	0.126665
ABRACL	5.39e-06	-0.316612	0.084	0.21	0.127519
IFI27L2	5.89e-06	-0.286192	0.14	0.295	0.139264
RAC1	6.35e-06	-0.299943	0.78	0.966	0.150338
ACTG1	6.39e-06	-0.256718	0.698	0.92	0.151156
ALDH1A1	6.59e-06	-0.412048	0.146	0.29	0.155962
COX5B	6.8e-06	-0.26979	0.542	0.761	0.16089
FGL2	6.83e-06	-0.269446	0.24	0.42	0.161507
ENOSF1	7.51e-06	-0.254651	0.104	0.239	0.17758
SLCO3A1	7.71e-06	-0.292246	0.15	0.301	0.182427
PCK1	7.86e-06	-0.301209	0.074	0.193	0.186059
LACTB2	8e-06	-0.272646	0.132	0.273	0.189311
ACSF2	8.5e-06	-0.250271	0.034	0.125	0.20119
TGFB1I1	8.52e-06	-0.316515	0.044	0.142	0.201625
SLC31A1	8.79e-06	-0.287819	0.072	0.188	0.207879
PGM5	9.06e-06	0.384299	0.136	0.017	0.214337
MEIS2	9.22e-06	0.462237	0.636	0.517	0.218116
ACTN4	9.76e-06	-0.326856	0.448	0.619	0.231037
EFNB1	1.01e-05	-0.313212	0.17	0.33	0.240109
SEMA3D	1.04e-05	0.503857	0.124	0.011	0.244976
VDAC1	1.04e-05	-0.30004	0.316	0.483	0.247116
CHDH	1.05e-05	-0.272842	0.042	0.136	0.248506
FN1	1.05e-05	0.714879	0.428	0.256	0.248898
SNX27	1.19e-05	-0.263818	0.088	0.21	0.281744
GSTA2	1.26e-05	-0.252469	0.032	0.119	0.298047
LAMB2	1.29e-05	-0.287737	0.142	0.284	0.304151
SLC17A5	1.3e-05	-0.298324	0.06	0.165	0.30803
MTSS1	1.31e-05	-0.280046	0.242	0.403	0.308943
MRPL27	1.35e-05	-0.267446	0.148	0.295	0.320565
SPRY1	1.39e-05	-0.303414	0.342	0.517	0.328368
VIM	1.45e-05	0.485562	0.772	0.71	0.344203
DDIT3	1.54e-05	0.680381	0.228	0.085	0.364612
JUN	1.57e-05	0.453764	0.846	0.739	0.370741
SPARCL1	1.63e-05	0.861707	0.434	0.301	0.385106
HDGFL3	1.72e-05	0.434383	0.354	0.188	0.407705
BRK1	1.82e-05	-0.261001	0.406	0.574	0.431295
PLVAP	1.83e-05	0.52671	0.514	0.358	0.431799
CNDP2	1.89e-05	-0.327418	0.16	0.301	0.447293
C19orf53	1.93e-05	-0.27825	0.316	0.477	0.45584
CAT	1.96e-05	-0.298682	0.194	0.347	0.462935
CLU	2.05e-05	0.653563	0.542	0.386	0.485237
ALDH6A1	2.18e-05	-0.44641	0.236	0.386	0.515965
FOSB	2.3e-05	0.788181	0.354	0.199	0.544642
GALNT15	2.39e-05	0.584383	0.162	0.04	0.566389
CLTRN	2.41e-05	-0.250483	0.06	0.165	0.569912
SMIM24	2.43e-05	-0.444731	0.134	0.267	0.57404
DEPP1	2.59e-05	-0.416256	0.158	0.295	0.611623
VWF	2.73e-05	0.517969	0.154	0.034	0.645422
SUCLG2	2.93e-05	-0.363193	0.202	0.341	0.692919
IER2	3.02e-05	0.650393	0.644	0.528	0.713491
HCFC1R1	3.04e-05	-0.259141	0.18	0.324	0.719125
PTTG1IP	3.19e-05	0.31782	0.826	0.79	0.754414
SLC12A1	3.24e-05	0.575945	0.238	0.091	0.76549
COX5A	3.25e-05	-0.28152	0.304	0.472	0.767933
HSPG2	3.34e-05	0.460445	0.404	0.244	0.789096
ALKBH7	3.37e-05	-0.316117	0.206	0.347	0.797418
ENO1	3.39e-05	-0.357807	0.36	0.523	0.802057
GLUD1	3.83e-05	-0.308872	0.22	0.369	0.906108
ATP5F1D	3.94e-05	-0.295003	0.288	0.443	0.932645
IL3RA	4.1e-05	-0.274177	0.05	0.142	0.969902
ID3	4.32e-05	-0.322514	0.594	0.739	1
RALA	4.43e-05	-0.398822	0.322	0.466	1
DMAC1	4.43e-05	-0.307132	0.146	0.278	1
ADD3	4.49e-05	-0.370601	0.398	0.534	1
VPS29	4.61e-05	-0.26428	0.23	0.381	1
PMAIP1	4.65e-05	0.577646	0.148	0.034	1
RPL23A	4.7e-05	0.375143	0.798	0.79	1
EIF4A2	4.84e-05	0.53301	0.55	0.426	1
GADD45B	4.91e-05	0.487592	0.652	0.557	1
LMO4	5.21e-05	-0.257656	0.26	0.415	1
APRT	5.48e-05	-0.297983	0.228	0.381	1
BTBD3	5.62e-05	-0.331369	0.162	0.295	1
NDUFS1	5.92e-05	-0.301143	0.252	0.403	1
PRAF2	6.32e-05	-0.254448	0.158	0.295	1
NDUFA3	6.35e-05	-0.38633	0.416	0.568	1
CD63	6.49e-05	-0.294595	0.668	0.818	1
MRPL23	6.85e-05	-0.303649	0.102	0.216	1
MMAB	7.02e-05	-0.258054	0.064	0.165	1
CXCL2	7.07e-05	0.618186	0.218	0.085	1
NDUFS8	7.48e-05	-0.251333	0.212	0.352	1
PAXX	7.59e-05	-0.250572	0.13	0.256	1
TPI1	8.35e-05	-0.273208	0.55	0.727	1
KMT2E	8.46e-05	0.429776	0.702	0.608	1
ZEB1	8.61e-05	0.48165	0.586	0.5	1
BNIP3L	8.73e-05	-0.263182	0.2	0.352	1
CST3	8.77e-05	-0.322498	0.52	0.688	1
TACSTD2	9.01e-05	0.369516	0.114	0.017	1
LAMTOR4	9.25e-05	-0.276071	0.338	0.494	1
RGS2	9.52e-05	-0.278397	0.136	0.261	1
SYNPO2	9.69e-05	-0.258733	0.056	0.148	1
DNAJA1	9.87e-05	0.843947	0.806	0.807	1
MYO6	0.000101656	-0.319664	0.242	0.375	1
SLC37A4	0.000109739	-0.269482	0.054	0.142	1
JUNB	0.000111586	0.558695	0.612	0.5	1
NDUFC1	0.000128071	-0.263938	0.502	0.648	1
ACAA1	0.000129544	-0.289854	0.106	0.21	1
ITM2A	0.000139336	0.426204	0.586	0.466	1
MIR4458HG	0.000140591	-0.283661	0.128	0.244	1
NR2F1	0.000145747	0.418332	0.164	0.051	1
MIEN1	0.000160388	-0.318805	0.242	0.369	1
UMOD	0.000181388	0.535747	0.266	0.131	1
NDFIP1	0.000182475	-0.250562	0.29	0.432	1
CAVIN3	0.00018372	-0.294701	0.198	0.33	1
PRSS23	0.000186479	0.341951	0.258	0.119	1
POLR2G	0.000189225	-0.259898	0.184	0.312	1
PODXL	0.000189469	-0.27079	0.408	0.574	1
BEX5	0.0001916	-0.469615	0.276	0.415	1
PLEKHA2	0.000196634	-0.271766	0.042	0.119	1
ID1	0.000197524	-0.317597	0.702	0.801	1
XAF1	0.000204507	0.510271	0.356	0.216	1
SELE	0.000206216	0.508754	0.128	0.028	1
SCAND1	0.000213648	-0.275752	0.258	0.398	1
FAM84B	0.00024074	0.365189	0.15	0.045	1
SMAD1	0.000250659	0.367871	0.182	0.068	1
DNAJB1	0.000258152	0.645693	0.622	0.517	1
PRELID1	0.00026516	-0.264652	0.212	0.341	1
AKAP12	0.000265888	-0.319653	0.374	0.523	1
GPX4	0.000269704	-0.371612	0.41	0.545	1
IMPA2	0.000271493	-0.264627	0.07	0.159	1
VEGFC	0.000275387	0.332256	0.122	0.028	1
JAM2	0.000292089	0.478254	0.268	0.142	1
S100A10	0.000293335	0.290531	0.752	0.722	1
CAV1	0.000295366	0.603617	0.328	0.193	1
NPDC1	0.0002957	-0.290329	0.39	0.528	1
ICAM1	0.00029774	0.792669	0.384	0.256	1
ISG15	0.000300392	-0.291457	0.362	0.517	1
DUSP6	0.000300481	0.526389	0.256	0.131	1
BCAM	0.000338498	0.284657	0.196	0.08	1
ANK3	0.00034348	-0.26173	0.172	0.29	1
NUAK1	0.000344086	0.48303	0.192	0.08	1
DPP4	0.000413204	-0.258389	0.06	0.142	1
BEX3	0.000446976	-0.26122	0.48	0.614	1
CYYR1	0.000460143	0.462466	0.42	0.307	1
ATP6V1E1	0.000492234	-0.265939	0.244	0.364	1
AKR1C3	0.000493751	-0.327194	0.11	0.21	1
TBC1D4	0.000499735	0.334892	0.116	0.028	1
FGFR1	0.000507363	0.349579	0.26	0.136	1
KNG1	0.000526281	0.626003	0.208	0.097	1
HSP90B1	0.000548974	0.260487	0.85	0.903	1
HSPA1B	0.000568489	0.604927	0.372	0.25	1
TXNIP	0.000569475	0.341013	0.862	0.852	1
SNRPC	0.000598729	-0.25731	0.278	0.403	1
MYOF	0.000611501	0.256792	0.15	0.051	1
IRF1	0.000637506	0.683062	0.44	0.318	1
DDT	0.000650202	-0.356365	0.212	0.318	1
MTCH2	0.0007054	-0.25487	0.134	0.239	1
PATJ	0.000709598	-0.280475	0.104	0.199	1
AP1S2	0.000719497	0.372797	0.522	0.398	1
C1D	0.000782352	-0.291053	0.168	0.267	1
2020-09-06	0.000794705	0.385414	0.264	0.142	1
LIMCH1	0.000806053	0.376814	0.694	0.67	1
STMN1	0.000832951	0.258164	0.294	0.165	1
FAM171A1	0.000833063	0.264208	0.122	0.034	1
FLNB	0.000865565	0.374356	0.216	0.108	1
C3orf58	0.000952835	0.401983	0.128	0.04	1
PDIA3	0.000960169	0.273961	0.816	0.818	1
ASAP2	0.00100399	0.31083	0.25	0.131	1
LIFR	0.00102397	0.37706	0.24	0.131	1
PABPC1	0.00105441	0.331939	0.878	0.881	1
CEACAM1	0.00106178	0.446294	0.282	0.165	1
WWTR1	0.00106291	0.494834	0.4	0.295	1
IL33	0.00114867	0.417547	0.17	0.068	1
GRINA	0.00115024	-0.299174	0.134	0.233	1
TMEM43	0.00120404	0.276582	0.194	0.091	1
MT-TL1	0.00121225	-0.276674	0.49	0.619	1
GRHPR	0.00121872	-0.260912	0.16	0.261	1
MDFIC	0.00130161	0.33362	0.254	0.142	1
RSRP1	0.00135288	0.503615	0.396	0.295	1
SMARCC1	0.00136173	-0.266537	0.206	0.312	1
HEG1	0.00152001	0.348815	0.422	0.295	1
EGR1	0.00161175	0.485513	0.472	0.341	1
PTPRB	0.00162723	0.349216	0.598	0.5	1
CTSC	0.00166037	0.334346	0.286	0.165	1
CCL2	0.00166773	0.641912	0.312	0.199	1
EIF3K	0.00171066	-0.271014	0.436	0.54	1
PLXDC2	0.00177593	-0.25358	0.142	0.239	1
WWP1	0.00179988	0.348173	0.196	0.097	1
PLK2	0.00189445	0.547236	0.3	0.193	1
ATP5MC1	0.00195524	-0.258326	0.256	0.364	1
PAWR	0.00201439	-0.270761	0.106	0.193	1
HSPA2	0.00204087	0.267467	0.102	0.028	1
DHX29	0.00204163	-0.271365	0.212	0.312	1
HSPH1	0.0020786	0.685263	0.514	0.415	1
TEK	0.00208742	0.410711	0.47	0.375	1
BTG1	0.00213426	0.433508	0.714	0.665	1
TKT	0.00222022	-0.35437	0.168	0.267	1
RPL9P9	0.00222157	0.407592	0.46	0.369	1
MRPS10	0.00222406	-0.261118	0.178	0.273	1
SAT1	0.00243692	0.34931	0.616	0.545	1
KLF4	0.00246067	0.611422	0.346	0.239	1
FOS	0.00251369	0.428129	0.678	0.591	1
RBBP6	0.0025324	0.673566	0.5	0.409	1
FRMD4B	0.00254833	0.356605	0.338	0.222	1
WFDC2	0.00261241	0.427699	0.2	0.102	1
PKP4	0.0026165	0.354774	0.274	0.17	1
PHF3	0.00282204	0.334762	0.486	0.369	1
SLC39A10	0.00285253	0.317986	0.258	0.148	1
YBX1	0.00300319	0.293012	0.696	0.699	1
NDUFS2	0.00301156	-0.257897	0.182	0.278	1
KLF10	0.00305553	0.450571	0.3	0.199	1
HSP90AA1	0.00309728	-0.276342	0.952	0.989	1
MAFF	0.00310671	0.348467	0.122	0.045	1
TAOK1	0.00312339	0.58093	0.262	0.386	1
BIRC3	0.00321692	0.446442	0.168	0.08	1
MPZL2	0.00336034	0.358978	0.114	0.04	1
EIF5	0.00338621	0.382733	0.704	0.676	1
REV3L	0.00351768	0.290473	0.184	0.091	1
HSP90AB3P	0.00352934	0.639102	0.294	0.199	1
CCNL1	0.00359625	0.658698	0.456	0.375	1
NUCB2	0.00362616	0.356508	0.688	0.642	1
CRIM1	0.00369427	0.420242	0.422	0.324	1
NOSTRIN	0.0038645	0.395604	0.662	0.636	1
ELK3	0.00392819	0.405411	0.518	0.455	1
ING1	0.00418642	0.344615	0.144	0.062	1
CAVIN2	0.00419467	0.34205	0.638	0.585	1
HEXIM1	0.00436544	0.377212	0.212	0.119	1
KHDRBS3	0.00448711	0.271956	0.144	0.062	1
NFKBIA	0.00459904	0.338423	0.8	0.795	1
PLSCR1	0.00466261	0.322735	0.38	0.278	1
NEAT1	0.00468331	-0.713393	0.246	0.347	1
SMCHD1	0.00474254	0.448775	0.316	0.222	1
TSC22D2	0.00495674	0.298832	0.138	0.062	1
ELF2	0.00507804	0.309983	0.318	0.21	1
RHOB	0.00510961	-0.255297	0.382	0.494	1
AL118516.1	0.00528607	0.305525	0.116	0.045	1
ATRX	0.00533832	0.302674	0.694	0.659	1
GBP4	0.00533841	0.379181	0.564	0.494	1
PHF14	0.00541139	0.309246	0.36	0.256	1
ZFAS1	0.00582482	0.289089	0.352	0.244	1
DHRS7	0.00604114	0.28034	0.386	0.284	1
PPP1R10	0.00611109	0.467515	0.276	0.176	1
ZFHX3	0.00622644	0.269892	0.238	0.142	1
MAL	0.00623334	0.331016	0.282	0.182	1
NR4A2	0.00634449	0.365487	0.106	0.04	1
ADI1	0.00635726	-0.261107	0.254	0.352	1
HMGB2	0.00660526	0.377383	0.264	0.17	1
LMO2	0.00662424	0.279151	0.48	0.398	1
TBC1D15	0.00676483	0.355498	0.286	0.193	1
UACA	0.00705987	0.406399	0.7	0.659	1
ZC3HAV1	0.00713426	0.440461	0.19	0.108	1
KLHL5	0.00714857	0.276784	0.292	0.188	1
ZFP36L1	0.00730588	0.302657	0.702	0.676	1
ATF3	0.00739789	0.421664	0.454	0.364	1
RASAL2	0.00795911	0.360365	0.216	0.131	1
LAYN	0.00845211	0.250073	0.15	0.074	1
GIMAP4	0.00864009	0.381976	0.528	0.483	1
CCDC69	0.00870076	0.340243	0.252	0.165	1
EMP3	0.00907594	-0.384031	0.344	0.426	1
CEP68	0.0091287	0.384316	0.206	0.125	1
SDCBP	0.00938289	0.458211	0.464	0.409	1
GIMAP7	0.00942654	0.300108	0.69	0.67	1
SELENON	0.00970633	0.329976	0.17	0.091	1
ARL5B	0.00982096	0.263204	0.126	0.057	1
RAMP3	0.00983296	0.346568	0.642	0.608	1
CHD3	0.0100685	0.280464	0.176	0.097	1
RASSF9	0.0101797	0.387242	0.152	0.08	1
LEPR	0.0107801	0.415866	0.108	0.045	1
HSPA1A	0.0110414	0.560854	0.69	0.636	1
ARHGAP26	0.0111454	0.311393	0.132	0.062	1
MT-TV	0.0112525	0.278829	0.656	0.659	1
FAM13C	0.0114693	0.328511	0.114	0.051	1
HIST1H4C	0.0123322	0.268097	0.678	0.665	1
HLA-DRA	0.0125488	0.280707	0.826	0.818	1
DDX5	0.0128766	0.406037	0.736	0.756	1
MTCO1P12	0.0129374	0.338121	0.452	0.364	1
VAMP2	0.0130214	-0.251203	0.432	0.523	1
TIPARP	0.0131172	0.318378	0.114	0.051	1
BTG2	0.013585	0.284281	0.224	0.136	1
COL3A1	0.0142504	0.65436	0.174	0.108	1
TSPAN7	0.0151981	0.285382	0.394	0.318	1
CLIC2	0.0162981	0.300474	0.224	0.142	1
OXR1	0.0163533	0.352589	0.296	0.21	1
MX1	0.0163569	0.453207	0.24	0.165	1
RBM39	0.0166491	0.326527	0.636	0.619	1
NAMPT	0.0172235	0.387606	0.202	0.131	1
CBX1	0.0177829	0.275695	0.326	0.239	1
MOSPD2	0.0187271	0.272548	0.168	0.097	1
PNRC1	0.0187338	0.267497	0.692	0.67	1
CALCOCO2	0.0188991	0.395484	0.472	0.432	1
THSD7A	0.0191058	0.283924	0.242	0.153	1
MACF1	0.0194687	0.345025	0.41	0.33	1
EPB41L4A	0.0195736	0.260556	0.224	0.142	1
SLK	0.0202768	0.285391	0.676	0.648	1
YWHAE	0.0206609	0.2524	0.696	0.722	1
SMURF2	0.0210988	0.271946	0.108	0.051	1
ERG	0.0233516	0.31283	0.372	0.29	1
DDX3X	0.0233984	0.359297	0.336	0.261	1
SLU7	0.0252797	0.337246	0.336	0.256	1
GSN	0.0255109	0.2501	0.6	0.562	1
LIMA1	0.0282663	0.29004	0.652	0.625	1
CD59	0.0289624	0.298526	0.666	0.665	1
SUN1	0.0292668	0.271058	0.196	0.125	1
FABP5	0.0296403	0.510606	0.124	0.068	1
BAZ2B	0.0296546	0.379993	0.36	0.295	1
PTPRM	0.0298633	0.289639	0.28	0.205	1
MAN1A1	0.0328121	0.276249	0.222	0.148	1
DDX60	0.0341366	0.307371	0.218	0.148	1
PAF1	0.0341725	0.279897	0.21	0.142	1
GIMAP6	0.0345112	0.329772	0.254	0.188	1
ZNF638	0.0355008	0.26927	0.348	0.273	1
HNRNPA2B1	0.041141	0.313852	0.644	0.619	1
IKBIP	0.0418455	0.251739	0.216	0.148	1
EPC1	0.0423914	0.278037	0.302	0.233	1
AP3B1	0.0424267	0.264666	0.218	0.153	1
SASH1	0.0438293	0.257468	0.284	0.21	1
IRX3	0.0438445	0.262464	0.366	0.295	1
PTMAP2	0.0461115	0.332032	0.536	0.477	1
FCHO2	0.0462082	0.27032	0.314	0.244	1
SKIL	0.0470783	0.324004	0.436	0.375	1
CCDC47	0.0501287	0.287209	0.358	0.29	1
RBM22	0.0521694	0.277788	0.248	0.182	1
PIAS1	0.0523152	0.346486	0.212	0.153	1
ODF2L	0.052649	0.350687	0.306	0.239	1
S1PR1	0.0534181	0.291278	0.184	0.125	1
ARL6IP1	0.0570147	0.365727	0.432	0.364	1
LEO1	0.0575663	0.263915	0.234	0.17	1
DPYSL2	0.0580312	0.250935	0.514	0.483	1
AMD1	0.058189	0.360162	0.3	0.239	1
SETX	0.058891	0.250178	0.276	0.21	1
TMEM123	0.0592165	0.267643	0.326	0.267	1
ABI1	0.0602824	0.28227	0.218	0.159	1
C1orf21	0.0622133	0.37518	0.284	0.227	1
REL	0.062263	0.297529	0.13	0.08	1
SUPT5H	0.0628361	0.259313	0.19	0.131	1
USP15	0.0659988	0.28211	0.178	0.125	1
VCAM1	0.0688959	0.544344	0.244	0.199	1
ASRGL1	0.0700023	0.264179	0.286	0.222	1
SOCS3	0.0718108	0.350803	0.202	0.148	1
CD24	0.0748398	0.29866	0.23	0.176	1
JAG1	0.0761073	0.257955	0.206	0.148	1
SETD2	0.0801484	0.293071	0.39	0.341	1
MAFB	0.0813276	0.278298	0.172	0.119	1
SPTY2D1	0.0816835	0.267496	0.256	0.193	1
NR2F2	0.0845464	0.356892	0.526	0.5	1
PCF11	0.0867421	0.329196	0.282	0.222	1
ABI3BP	0.0884325	-0.340813	0.148	0.199	1
AHR	0.0908289	0.270208	0.108	0.068	1
PI16	0.091599	-0.396598	0.1	0.142	1
HSPA6	0.0933602	0.322913	0.104	0.062	1
ZFP36	0.0936078	0.297144	0.43	0.375	1
CHORDC1	0.0946521	0.411169	0.218	0.165	1
LMCD1	0.100002	0.343317	0.17	0.125	1
CCT2	0.100377	0.257446	0.324	0.273	1
EIF4G3	0.104029	0.271233	0.36	0.307	1
FGFR1OP2	0.105887	0.259976	0.26	0.21	1
RSL24D1	0.106134	0.250722	0.252	0.199	1
NPNT	0.106199	0.264309	0.134	0.091	1
PDE2A	0.107156	0.274238	0.158	0.114	1
CXCL12	0.108307	0.287877	0.272	0.216	1
KMT2C	0.109044	0.287098	0.414	0.364	1
FAM192A	0.109832	0.251723	0.308	0.25	1
MMRN2	0.114304	0.277987	0.362	0.307	1
RAB8B	0.134577	0.27765	0.18	0.136	1
CXCL10	0.135046	-0.55011	0.076	0.114	1
ING2	0.139689	0.251636	0.104	0.068	1
TTC3	0.139729	0.289885	0.398	0.358	1
TMEM52B	0.140534	0.658104	0.172	0.131	1
CWC25	0.143326	0.330027	0.236	0.193	1
ZNF37A	0.144091	0.282559	0.122	0.085	1
HNRNPA3	0.14465	0.256324	0.542	0.54	1
RBM17	0.148836	0.281389	0.42	0.392	1
WSB1	0.15494	0.3071	0.462	0.443	1
CLK1	0.155795	0.396187	0.276	0.233	1
NASP	0.157209	0.310115	0.296	0.261	1
DUSP1	0.162719	0.338365	0.56	0.54	1
ARL4A	0.164307	0.297674	0.224	0.188	1
PMP22	0.17063	0.262656	0.366	0.324	1
BAG3	0.177507	0.296663	0.172	0.136	1
IFI44L	0.178338	0.42149	0.3	0.267	1
YES1	0.186259	0.296929	0.258	0.216	1
DIS3	0.190492	0.261533	0.23	0.188	1
TSPYL2	0.19312	0.289591	0.128	0.097	1
UGCG	0.199536	0.289477	0.272	0.239	1
TACC1	0.201436	0.290018	0.59	0.608	1
TUBA1A	0.202158	0.285858	0.314	0.29	1
EMP1	0.204835	0.287099	0.434	0.403	1
SERPINE2	0.208939	0.393133	0.154	0.21	1
PDIA3P1	0.210763	0.310754	0.168	0.136	1
ANXA1	0.227234	0.276884	0.48	0.449	1
EDN1	0.227507	-0.528414	0.21	0.239	1
ASPH	0.236225	0.251887	0.336	0.307	1
UPP1	0.242959	0.257907	0.18	0.148	1
HLA-DQA1	0.250741	0.317778	0.44	0.46	1
SLFN5	0.255578	0.276609	0.466	0.438	1
AIF1L	0.257944	0.251969	0.286	0.261	1
SSFA2	0.258381	0.274716	0.272	0.239	1
ZCCHC24	0.27102	0.253331	0.136	0.108	1
CDKN2AIP	0.274339	0.299234	0.204	0.176	1
IFIT2	0.286615	-0.433632	0.306	0.335	1
NUFIP2	0.289076	0.372798	0.3	0.278	1
SRSF2	0.302816	0.270084	0.304	0.284	1
HLA-DMA	0.309622	0.27043	0.37	0.375	1
S100A4	0.326611	0.269695	0.378	0.358	1
HSPE1	0.338107	0.440992	0.55	0.562	1
EIF4A3	0.339181	0.396991	0.332	0.312	1
SRSF7	0.36221	0.283105	0.354	0.341	1
ATP1B1	0.36991	0.395937	0.502	0.517	1
MAP1LC3B	0.375031	0.319586	0.394	0.381	1
IGFBP4	0.381077	0.260072	0.628	0.693	1
HSPD1	0.402879	0.290177	0.598	0.58	1
CRBN	0.444331	0.296502	0.426	0.438	1
BRD2	0.457267	0.369731	0.41	0.426	1
TOPORS	0.45897	0.325779	0.226	0.21	1
CDKN1A	0.458985	0.434344	0.24	0.227	1
TJP1	0.475032	0.264754	0.442	0.443	1
ENPP2	0.483446	0.375719	0.134	0.119	1
TFPI	0.491217	0.343882	0.35	0.352	1
BCLAF1	0.563741	0.32912	0.596	0.636	1
RAP1A	0.576517	0.269333	0.314	0.307	1
TRA2B	0.604522	0.369225	0.382	0.386	1
HSPA8	0.610256	0.256028	0.664	0.716	1
ELOC	0.721958	0.273325	0.336	0.347	1
IGFBP7	0.774937	-0.413828	0.94	0.926	1
SLC14A1	0.838101	0.421197	0.266	0.278	1
RBP7	0.844068	0.943602	0.272	0.29	1
FMO2	0.850985	0.495029	0.156	0.176	1
CCL5	0.908247	-0.293751	0.108	0.102	1
