# Supplementary material for: A Partial Picture of the Single-Cell Transcriptomics of Human IgA Nephropathy
Source: Front Immunol. 2021 Apr 16;12:645988. doi: 10.3389/fimmu.2021.645988 (PMC8085501; doi:10.3389/fimmu.2021.645988)
Supplement: Supplemental Table 5 — DEGs in immune cells from IgAN and control subjects. [file Table_5.xlsx]

## Sheet: MON
gene_id	p_val	avg_logFC	pct.1	pct.2	p_val_adj
FTL	6.59704e-07	-0.764411	1	1	0.0156086
HLA-DRB5	2.13729e-06	-1.64772	0	0.643	0.0505683
SOD2	2.62089e-06	-1.32563	0.44	0.857	0.0620102
MT-RNR1	8.20728e-06	0.82658	1	1	0.194184
ACSL1	2.39046e-05	-1.09302	0.28	0.857	0.565583
ACSM2B	3.66414e-05	-1.51637	0.04	0.607	0.866936
MT-ND2	3.79613e-05	0.614174	1	1	0.898164
FABP5	9.87053e-05	1.9841	0.6	0.143	1
YBX1	0.000110111	0.75658	0.96	0.893	1
ATP1B3	0.000125778	1.2957	0.76	0.25	1
NEAT1	0.000201611	-0.921051	0.44	0.857	1
SLC2A3	0.000249085	-1.12985	0.08	0.571	1
AREG	0.000271756	1.67134	0.4	0	1
ACP5	0.000278658	-0.902093	0	0.429	1
GPX3	0.000281848	-1.46471	0.52	0.893	1
SERPINB1	0.000287386	-0.947264	0.4	0.821	1
ACSM2A	0.00032735	-1.08665	0.08	0.607	1
PTMA	0.000332162	0.713358	1	1	1
AQP9	0.000358247	-1.0538	0.08	0.536	1
MT-ND4	0.000449477	0.370393	1	1	1
GAPDH	0.00047463	-0.723639	0.8	0.964	1
RGS2	0.000518127	1.03587	0.76	0.25	1
MTATP6P1	0.000682249	0.780303	0.92	0.857	1
MT-ATP6	0.000749172	0.440937	1	1	1
PDZK1IP1	0.000786868	-1.21661	0.24	0.679	1
QPRT	0.000811479	-1.18645	0.16	0.607	1
HLA-DRB1	0.000824182	0.96506	0.92	0.821	1
UBC	0.000835275	-0.714685	0.92	1	1
TNFAIP2	0.000966504	-0.916412	0.32	0.786	1
MTND1P23	0.000996551	1.62607	0.44	0.071	1
NQO1	0.00115671	-1.20012	0	0.357	1
PPP1R2	0.00124435	-0.840697	0.08	0.464	1
TNFAIP6	0.00129497	-0.84697	0.16	0.643	1
H3F3B	0.00138245	0.609704	1	0.929	1
IQGAP1	0.0015056	-0.675512	0.36	0.821	1
PEPD	0.00159689	-0.790389	0.12	0.536	1
BHMT2	0.00170447	-0.973548	0.2	0.607	1
TALDO1	0.00197321	-0.850315	0.16	0.536	1
SLC22A8	0.00197481	-0.847243	0.08	0.464	1
MAFB	0.00206425	-0.910968	0.44	0.857	1
PRPF40A	0.00208019	-0.765007	0.36	0.786	1
NORAD	0.00210334	-0.786302	0.04	0.393	1
TSPAN14	0.00228391	-0.693393	0	0.321	1
PTGR1	0.00228391	-0.722708	0	0.321	1
SAP30BP	0.00228391	-0.782572	0	0.321	1
FGB	0.00228391	-0.94326	0	0.321	1
SRP14	0.00247565	-0.734886	0.44	0.857	1
MT-ND4L	0.00251717	0.64815	0.96	0.857	1
CD74	0.00267952	0.638682	1	0.929	1
GATAD1	0.00272116	-0.94677	0.08	0.429	1
ACAT1	0.00276261	-0.879118	0.24	0.607	1
UQCRFS1	0.0027861	-0.849631	0.16	0.536	1
PLEK	0.0027945	-0.751699	0.76	0.929	1
EEF1A1	0.00292446	0.444151	0.96	0.964	1
MT-TP	0.00296656	0.991559	0.64	0.286	1
DDX3Y	0.00302145	-0.82943	0.16	0.607	1
FABP1	0.00311344	-1.07069	0.12	0.5	1
HNRNPUL1	0.00316072	-0.703067	0.08	0.429	1
PDIA3	0.0035363	0.779753	0.88	0.643	1
CYBB	0.0035689	-0.596632	0.64	0.964	1
SNHG8	0.00383031	0.71092	0.52	0.143	1
CASP4	0.00410072	-0.49939	0.12	0.5	1
ZC3H15	0.00415954	-0.870367	0.16	0.536	1
CCL4L2	0.00424707	-2.13648	0.32	0.643	1
DYNC1LI2	0.00442577	-0.570359	0	0.286	1
USF3	0.00442577	-0.603074	0	0.286	1
UBXN6	0.00442577	-0.610882	0	0.286	1
MRPS10	0.00442577	-0.658484	0	0.286	1
AKR1B10	0.00442577	-0.820856	0	0.286	1
S100A8	0.00459443	-1.87598	0.36	0.679	1
ACAA1	0.00486603	-0.677848	0.24	0.607	1
CCL4	0.00498938	-1.52284	0.32	0.679	1
ADD3	0.00512976	-0.895465	0.24	0.571	1
ALDOB	0.00514022	-0.849885	0.36	0.75	1
HSP90AA1	0.00523527	-0.405253	1	1	1
LDLR	0.0052567	-0.933593	0.08	0.429	1
HLA-DQB1	0.00530078	1.06907	0.6	0.357	1
DDC	0.00547761	-0.721318	0.04	0.357	1
DBI	0.00571687	-0.699988	0.44	0.821	1
TOP1	0.00580057	-0.84447	0.32	0.714	1
NCF1C	0.00586353	-0.751046	0.16	0.5	1
CCND2	0.00594173	0.874529	0.32	0.036	1
SLC2A6	0.00605243	-0.971565	0.08	0.429	1
CSF3R	0.00619991	-0.788092	0.08	0.393	1
CD300E	0.00619991	-0.853182	0.08	0.393	1
LTA4H	0.00631962	-0.581976	0.12	0.464	1
MID1IP1	0.00645468	0.899426	0.32	0.036	1
HMOX1	0.00667046	-0.835577	0.32	0.679	1
NPM1	0.00668153	0.530084	0.8	0.643	1
PMM2	0.00684805	0.874297	0.24	0	1
MTCO1P23	0.00684805	0.769025	0.24	0	1
MAL	0.00684805	0.723484	0.24	0	1
ATP11A	0.00684805	0.717195	0.24	0	1
MECP2	0.00684805	0.634106	0.24	0	1
HMGA1	0.00684805	0.624629	0.24	0	1
TMEM9B	0.00684805	0.54985	0.24	0	1
XIST	0.00684805	0.546354	0.24	0	1
AC099560.2	0.00700713	0.910488	0.32	0.036	1
PIM3	0.007103	-0.712713	0.16	0.5	1
NDUFV1	0.00746925	-0.646281	0.04	0.321	1
PFKFB3	0.00746925	-0.832815	0.04	0.321	1
TMBIM6	0.00783028	-0.506159	0.72	0.964	1
YPEL5	0.00800553	0.808255	0.36	0.071	1
IL10RA	0.00800553	-0.457526	0.04	0.357	1
ATP5MPL	0.00806406	-0.654841	0.36	0.75	1
NCKAP1L	0.00807147	-0.756544	0.04	0.321	1
RGCC	0.00822632	1.15878	0.4	0.107	1
SERPINB9	0.00832603	-0.650182	0.24	0.607	1
LMO2	0.00843286	-0.532688	0	0.25	1
SLC20A1	0.00843286	-0.572537	0	0.25	1
FPR2	0.00843286	-0.597414	0	0.25	1
AC245128.3	0.00843286	-0.704689	0	0.25	1
CRTAM	0.00843286	-0.887229	0	0.25	1
CXCR4	0.00857096	0.853559	0.6	0.286	1
IFIH1	0.00871679	-0.71087	0.04	0.321	1
RBM47	0.00893565	-0.481983	0.28	0.643	1
PTPRC	0.00921406	-0.596064	0.64	0.929	1
HSPA1A	0.00952415	-0.465444	0.92	0.964	1
CRYAB	0.00961634	-1.474	0.28	0.571	1
C4orf3	0.00966653	-0.525732	0.2	0.536	1
HIGD2A	0.00969819	-0.518813	0.16	0.5	1
YBX3	0.0097414	0.716568	0.76	0.464	1
CD63	0.00984638	-0.398226	0.44	0.821	1
ECHS1	0.0099975	-0.78465	0.28	0.643	1
PPCS	0.0102548	-0.682491	0.12	0.429	1
SLC13A1	0.0102548	-1.03579	0.12	0.429	1
RASSF4	0.0103088	-0.618198	0.16	0.5	1
DPYS	0.0104321	-0.430611	0.08	0.429	1
FAM49A	0.0109381	-0.645925	0.04	0.321	1
VMP1	0.011082	-0.60177	0.24	0.607	1
CD46	0.011581	0.9062	0.4	0.107	1
ZNF267	0.011581	0.679381	0.4	0.107	1
DIAPH2	0.011581	-0.466757	0.08	0.393	1
TKT	0.0116308	-0.656212	0.32	0.679	1
ARPC5L	0.0117833	-0.695275	0.04	0.321	1
GCA	0.011866	-0.482347	0.08	0.357	1
DOCK2	0.011866	-0.584521	0.08	0.357	1
MGST1	0.0118846	-0.790411	0.16	0.464	1
ETFB	0.0118956	-0.704757	0.12	0.393	1
KLHL18	0.0123196	0.45236	0.28	0.036	1
ZFC3H1	0.0126858	-0.585779	0.04	0.321	1
NDUFS4	0.0126858	-0.602261	0.04	0.321	1
BRD4	0.012794	-0.511598	0.12	0.464	1
CCL3L1	0.0130876	-2.16351	0.24	0.536	1
LSM3	0.0132317	-0.563989	0.08	0.393	1
NDUFA2	0.013233	-0.665218	0.12	0.429	1
LILRB2	0.0132603	-0.725841	0.32	0.643	1
CD52	0.0133427	-0.589104	0.48	0.714	1
FAM151A	0.0136066	-0.826633	0.08	0.357	1
MARCKSL1	0.013649	-0.530546	0.04	0.321	1
BSG	0.0138608	-0.699542	0.2	0.5	1
IFITM2	0.0139011	-0.37972	0.36	0.714	1
TRAM1	0.0141325	-0.573872	0.08	0.393	1
RHOG	0.0145113	-0.530609	0.2	0.536	1
GZF1	0.0146211	0.690201	0.2	0	1
ZNF292	0.0146211	0.616466	0.2	0	1
GAPVD1	0.0146211	0.570422	0.2	0	1
EPB41L4A	0.0146211	0.560871	0.2	0	1
DDX50	0.0146211	0.548185	0.2	0	1
ANKRD36C	0.0146211	0.543025	0.2	0	1
HDAC9	0.0146211	0.526498	0.2	0	1
PIGT	0.0146211	0.523156	0.2	0	1
PARVA	0.0146211	0.502435	0.2	0	1
ST3GAL5	0.0146211	0.469683	0.2	0	1
UBA3	0.0146211	0.44866	0.2	0	1
WDFY3-AS2	0.0146211	0.432307	0.2	0	1
SLC39A10	0.0146211	0.430785	0.2	0	1
GTF2A1	0.0146211	0.350233	0.2	0	1
SYF2	0.0147777	-0.468866	0.36	0.643	1
FFAR2	0.014779	-0.672921	0.04	0.286	1
HMGB2	0.014779	-0.676545	0.04	0.286	1
CYP4F3	0.014779	-0.75683	0.04	0.286	1
CD93	0.0155691	-0.653065	0.08	0.357	1
MARCO	0.0158357	-0.472768	0	0.214	1
ENOPH1	0.0158357	-0.473878	0	0.214	1
ZFAND3	0.0158357	-0.480013	0	0.214	1
ZSCAN16-AS1	0.0158357	-0.529129	0	0.214	1
ARID1A	0.0158357	-0.561471	0	0.214	1
CMAS	0.0158357	-0.565949	0	0.214	1
ABHD6	0.0158357	-0.577116	0	0.214	1
RAB1B	0.0158357	-0.648862	0	0.214	1
PLEKHA1	0.0158357	-0.663949	0	0.214	1
PTGS2	0.0158357	-0.673356	0	0.214	1
MAOA	0.0158357	-0.69353	0	0.214	1
NAPRT	0.0158357	-0.704299	0	0.214	1
ALDH7A1	0.0158357	-0.721205	0	0.214	1
WBP4	0.0158357	-0.761412	0	0.214	1
DNAAF1	0.0159301	-0.617319	0.04	0.286	1
RGS1	0.0159448	1.11566	0.44	0.143	1
UGP2	0.0163782	-0.787437	0.12	0.393	1
S100A9	0.0164268	-1.31138	0.48	0.75	1
MT-ND1	0.0164876	0.388488	1	1	1
RPS27	0.0165529	0.40437	0.92	1	1
AK4	0.0165576	-0.544427	0.16	0.5	1
HLA-DPA1	0.0168831	0.66616	0.88	0.714	1
DOK2	0.0171594	-0.681738	0.04	0.286	1
NFIB	0.0171594	-0.738984	0.04	0.286	1
CST3	0.0173432	0.549735	1	0.964	1
CAP1	0.0175189	-0.662067	0.4	0.679	1
SGK1	0.0176572	0.762682	0.6	0.286	1
PRR13	0.0180137	-0.507265	0.12	0.429	1
ATP2B1	0.0181336	-0.354901	0.48	0.821	1
DUSP23	0.0189795	-0.288419	0.08	0.357	1
RTN4	0.0189911	-0.493351	0.4	0.786	1
RPL7	0.0190815	0.325638	0.88	0.929	1
ALDH2	0.0191337	-0.4378	0.12	0.429	1
CHCHD10	0.0191767	-0.845182	0.24	0.5	1
EIF1B	0.0196298	-0.632384	0.28	0.571	1
SFT2D1	0.0198697	-0.517268	0.04	0.286	1
MSRB1	0.0198697	-0.56199	0.04	0.286	1
PSMD1	0.0198697	-0.63257	0.04	0.286	1
RPS6	0.0200527	0.383501	0.88	1	1
UGT2B7	0.0200678	-0.797694	0.28	0.643	1
CALM3	0.0206686	-0.494284	0.16	0.429	1
RAC1P2	0.02075	-0.516848	0.08	0.321	1
SNX5	0.0209716	-0.603724	0.12	0.393	1
ATP5IF1	0.0211228	-0.565795	0.28	0.643	1
RPS16	0.0214443	0.489783	0.96	0.821	1
PTH1R	0.0221745	-0.732639	0.08	0.321	1
SOX4	0.022282	1.27483	0.4	0.143	1
NME1	0.0223905	0.637537	0.32	0.071	1
TBCA	0.0226291	-0.576882	0.24	0.536	1
EEF1D	0.0228144	0.679117	0.64	0.393	1
RETREG1	0.0229465	-0.617265	0.04	0.286	1
UBE2J1	0.023026	-0.514306	0.08	0.357	1
GSTA1	0.0237637	-0.786454	0.24	0.571	1
CLU	0.0238545	-0.484707	0.24	0.536	1
CMBL	0.0238545	-0.913467	0.24	0.536	1
SMNDC1	0.023972	0.753859	0.32	0.071	1
RAB11FIP1	0.023974	-0.539164	0.16	0.464	1
BCL2A1	0.0240155	-0.48457	0.6	0.857	1
WTAP	0.0242443	-0.349017	0.12	0.429	1
EHD1	0.0242443	-0.511644	0.12	0.429	1
ATP5PF	0.0246273	-0.459224	0.32	0.643	1
PHKB	0.0246344	-0.42689	0.04	0.286	1
AMZ2	0.0250514	0.652192	0.24	0.036	1
KIF1B	0.0250514	0.628956	0.24	0.036	1
CSNK2A1	0.0250514	0.564382	0.24	0.036	1
KIF2A	0.0250514	0.512484	0.24	0.036	1
CA12	0.0251179	-0.697092	0.12	0.393	1
MYADM	0.0255873	-0.858868	0.2	0.5	1
DECR1	0.0264899	-0.445433	0.32	0.607	1
ACTR2	0.0266677	-0.403498	0.52	0.75	1
SLC3A2	0.0267913	0.609617	0.48	0.179	1
NR4A2	0.0269165	1.01928	0.6	0.464	1
MTND4P12	0.0270823	1.06227	0.24	0.036	1
TRPS1	0.0270823	0.836212	0.24	0.036	1
RAB11FIP2	0.0270823	0.74344	0.24	0.036	1
GADD45G	0.0270823	0.640756	0.24	0.036	1
BAG1	0.0270823	0.59693	0.24	0.036	1
BANF1	0.0270823	0.387394	0.24	0.036	1
TGFB1	0.0274275	0.311423	0.32	0.071	1
VCAN	0.0274289	-1.33787	0.32	0.536	1
PYCARD	0.0275021	-0.576742	0.16	0.429	1
CXCL14	0.0275831	-0.92151	0.4	0.714	1
RPS26	0.0277128	0.61636	0.76	0.607	1
HIF1A	0.0278311	-0.635566	0.32	0.607	1
NCL	0.027857	0.730511	0.72	0.607	1
ALDH6A1	0.0278819	-0.599351	0.24	0.536	1
RBBP6	0.0285235	0.781083	0.6	0.357	1
LDHB	0.028537	-0.893211	0.36	0.607	1
ENOSF1	0.0286542	-0.452494	0.04	0.25	1
CHDH	0.0286542	-0.466923	0.04	0.25	1
GDI1	0.0286542	-0.468729	0.04	0.25	1
TMEM126A	0.0286542	-0.525677	0.04	0.25	1
HCFC1	0.0286542	-0.575805	0.04	0.25	1
AKR1C1	0.0286542	-0.771497	0.04	0.25	1
HDLBP	0.0287555	-0.618441	0.08	0.321	1
CYCS	0.0291337	0.613519	0.64	0.393	1
INHBA	0.0292536	0.970038	0.24	0.036	1
TTC19	0.0292536	0.662143	0.24	0.036	1
ZBTB21	0.0292536	0.494577	0.24	0.036	1
CREB5	0.0293108	0.582204	0.32	0.071	1
TOR1AIP1	0.0293952	-0.321205	0	0.179	1
ACTR10	0.0293952	-0.362929	0	0.179	1
HMGCL	0.0293952	-0.362952	0	0.179	1
NADK	0.0293952	-0.363311	0	0.179	1
TBXAS1	0.0293952	-0.381723	0	0.179	1
FES	0.0293952	-0.386926	0	0.179	1
GNL3L	0.0293952	-0.387063	0	0.179	1
TSTD1	0.0293952	-0.388475	0	0.179	1
FAM214B	0.0293952	-0.391602	0	0.179	1
ELP4	0.0293952	-0.396228	0	0.179	1
MAP7D1	0.0293952	-0.411533	0	0.179	1
BCL6	0.0293952	-0.420625	0	0.179	1
MPZL1	0.0293952	-0.424734	0	0.179	1
KIF1C	0.0293952	-0.426502	0	0.179	1
PAPPA	0.0293952	-0.43368	0	0.179	1
TXLNGY	0.0293952	-0.435039	0	0.179	1
ZBTB11	0.0293952	-0.446046	0	0.179	1
SCYL2	0.0293952	-0.455661	0	0.179	1
TFDP2	0.0293952	-0.456953	0	0.179	1
WIPI1	0.0293952	-0.4578	0	0.179	1
UBE4A	0.0293952	-0.468254	0	0.179	1
CD300C	0.0293952	-0.469712	0	0.179	1
WDR61	0.0293952	-0.475846	0	0.179	1
GAMT	0.0293952	-0.494234	0	0.179	1
AP1M2	0.0293952	-0.501507	0	0.179	1
DZIP1	0.0293952	-0.5026	0	0.179	1
MYO1G	0.0293952	-0.516043	0	0.179	1
EPHX1	0.0293952	-0.525579	0	0.179	1
C1orf122	0.0293952	-0.546866	0	0.179	1
ACOT7	0.0293952	-0.578389	0	0.179	1
SCD	0.0293952	-0.591461	0	0.179	1
ZC3H12A	0.0293952	-0.599493	0	0.179	1
ZNF385A	0.0293952	-0.632372	0	0.179	1
FTLP3	0.0296478	-0.485163	0.16	0.393	1
MCOLN1	0.0296478	-0.664178	0.16	0.393	1
SQSTM1	0.0301576	-0.59035	0.56	0.821	1
UBA52	0.0302375	-0.323676	0.6	0.857	1
MSN	0.0303126	-0.473949	0.4	0.714	1
GCHFR	0.0306423	-0.669502	0.08	0.321	1
MDH1	0.0306423	-0.675458	0.08	0.321	1
HLA-DRB6	0.0306473	0.672264	0.68	0.607	1
FOXO3	0.0307379	-0.704448	0.16	0.429	1
SEC11A	0.0308031	-0.529194	0.04	0.25	1
GGH	0.0308031	-0.58148	0.04	0.25	1
CARD19	0.0308548	-0.485467	0.12	0.357	1
FUT11	0.0308589	0.777016	0.16	0	1
GIMAP1	0.0308589	0.752976	0.16	0	1
AL365357.1	0.0308589	0.721178	0.16	0	1
H2AFX	0.0308589	0.677919	0.16	0	1
HOMER1	0.0308589	0.612088	0.16	0	1
COQ6	0.0308589	0.582753	0.16	0	1
FMO1	0.0308589	0.571597	0.16	0	1
HSPE1P2	0.0308589	0.570925	0.16	0	1
EMC10	0.0308589	0.550704	0.16	0	1
HGS	0.0308589	0.54988	0.16	0	1
ADRB2	0.0308589	0.541919	0.16	0	1
ULBP1	0.0308589	0.540926	0.16	0	1
CERS6	0.0308589	0.536918	0.16	0	1
ELF3	0.0308589	0.493283	0.16	0	1
DCDC2	0.0308589	0.486678	0.16	0	1
SLC35A4	0.0308589	0.478633	0.16	0	1
IFI27	0.0308589	0.466319	0.16	0	1
MRPL16	0.0308589	0.453591	0.16	0	1
FABP5P7	0.0308589	0.444331	0.16	0	1
CD109	0.0308589	0.441462	0.16	0	1
EGOT	0.0308589	0.439672	0.16	0	1
TMEM9	0.0308589	0.437341	0.16	0	1
TCOF1	0.0308589	0.410144	0.16	0	1
ARHGEF1	0.0308589	0.381384	0.16	0	1
APPL2	0.0308589	0.37122	0.16	0	1
UTP18	0.0308589	0.368122	0.16	0	1
TMX2	0.0308589	0.365517	0.16	0	1
AC020911.2	0.0308589	0.357084	0.16	0	1
TMEM248	0.0308589	0.346427	0.16	0	1
CCDC43	0.0308589	0.345753	0.16	0	1
KMT2E-AS1	0.0308589	0.327386	0.16	0	1
CMC2	0.0308589	0.286362	0.16	0	1
WWOX	0.0308589	0.276705	0.16	0	1
PIBF1	0.0308589	0.275677	0.16	0	1
GAS2L3	0.0308589	0.274972	0.16	0	1
TMEM109	0.0308589	0.255476	0.16	0	1
TPST2	0.0308589	0.253781	0.16	0	1
NDUFB1	0.0310733	-0.480298	0.28	0.571	1
MAFG	0.0315732	0.989088	0.24	0.036	1
TSC22D1	0.0315732	0.977089	0.24	0.036	1
CYTOR	0.0315732	0.836868	0.24	0.036	1
SLC12A1	0.0315732	0.651609	0.24	0.036	1
CSK	0.0315732	0.581422	0.24	0.036	1
PLK2	0.0315732	0.576975	0.24	0.036	1
DHX38	0.0315732	0.532416	0.24	0.036	1
FCN1	0.0317623	-0.643737	0.4	0.714	1
RAC1	0.0319546	-0.448996	0.64	0.857	1
RPS15A	0.0320865	-0.366988	0.44	0.75	1
PRELID1	0.0321111	-0.419874	0.2	0.464	1
PTGER2	0.0326345	-0.644755	0.08	0.321	1
ACO1	0.0327328	-0.681296	0.12	0.357	1
MSMO1	0.0330889	-0.505128	0.04	0.25	1
SLC7A5	0.0330889	-0.58039	0.04	0.25	1
SLC4A4	0.0336088	-0.625461	0.12	0.393	1
QSER1	0.0340487	0.543988	0.24	0.036	1
CSRNP1	0.0340487	0.540165	0.24	0.036	1
GRPEL1	0.0340487	0.404507	0.24	0.036	1
SMIM12	0.0340487	0.391572	0.24	0.036	1
MRPS5	0.0341541	-0.337616	0.24	0.536	1
MIOX	0.0342535	-0.565975	0.24	0.5	1
ARPC5	0.0344066	-0.488432	0.36	0.643	1
TCEAL4	0.0347079	-0.555716	0.12	0.357	1
LILRB4	0.0355183	-0.541798	0.04	0.25	1
ZNF281	0.0356425	0.728943	0.32	0.071	1
CANX	0.035752	-0.483998	0.36	0.679	1
MIR3945HG	0.0360562	-0.417427	0.12	0.429	1
IFI35	0.0366883	0.549623	0.24	0.036	1
TAP2	0.0366883	0.511151	0.24	0.036	1
MVB12A	0.0366883	0.495207	0.24	0.036	1
DYNLT1	0.0367839	-0.522483	0.12	0.357	1
RPS3	0.0368158	0.396486	0.84	0.714	1
RPLP1	0.0370984	0.401441	0.96	0.964	1
YME1L1	0.0375546	0.540439	0.48	0.214	1
CCNC	0.0379973	-0.538208	0.08	0.286	1
NAGK	0.0381988	-0.293411	0.16	0.429	1
RPL10	0.0386137	0.304809	0.96	0.821	1
NR4A3	0.0386575	0.643803	0.52	0.286	1
CAPG	0.0391447	-0.613469	0.16	0.393	1
PGD	0.0392894	-0.37244	0.08	0.321	1
S100A12	0.0392894	-0.802523	0.08	0.321	1
MYDGF	0.0397415	0.722642	0.28	0.071	1
CNOT1	0.0397415	0.423557	0.28	0.071	1
ELL2	0.0397995	0.739859	0.4	0.143	1
TUBA1C	0.0397995	0.571117	0.4	0.143	1
PLSCR1	0.0400443	0.626505	0.44	0.214	1
UBE2B	0.0402882	-0.436482	0.16	0.429	1
CTSB	0.0403205	-0.362431	0.8	0.964	1
SLC13A3	0.0404832	-0.569952	0.08	0.286	1
MPEG1	0.0412543	-0.463412	0.12	0.357	1
LYN	0.0414111	-0.572003	0.36	0.643	1
PLK3	0.0417496	-0.454664	0.08	0.321	1
KLF2	0.0417496	-0.765199	0.08	0.321	1
PSMC6	0.0424391	0.766951	0.28	0.071	1
M6PR	0.0424738	0.466088	0.44	0.179	1
SNN	0.0431056	-0.714124	0.08	0.286	1
ZCRB1	0.0431056	-0.773596	0.08	0.286	1
SLC22A6	0.0431056	-0.912151	0.08	0.286	1
LUC7L3	0.043188	-0.30212	0.24	0.571	1
ADA2	0.0436569	-0.298284	0.12	0.357	1
CELF2	0.0436569	-0.43291	0.12	0.357	1
PER1	0.0437387	-0.362896	0.04	0.25	1
TANK	0.043747	-0.469917	0.28	0.607	1
ANXA5	0.0439937	0.495527	0.8	0.679	1
PDCD4	0.0443391	0.617099	0.32	0.107	1
RPS4Y1	0.0443391	-0.455192	0.08	0.321	1
ADGRE5	0.0444004	-0.54288	0.2	0.429	1
NASP	0.0444435	0.557061	0.4	0.143	1
CTSS	0.0447789	-0.391886	0.8	0.929	1
ARID5B	0.04529	0.691844	0.28	0.071	1
LRP2	0.0455499	-0.353704	0.16	0.464	1
MT1X	0.0456509	-0.79173	0.28	0.571	1
HBEGF	0.0460179	0.623445	0.48	0.214	1
TWISTNB	0.0461143	1.21675	0.52	0.25	1
HMGN2	0.0461143	0.595653	0.52	0.25	1
MT-ND3	0.0463407	0.319682	1	1	1
NCOR2	0.0468136	-0.314121	0.04	0.25	1
SLC17A5	0.0468136	-0.47033	0.04	0.25	1
MCL1	0.0468769	-0.314879	0.32	0.607	1
METTL7A	0.0469319	-0.520117	0.12	0.393	1
SPECC1	0.0470627	0.676602	0.32	0.107	1
RCSD1	0.0470627	-0.394402	0.08	0.321	1
ATP5MC1	0.0475599	-0.517027	0.12	0.321	1
RBM3	0.0476968	-0.393483	0.36	0.75	1
CCNI	0.0478836	-0.529573	0.48	0.679	1
TUBA1A	0.0480381	-0.3115	0.24	0.536	1
NOP56	0.0483007	0.25499	0.28	0.071	1
PTMAP2	0.0483686	0.524072	0.48	0.214	1
SF3B2	0.0483686	-0.428148	0.2	0.464	1
HIST1H1C	0.0487826	-0.549909	0.08	0.286	1
ATP5F1E	0.0488821	-0.26745	0.84	0.964	1
SUCLG1	0.0498245	-0.72309	0.4	0.714	1
ANPEP	0.0511092	-0.486726	0.16	0.393	1
NCOA4	0.0512501	-0.555811	0.32	0.536	1
RPL39	0.0514709	-0.392236	0.56	0.929	1
MTCH1	0.0518487	-0.413413	0.08	0.286	1
MRPL34	0.0518487	-0.441774	0.08	0.286	1
HSPH1	0.0520778	-0.477096	0.88	0.964	1
NSA2	0.052112	-0.427314	0.28	0.536	1
RPL3	0.0521589	0.28952	0.8	0.786	1
IL6R	0.0522615	-0.493716	0.12	0.393	1
DAB2	0.0525532	-0.548638	0.32	0.571	1
GOLGA4	0.0532385	-0.655021	0.24	0.5	1
ZNF331	0.0534458	0.851108	0.48	0.25	1
MAT2B	0.0539914	0.60145	0.2	0.036	1
TNPO1	0.0539914	0.346073	0.2	0.036	1
RMC1	0.0541676	-0.283894	0	0.143	1
ASL	0.0541676	-0.285332	0	0.143	1
MTX2	0.0541676	-0.286639	0	0.143	1
SYNE1	0.0541676	-0.287559	0	0.143	1
PANK3	0.0541676	-0.287781	0	0.143	1
C1orf115	0.0541676	-0.288639	0	0.143	1
UPB1	0.0541676	-0.292377	0	0.143	1
SMPDL3A	0.0541676	-0.293795	0	0.143	1
C5orf51	0.0541676	-0.294093	0	0.143	1
AC090498.1	0.0541676	-0.297632	0	0.143	1
DHRS7B	0.0541676	-0.298296	0	0.143	1
EHMT1	0.0541676	-0.299261	0	0.143	1
DCTN5	0.0541676	-0.301682	0	0.143	1
ALDH1B1	0.0541676	-0.302317	0	0.143	1
TRAPPC6B	0.0541676	-0.30335	0	0.143	1
GPATCH8	0.0541676	-0.303856	0	0.143	1
IRF5	0.0541676	-0.307983	0	0.143	1
AIF1L	0.0541676	-0.308756	0	0.143	1
PDLIM2	0.0541676	-0.309036	0	0.143	1
CCDC71L	0.0541676	-0.312379	0	0.143	1
PXN	0.0541676	-0.31385	0	0.143	1
ATP2B4	0.0541676	-0.318747	0	0.143	1
RABIF	0.0541676	-0.319001	0	0.143	1
ITGAE	0.0541676	-0.319526	0	0.143	1
SMIM27	0.0541676	-0.320286	0	0.143	1
TMEM14A	0.0541676	-0.322519	0	0.143	1
SLF2	0.0541676	-0.324637	0	0.143	1
GIMAP4	0.0541676	-0.324771	0	0.143	1
UBA5	0.0541676	-0.326787	0	0.143	1
PRPF3	0.0541676	-0.329108	0	0.143	1
AKT1	0.0541676	-0.330034	0	0.143	1
TLE3	0.0541676	-0.331315	0	0.143	1
CENPB	0.0541676	-0.334459	0	0.143	1
SRPK2	0.0541676	-0.336325	0	0.143	1
ARMT1	0.0541676	-0.338766	0	0.143	1
IFT27	0.0541676	-0.340699	0	0.143	1
R3HDM4	0.0541676	-0.34092	0	0.143	1
CDH6	0.0541676	-0.342756	0	0.143	1
MLX	0.0541676	-0.342843	0	0.143	1
ITGA5	0.0541676	-0.350542	0	0.143	1
ZBTB4	0.0541676	-0.355166	0	0.143	1
DCN	0.0541676	-0.355709	0	0.143	1
ST3GAL2	0.0541676	-0.355974	0	0.143	1
TAF13	0.0541676	-0.359271	0	0.143	1
PFDN4	0.0541676	-0.359589	0	0.143	1
ZNF611	0.0541676	-0.362007	0	0.143	1
FAM199X	0.0541676	-0.364192	0	0.143	1
CD47	0.0541676	-0.365665	0	0.143	1
PRMT1	0.0541676	-0.377187	0	0.143	1
DDX19B	0.0541676	-0.378837	0	0.143	1
DNAJC13	0.0541676	-0.379711	0	0.143	1
TMEM91	0.0541676	-0.380465	0	0.143	1
HMGCR	0.0541676	-0.380914	0	0.143	1
SLC47A2	0.0541676	-0.381473	0	0.143	1
HTT	0.0541676	-0.383162	0	0.143	1
NUDT3	0.0541676	-0.391375	0	0.143	1
SLC35F6	0.0541676	-0.392906	0	0.143	1
TRIM56	0.0541676	-0.399805	0	0.143	1
GPR137B	0.0541676	-0.406555	0	0.143	1
TRIM28	0.0541676	-0.414223	0	0.143	1
SLC44A2	0.0541676	-0.417067	0	0.143	1
AKNA	0.0541676	-0.419855	0	0.143	1
GPX2	0.0541676	-0.427929	0	0.143	1
FUOM	0.0541676	-0.432248	0	0.143	1
UBE2N	0.0541676	-0.439592	0	0.143	1
TMC6	0.0541676	-0.465506	0	0.143	1
S1PR4	0.0541676	-0.468472	0	0.143	1
UBE2L6	0.0541676	-0.488656	0	0.143	1
ZNF394	0.0541676	-0.597005	0	0.143	1
METRNL	0.0543184	-0.423978	0.2	0.429	1
CFL1	0.0543642	-0.287733	0.68	0.893	1
SNRPD3	0.0544813	-0.313556	0.12	0.357	1
PSMA1	0.0545197	-0.387394	0.04	0.214	1
HINT2	0.0545197	-0.411973	0.04	0.214	1
DENND5A	0.0545197	-0.415816	0.04	0.214	1
WDR45	0.0545197	-0.420486	0.04	0.214	1
AP5M1	0.0545197	-0.428223	0.04	0.214	1
LSM4	0.0545197	-0.432607	0.04	0.214	1
SULT1C2	0.0545197	-0.491978	0.04	0.214	1
TMEM30A	0.0545197	-0.493337	0.04	0.214	1
DMXL1	0.0545197	-0.50005	0.04	0.214	1
CAPN2	0.0545197	-0.526015	0.04	0.214	1
ADAP2	0.0545197	-0.529943	0.04	0.214	1
CCDC69	0.0545197	-0.548111	0.04	0.214	1
MCCD1	0.0545197	-0.554447	0.04	0.214	1
DLST	0.0545197	-0.573468	0.04	0.214	1
SNAP29	0.0545197	-0.585237	0.04	0.214	1
MIR155HG	0.0545197	-0.615875	0.04	0.214	1
TNF	0.0545197	-0.630082	0.04	0.214	1
LACTB2	0.0545197	-0.776749	0.04	0.214	1
MT-ND5	0.0549593	0.33842	1	1	1
MT-CYB	0.0549593	0.29139	1	1	1
AL450405.1	0.0549615	-0.332035	0.16	0.429	1
SELENOS	0.0550744	-0.496118	0.08	0.286	1
COPA	0.0550744	-0.575104	0.08	0.286	1
BAZ2B	0.0551105	0.406994	0.4	0.143	1
H1FX	0.0563461	-0.486341	0.12	0.321	1
STX11	0.0566864	-0.46871	0.16	0.393	1
EEA1	0.0566864	-0.501573	0.16	0.393	1
CEP350	0.0571232	-0.373527	0.28	0.536	1
B2M	0.0573076	0.338945	0.96	1	1
CLEC7A	0.0575125	0.579278	0.36	0.143	1
PLIN3	0.0575125	-0.397422	0.12	0.357	1
MS4A6A	0.0579156	-0.475488	0.24	0.536	1
CD14	0.0580664	0.538628	0.68	0.5	1
P2RX7	0.058156	0.544736	0.2	0.036	1
SRRT	0.058156	0.455609	0.2	0.036	1
TPGS2	0.058156	0.300883	0.2	0.036	1
S100A11	0.058267	-0.377597	0.64	0.857	1
SUCO	0.0584369	-0.329923	0.04	0.214	1
HAT1	0.0584369	-0.3704	0.04	0.214	1
UBALD2	0.0584369	-0.384576	0.04	0.214	1
MX1	0.0584369	-0.469388	0.04	0.214	1
ACMSD	0.0584369	-0.505917	0.04	0.214	1
NDUFB11	0.0587168	-0.305373	0.32	0.536	1
SRSF11	0.059026	-0.408444	0.48	0.786	1
FAHD1	0.0595596	-0.612619	0.12	0.321	1
PLTP	0.0595596	-0.804801	0.12	0.321	1
PSMD7	0.0596596	-0.433552	0.16	0.393	1
HSPB1	0.0598756	-0.507469	0.72	0.821	1
SLC11A1	0.0599327	0.341235	0.44	0.214	1
TRIM38	0.060192	-0.251552	0.2	0.5	1
CACYBP	0.0604757	-0.589434	0.52	0.714	1
ILF3-AS1	0.0606827	0.475195	0.36	0.143	1
ZNF706	0.0616857	-0.668764	0.24	0.429	1
NRIP1	0.0616857	-0.670583	0.24	0.429	1
PDAP1	0.0620287	-0.34195	0.08	0.286	1
NDUFS5	0.0620308	0.880142	0.52	0.286	1
VDR	0.062584	0.583657	0.2	0.036	1
MRPS30	0.062584	0.53904	0.2	0.036	1
ETV3	0.062584	0.537822	0.2	0.036	1
TMEM127	0.062584	0.417139	0.2	0.036	1
TMPO	0.0625851	-0.637974	0.04	0.214	1
HSPE1	0.0625932	0.572707	0.96	0.929	1
HSPA5	0.0627125	-0.354905	0.36	0.714	1
FAM177A1	0.0629239	-0.592886	0.12	0.321	1
PLBD1	0.0638279	-0.701702	0.2	0.393	1
ICAM1	0.0641463	-0.429448	0.24	0.5	1
NINJ1	0.0643371	-0.269437	0.48	0.75	1
RANBP2	0.0644443	0.930562	0.36	0.179	1
IGFBP5	0.0648706	0.913833	0.12	0	1
GBP5	0.0648706	0.885451	0.12	0	1
CKAP2	0.0648706	0.672906	0.12	0	1
PHTF2	0.0648706	0.650666	0.12	0	1
TRMT10A	0.0648706	0.63234	0.12	0	1
ZNHIT6	0.0648706	0.619225	0.12	0	1
AKAP11	0.0648706	0.618416	0.12	0	1
RGS12	0.0648706	0.579463	0.12	0	1
PRPF19	0.0648706	0.563932	0.12	0	1
ERG28	0.0648706	0.550467	0.12	0	1
PARN	0.0648706	0.534973	0.12	0	1
CHCHD7	0.0648706	0.507628	0.12	0	1
JPT2	0.0648706	0.505227	0.12	0	1
SRGAP2C	0.0648706	0.503612	0.12	0	1
TRAF3	0.0648706	0.496259	0.12	0	1
RCC2	0.0648706	0.488291	0.12	0	1
FABP3	0.0648706	0.482116	0.12	0	1
GSN	0.0648706	0.473111	0.12	0	1
ZNF264	0.0648706	0.470601	0.12	0	1
IL16	0.0648706	0.470148	0.12	0	1
SUCNR1	0.0648706	0.466667	0.12	0	1
MOAP1	0.0648706	0.460726	0.12	0	1
MIR1244-2	0.0648706	0.456369	0.12	0	1
VPS37A	0.0648706	0.436084	0.12	0	1
C21orf59	0.0648706	0.423684	0.12	0	1
SCD5	0.0648706	0.423474	0.12	0	1
ZBED3	0.0648706	0.422112	0.12	0	1
RPARP-AS1	0.0648706	0.420056	0.12	0	1
DCAF5	0.0648706	0.419298	0.12	0	1
DYNC2H1	0.0648706	0.414061	0.12	0	1
RPS6KB2	0.0648706	0.413021	0.12	0	1
TPGS1	0.0648706	0.410791	0.12	0	1
PMS1	0.0648706	0.40503	0.12	0	1
KDM4B	0.0648706	0.392523	0.12	0	1
BLNK	0.0648706	0.387231	0.12	0	1
FHL1	0.0648706	0.385661	0.12	0	1
FILIP1L	0.0648706	0.381846	0.12	0	1
VPS8	0.0648706	0.371786	0.12	0	1
TRMT1L	0.0648706	0.353384	0.12	0	1
NTN4	0.0648706	0.348831	0.12	0	1
CCS	0.0648706	0.348104	0.12	0	1
PAN3	0.0648706	0.346909	0.12	0	1
TOGARAM1	0.0648706	0.341023	0.12	0	1
FGFRL1	0.0648706	0.335015	0.12	0	1
LATS1	0.0648706	0.334265	0.12	0	1
ATXN10	0.0648706	0.334122	0.12	0	1
OTUD3	0.0648706	0.330476	0.12	0	1
MIR4435-2HG	0.0648706	0.330095	0.12	0	1
DDX54	0.0648706	0.322567	0.12	0	1
EMX1	0.0648706	0.319459	0.12	0	1
COMMD5	0.0648706	0.319167	0.12	0	1
TTF2	0.0648706	0.318873	0.12	0	1
BZW2	0.0648706	0.318459	0.12	0	1
NREP	0.0648706	0.318283	0.12	0	1
FXYD4	0.0648706	0.314933	0.12	0	1
RFLNB	0.0648706	0.314016	0.12	0	1
GNA12	0.0648706	0.312404	0.12	0	1
CEP128	0.0648706	0.307585	0.12	0	1
ZDHHC2	0.0648706	0.304392	0.12	0	1
RCN1	0.0648706	0.303426	0.12	0	1
ZNF124	0.0648706	0.302708	0.12	0	1
SRP68	0.0648706	0.299367	0.12	0	1
RFC3	0.0648706	0.293315	0.12	0	1
STRBP	0.0648706	0.293255	0.12	0	1
HOXA5	0.0648706	0.283569	0.12	0	1
C20orf194	0.0648706	0.279987	0.12	0	1
TLK1	0.0648706	0.277589	0.12	0	1
SLC25A25	0.0648706	0.273874	0.12	0	1
CDKAL1	0.0648706	0.271762	0.12	0	1
CEP162	0.0648706	0.270383	0.12	0	1
RCE1	0.0648706	0.270367	0.12	0	1
CTH	0.0648706	0.268052	0.12	0	1
HAUS2	0.0648706	0.266654	0.12	0	1
PNKP	0.0648706	0.258831	0.12	0	1
RCOR1	0.0648706	0.252062	0.12	0	1
MANF	0.0648706	0.251329	0.12	0	1
PPP1R15A	0.0649543	-0.7508	0.36	0.607	1
RSL1D1	0.0653734	1.00017	0.6	0.357	1
CKAP4	0.0657695	-0.642075	0.08	0.286	1
A2M	0.0659849	0.375152	0.28	0.071	1
IDH2	0.0659946	-0.291819	0.16	0.393	1
MIA3	0.0659946	-0.344041	0.16	0.393	1
BTG2	0.0664436	-0.416369	0.12	0.321	1
AIMP1	0.0664436	-0.529483	0.12	0.321	1
SLC16A6	0.0669739	-0.393239	0.04	0.214	1
SIRPB1	0.0669739	-0.554258	0.04	0.214	1
CDC42BPA	0.0669739	-0.564572	0.04	0.214	1
PTGER4	0.0672872	0.369799	0.2	0.036	1
BBOX1	0.067458	-0.477404	0.12	0.357	1
ACTG1	0.067497	-0.409599	0.76	0.964	1
NR4A1	0.0678317	-0.799543	0.16	0.357	1
FYB1	0.0689137	-0.307321	0.6	0.929	1
PDCD6IP	0.0692498	-0.330564	0.2	0.429	1
MYO6	0.0696943	-0.298894	0.08	0.286	1
PTX3	0.070124	-0.719372	0.12	0.321	1
RALBP1	0.0702567	-0.706413	0.24	0.5	1
NBN	0.0708089	-0.543876	0.24	0.464	1
ALAS1	0.0713642	-0.418664	0.16	0.357	1
THRAP3	0.0713642	-0.622569	0.16	0.357	1
GALM	0.0713642	-0.645944	0.16	0.357	1
SSR4	0.0714248	0.447652	0.56	0.286	1
TMEM230	0.071613	-0.428938	0.04	0.214	1
RNF114	0.071613	-0.494561	0.04	0.214	1
C6orf106	0.0722293	-0.600821	0.08	0.25	1
GAPT	0.0722776	0.600674	0.2	0.036	1
SLC4A7	0.0722776	0.462856	0.2	0.036	1
BBIP1	0.0722776	0.408055	0.2	0.036	1
SMIM14	0.0722776	0.397468	0.2	0.036	1
CTDSP1	0.0722776	0.299062	0.2	0.036	1
EMD	0.0722776	0.291201	0.2	0.036	1
HSBP1	0.072791	0.567063	0.64	0.5	1
EPRS	0.0728739	-0.465851	0.16	0.393	1
GBP2	0.0734865	-0.380211	0.24	0.5	1
PAH	0.0738094	-0.286421	0.08	0.286	1
ECI1	0.0738157	0.501122	0.24	0.071	1
RAB8A	0.0738157	0.499676	0.24	0.071	1
FAM210A	0.0738157	0.416576	0.24	0.071	1
NUDC	0.07397	-0.465274	0.12	0.321	1
PCBD1	0.0741099	-0.547536	0.24	0.464	1
PSMB6	0.0741996	-0.540955	0.28	0.5	1
NABP1	0.0743184	0.384	0.32	0.107	1
DYNLRB1	0.0744084	-0.267383	0.2	0.464	1
PECAM1	0.0744084	-0.373571	0.2	0.464	1
SMCHD1	0.0746337	0.440119	0.56	0.357	1
ARRB2	0.0748438	-0.268371	0.12	0.357	1
THBD	0.0758069	-0.34218	0.2	0.5	1
SCP2	0.0760986	-0.466991	0.2	0.429	1
CNN3	0.0765122	-0.300104	0.04	0.214	1
NAA15	0.0765122	-0.301153	0.04	0.214	1
MRPL27	0.0765122	-0.365491	0.04	0.214	1
HIGD1A	0.0765122	-0.379728	0.04	0.214	1
RDX	0.0765275	-0.464028	0.16	0.393	1
PPP2R5E	0.0766551	-0.477188	0.08	0.25	1
CBR1	0.0779038	-0.594899	0.24	0.429	1
IFI30	0.0779129	-0.517923	0.28	0.536	1
S100A6	0.0779257	-0.422095	0.76	0.821	1
EIF6	0.0779868	-0.541401	0.12	0.321	1
ALDH1A1	0.0779868	-0.699141	0.12	0.321	1
CYP1B1	0.078121	-0.32735	0.08	0.286	1
GPN3	0.078552	0.465014	0.24	0.071	1
CD83	0.0787032	-0.376961	0.48	0.75	1
CAPNS1	0.0788815	-0.752255	0.16	0.357	1
PDLIM5	0.0792962	-0.285048	0.2	0.5	1
TAX1BP1	0.080589	-0.382899	0.52	0.643	1
EIF4G1	0.0812995	-0.422223	0.08	0.25	1
HCK	0.0813325	-0.475907	0.32	0.5	1
THOC2	0.08152	-0.326309	0.4	0.643	1
HERPUD1	0.0815317	0.56679	0.44	0.25	1
FGR	0.0815317	-0.286714	0.2	0.464	1
RAB7A	0.0815317	-0.514853	0.24	0.429	1
MPLKIP	0.0816812	-0.284986	0.04	0.214	1
FRG1HP	0.0816812	-0.305897	0.04	0.214	1
CCDC88A	0.0819228	-0.314064	0.4	0.679	1
ST13	0.0821083	-0.43761	0.52	0.679	1
LITAF	0.0821509	-0.457688	0.64	0.893	1
LYZ	0.0834119	-0.831119	0.8	0.893	1
GABARAPL1	0.0834901	-0.425457	0.2	0.429	1
EIF2AK4	0.0835328	0.73618	0.24	0.071	1
KIAA1143	0.0835328	0.456025	0.24	0.071	1
POLR2K	0.0835328	0.3889	0.24	0.071	1
PPM1G	0.0835328	0.305152	0.24	0.071	1
HNRNPA2B1	0.0842792	-0.33192	0.64	0.821	1
HLA-DQA2	0.0845528	0.578767	0.52	0.286	1
PEBP1	0.086099	-0.704848	0.64	0.75	1
RDH11	0.086553	-0.36806	0.12	0.321	1
BIRC2	0.0873592	-0.353711	0.08	0.286	1
RSL24D1	0.0874064	0.283685	0.32	0.107	1
COX7B	0.0876404	-0.61343	0.28	0.464	1
FOXN3	0.0887663	0.411145	0.24	0.071	1
GPCPD1	0.0887954	-0.484359	0.56	0.643	1
TSPO	0.0889095	-0.56914	0.48	0.643	1
KLF6	0.0892429	-0.71148	0.68	0.786	1
TRIR	0.0911126	-0.340139	0.12	0.321	1
LAMP1	0.0911126	-0.359987	0.12	0.321	1
ARHGDIA	0.0911126	-0.453697	0.12	0.321	1
MTRNR2L12	0.091273	-0.343607	0.08	0.25	1
SLC7A8	0.091273	-0.435306	0.08	0.25	1
YTHDF3	0.0913531	0.648422	0.36	0.179	1
RPL8	0.0922046	0.358374	0.96	0.929	1
CKS2	0.0922984	0.489176	0.28	0.107	1
SLC5A12	0.0933643	-0.452473	0.2	0.393	1
CTSA	0.0941876	-0.35542	0.32	0.536	1
FOXP1	0.0942608	0.376935	0.24	0.071	1
BCCIP	0.0942608	0.273478	0.24	0.071	1
CYB5A	0.09458	-0.317497	0.2	0.5	1
CES2	0.0946157	-0.776973	0.12	0.286	1
MT1E	0.0961395	-0.299334	0.28	0.571	1
RIF1	0.0966165	-0.427902	0.08	0.25	1
MMP24OS	0.0966165	-0.444214	0.08	0.25	1
EAF1	0.0966165	-0.459272	0.08	0.25	1
PPP2R5C	0.0966165	-0.550283	0.08	0.25	1
ARHGAP5	0.097436	0.292353	0.44	0.25	1
EIF4G3	0.0974594	0.600935	0.28	0.107	1
CREM	0.0987486	0.794261	0.44	0.286	1
CHMP1B	0.0996375	0.669831	0.48	0.286	1
TMEM256	0.0996813	-0.421434	0.12	0.286	1
TMEM254	0.0997712	-0.250109	0	0.107	1
ASTE1	0.0997712	-0.250507	0	0.107	1
SF3A2	0.0997712	-0.250977	0	0.107	1
METTL5	0.0997712	-0.252821	0	0.107	1
SPTLC1	0.0997712	-0.253959	0	0.107	1
HIST1H1E	0.0997712	-0.255208	0	0.107	1
ISY1	0.0997712	-0.255247	0	0.107	1
CYP4V2	0.0997712	-0.25568	0	0.107	1
TXNRD2	0.0997712	-0.256322	0	0.107	1
EMX2	0.0997712	-0.256948	0	0.107	1
ESRRA	0.0997712	-0.256974	0	0.107	1
KLHL36	0.0997712	-0.25726	0	0.107	1
MAPK7	0.0997712	-0.258751	0	0.107	1
AL031777.3	0.0997712	-0.258921	0	0.107	1
GFM1	0.0997712	-0.258993	0	0.107	1
MCEMP1	0.0997712	-0.25948	0	0.107	1
PDCD7	0.0997712	-0.260645	0	0.107	1
PFKFB2	0.0997712	-0.261068	0	0.107	1
TMEM56	0.0997712	-0.26158	0	0.107	1
HERC2P2	0.0997712	-0.261615	0	0.107	1
C1GALT1	0.0997712	-0.26175	0	0.107	1
FBXO3	0.0997712	-0.262448	0	0.107	1
EXOC5	0.0997712	-0.262687	0	0.107	1
SLC28A1	0.0997712	-0.262848	0	0.107	1
C19orf44	0.0997712	-0.262892	0	0.107	1
RDH14	0.0997712	-0.264838	0	0.107	1
SIAH1	0.0997712	-0.264853	0	0.107	1
CRYZL1	0.0997712	-0.265722	0	0.107	1
AL034397.3	0.0997712	-0.26587	0	0.107	1
NET1	0.0997712	-0.267977	0	0.107	1
FBXO8	0.0997712	-0.268273	0	0.107	1
AL136126.1	0.0997712	-0.268434	0	0.107	1
KLHDC2	0.0997712	-0.268631	0	0.107	1
HTATIP2	0.0997712	-0.269015	0	0.107	1
IL18BP	0.0997712	-0.269406	0	0.107	1
DHDDS	0.0997712	-0.269862	0	0.107	1
CRABP1	0.0997712	-0.269875	0	0.107	1
LPCAT1	0.0997712	-0.270316	0	0.107	1
ZNF428	0.0997712	-0.270434	0	0.107	1
RBKS	0.0997712	-0.270909	0	0.107	1
C10orf76	0.0997712	-0.270974	0	0.107	1
HINT3	0.0997712	-0.271069	0	0.107	1
C15orf40	0.0997712	-0.271497	0	0.107	1
ARL11	0.0997712	-0.271828	0	0.107	1
PDK2	0.0997712	-0.274112	0	0.107	1
HMOX2	0.0997712	-0.275895	0	0.107	1
ADPRHL2	0.0997712	-0.276752	0	0.107	1
NACA2	0.0997712	-0.277781	0	0.107	1
ALDH1L1	0.0997712	-0.278095	0	0.107	1
NRCAM	0.0997712	-0.278264	0	0.107	1
C18orf21	0.0997712	-0.279433	0	0.107	1
SULF2	0.0997712	-0.280185	0	0.107	1
NOC2L	0.0997712	-0.280659	0	0.107	1
ARFIP2	0.0997712	-0.282586	0	0.107	1
MCMBP	0.0997712	-0.283267	0	0.107	1
RNF214	0.0997712	-0.283267	0	0.107	1
GABRB3	0.0997712	-0.283687	0	0.107	1
CRISPLD2	0.0997712	-0.284282	0	0.107	1
SUGP1	0.0997712	-0.285086	0	0.107	1
THNSL1	0.0997712	-0.286661	0	0.107	1
FN3K	0.0997712	-0.287209	0	0.107	1
ECD	0.0997712	-0.287964	0	0.107	1
NDUFV2	0.0997712	-0.289795	0	0.107	1
C1orf131	0.0997712	-0.290953	0	0.107	1
UBE4B	0.0997712	-0.293664	0	0.107	1
PAFAH1B2	0.0997712	-0.294689	0	0.107	1
SIGLEC5	0.0997712	-0.29555	0	0.107	1
RASA4	0.0997712	-0.297065	0	0.107	1
ZNF25	0.0997712	-0.297456	0	0.107	1
MAN1C1	0.0997712	-0.298069	0	0.107	1
USP6NL	0.0997712	-0.299413	0	0.107	1
GNPAT	0.0997712	-0.300025	0	0.107	1
DCUN1D3	0.0997712	-0.303175	0	0.107	1
CD180	0.0997712	-0.312375	0	0.107	1
ZNF189	0.0997712	-0.313077	0	0.107	1
CDC42EP4	0.0997712	-0.318641	0	0.107	1
MAEA	0.0997712	-0.321637	0	0.107	1
NUS1	0.0997712	-0.326397	0	0.107	1
GPR84	0.0997712	-0.32694	0	0.107	1
TRIP4	0.0997712	-0.331383	0	0.107	1
TMEM232	0.0997712	-0.331746	0	0.107	1
HPS1	0.0997712	-0.333113	0	0.107	1
SPRYD4	0.0997712	-0.333521	0	0.107	1
ARFGEF2	0.0997712	-0.339308	0	0.107	1
NUDT22	0.0997712	-0.340004	0	0.107	1
TMUB1	0.0997712	-0.341295	0	0.107	1
TTC39B	0.0997712	-0.342766	0	0.107	1
VAV1	0.0997712	-0.349274	0	0.107	1
RNF167	0.0997712	-0.35069	0	0.107	1
THRSP	0.0997712	-0.351942	0	0.107	1
MTMR9	0.0997712	-0.354406	0	0.107	1
RGL2	0.0997712	-0.354894	0	0.107	1
UTP20	0.0997712	-0.355386	0	0.107	1
AGO2	0.0997712	-0.358955	0	0.107	1
HMGXB3	0.0997712	-0.361315	0	0.107	1
CASP5	0.0997712	-0.363459	0	0.107	1
MAP7D2	0.0997712	-0.363511	0	0.107	1
SHMT2	0.0997712	-0.363616	0	0.107	1
LINC00243	0.0997712	-0.365343	0	0.107	1
B3GNT2	0.0997712	-0.383252	0	0.107	1
LILRB5	0.0997712	-0.388185	0	0.107	1
MPI	0.0997712	-0.394324	0	0.107	1
ITGAV	0.0997712	-0.410522	0	0.107	1
PPP2R3A	0.0997712	-0.424139	0	0.107	1
KIF16B	0.0997712	-0.425769	0	0.107	1
TSC22D4	0.0997712	-0.432526	0	0.107	1
HIC1	0.0997712	-0.436708	0	0.107	1
MRPL49	0.0997712	-0.450109	0	0.107	1
ARHGAP4	0.0997712	-0.501258	0	0.107	1
PROK2	0.0997712	-0.974165	0	0.107	1
CYSTM1	0.100014	-0.360741	0.2	0.429	1
UCP2	0.100515	-0.281746	0.16	0.357	1
WASL	0.10081	-0.306064	0.12	0.321	1
SNX10	0.101777	-0.4824	0.24	0.429	1
SLC35F5	0.101957	-0.291715	0.04	0.179	1
GGT6	0.101957	-0.294802	0.04	0.179	1
SLC5A2	0.101957	-0.313216	0.04	0.179	1
2020-09-09	0.101957	-0.314111	0.04	0.179	1
RNPEP	0.101957	-0.321927	0.04	0.179	1
ACO2	0.101957	-0.322462	0.04	0.179	1
KIFAP3	0.101957	-0.330317	0.04	0.179	1
ZDHHC6	0.101957	-0.333475	0.04	0.179	1
HACD3	0.101957	-0.33503	0.04	0.179	1
PGPEP1	0.101957	-0.367805	0.04	0.179	1
COMMD1	0.101957	-0.37722	0.04	0.179	1
SNRNP27	0.101957	-0.38009	0.04	0.179	1
SGTA	0.101957	-0.386936	0.04	0.179	1
ZMPSTE24	0.101957	-0.387074	0.04	0.179	1
NDUFV3	0.101957	-0.40206	0.04	0.179	1
CDA	0.101957	-0.414846	0.04	0.179	1
PRPF38A	0.101957	-0.424152	0.04	0.179	1
PRKCSH	0.101957	-0.444414	0.04	0.179	1
IVD	0.101957	-0.459319	0.04	0.179	1
S100A1	0.101957	-0.479849	0.04	0.179	1
CWC15	0.101957	-0.491089	0.04	0.179	1
PHF21A	0.101957	-0.493258	0.04	0.179	1
SH2D3C	0.101957	-0.536454	0.04	0.179	1
SYNJ2BP	0.101957	-0.537995	0.04	0.179	1
FADS1	0.101957	-0.578969	0.04	0.179	1
OXR1	0.101957	-0.611377	0.04	0.179	1
UQCRQ	0.102008	-0.410337	0.36	0.607	1
GM2A	0.102207	-0.337213	0.08	0.25	1
CR1	0.102207	-0.341114	0.08	0.25	1
GORASP2	0.102207	-0.383071	0.08	0.25	1
PSMD6	0.102207	-0.419797	0.08	0.25	1
ATP6V1A	0.102249	-0.467001	0.2	0.393	1
MS4A7	0.103483	-0.323666	0.52	0.679	1
RHOQ	0.104273	0.637437	0.52	0.357	1
XBP1	0.104378	-0.274647	0.28	0.5	1
ARL8B	0.105363	-0.383019	0.16	0.357	1
NOC3L	0.106066	0.393834	0.24	0.071	1
WDR43	0.106066	0.382544	0.24	0.071	1
CLPTM1L	0.106066	0.341459	0.24	0.071	1
TIPRL	0.106066	0.332528	0.24	0.071	1
RNF168	0.106066	0.321244	0.24	0.071	1
CTSZ	0.106079	-0.509559	0.4	0.571	1
ETS2	0.106938	-0.444465	0.2	0.393	1
SSFA2	0.108053	-0.312739	0.08	0.25	1
TRA2A	0.108053	-0.375354	0.08	0.25	1
HPD	0.108053	-0.403455	0.08	0.25	1
TCN2	0.108053	-0.415655	0.08	0.25	1
LMO4	0.108053	-0.423512	0.08	0.25	1
DPP4	0.108053	-0.479745	0.08	0.25	1
FLOT1	0.108472	0.511967	0.28	0.107	1
KMT2A	0.108472	0.414294	0.28	0.107	1
PIP4K2A	0.108472	0.385198	0.28	0.107	1
NOLC1	0.108472	0.348708	0.28	0.107	1
OSBPL9	0.108922	-0.262	0.04	0.179	1
RP2	0.108922	-0.312271	0.04	0.179	1
FLOT2	0.108922	-0.31981	0.04	0.179	1
RASA3	0.108922	-0.325212	0.04	0.179	1
PMM1	0.108922	-0.356448	0.04	0.179	1
TRAPPC2L	0.108922	-0.366765	0.04	0.179	1
ADA	0.108922	-0.39328	0.04	0.179	1
WWP1	0.108922	-0.396105	0.04	0.179	1
ACAT2	0.108922	-0.433104	0.04	0.179	1
ALPK1	0.108922	-0.440392	0.04	0.179	1
NBPF1	0.108922	-0.464116	0.04	0.179	1
CD44	0.108922	-0.607922	0.36	0.643	1
VEGFA	0.108924	-0.464985	0.2	0.357	1
STAU1	0.108924	-0.478856	0.2	0.357	1
2020-09-07	0.109744	-0.301207	0.44	0.643	1
LPAR6	0.110395	0.4637	0.36	0.179	1
NFKBIZ	0.110459	-0.44153	0.56	0.714	1
VPS29	0.11046	-0.515338	0.12	0.286	1
CEBPZ	0.11092	0.604253	0.44	0.25	1
OCIAD1	0.111236	0.272105	0.36	0.143	1
HLA-DRA	0.11127	0.38666	1	0.964	1
LRRC75A-AS1	0.111421	0.458896	0.4	0.179	1
DCXR	0.112139	-0.626665	0.28	0.429	1
GLG1	0.112394	0.60449	0.24	0.071	1
WIPF2	0.112394	0.342101	0.24	0.071	1
RAP1B	0.11291	-0.441952	0.28	0.464	1
AC245297.1	0.113898	0.722544	0.16	0.036	1
LINC00963	0.113898	0.424913	0.16	0.036	1
SLF1	0.113898	0.400068	0.16	0.036	1
PCNX4	0.113898	0.395913	0.16	0.036	1
DTX3L	0.113898	0.369352	0.16	0.036	1
SMIM20	0.113898	0.333491	0.16	0.036	1
HCFC1R1	0.113898	0.309732	0.16	0.036	1
SLFN11	0.113898	0.292777	0.16	0.036	1
TXNL1	0.113909	-0.407028	0.16	0.321	1
SCAND1	0.113909	-0.522729	0.16	0.321	1
SPARCL1	0.114159	-0.298963	0.08	0.25	1
RSBN1L	0.114159	-0.312631	0.08	0.25	1
SNAP23	0.114159	-0.397643	0.08	0.25	1
CHD9	0.114336	0.507906	0.28	0.107	1
SDAD1	0.114336	0.481086	0.28	0.107	1
MXD1	0.114504	-0.331805	0.24	0.464	1
CCL3	0.115847	-1.29245	0.44	0.607	1
GTPBP4	0.116184	-0.315177	0.12	0.286	1
CACYBPP2	0.116184	-0.418896	0.12	0.286	1
LILRA5	0.116184	-0.441752	0.12	0.286	1
PHYH	0.116184	-0.442778	0.12	0.286	1
PLAC8	0.116184	-0.48464	0.12	0.286	1
PCYOX1	0.116184	-0.490352	0.12	0.286	1
RIPOR1	0.116259	-0.270229	0.04	0.179	1
PSTPIP1	0.116259	-0.321193	0.04	0.179	1
UGDH	0.116259	-0.370093	0.04	0.179	1
GPR155	0.116259	-0.387715	0.04	0.179	1
COBLL1	0.116259	-0.42153	0.04	0.179	1
DPEP1	0.116259	-0.426416	0.04	0.179	1
PLA2G16	0.116259	-0.550174	0.04	0.179	1
RPS29	0.116277	0.372706	0.8	0.893	1
BAZ1B	0.116551	0.250826	0.4	0.179	1
GBP1	0.116824	-0.854406	0.2	0.393	1
GRINA	0.119048	-0.3651	0.2	0.429	1
MAF	0.119352	-0.357916	0.24	0.464	1
LPGAT1	0.119407	-0.437395	0.16	0.321	1
NAMPT	0.120246	-0.287763	0.64	0.75	1
AC020656.1	0.120332	1.00652	0.48	0.321	1
PSMB1	0.120332	-0.359639	0.32	0.464	1
AZI2	0.120447	0.428042	0.28	0.107	1
EP300	0.120535	-0.283854	0.08	0.25	1
C19orf70	0.121026	-0.531037	0.16	0.357	1
TMOD3	0.122029	-0.383733	0.2	0.393	1
CYFIP1	0.122139	-0.486663	0.12	0.286	1
RPS2P5	0.122158	0.721067	0.16	0.036	1
AC025164.1	0.122158	0.539624	0.16	0.036	1
PHYHIPL	0.122158	0.521382	0.16	0.036	1
MBTPS1	0.122158	0.457141	0.16	0.036	1
AC073861.1	0.122158	0.439535	0.16	0.036	1
OFD1	0.122158	0.401694	0.16	0.036	1
DENND1B	0.122158	0.383384	0.16	0.036	1
ZRANB1	0.122158	0.356745	0.16	0.036	1
RLIM	0.122158	0.345199	0.16	0.036	1
AKR1B1	0.122158	0.294439	0.16	0.036	1
RARS2	0.122158	0.294286	0.16	0.036	1
ZNF148	0.122158	0.293858	0.16	0.036	1
CPPED1	0.122662	-0.274455	0.12	0.321	1
ANXA1	0.123217	-0.290388	0.52	0.75	1
RPL23AP2	0.123979	-0.256949	0.04	0.179	1
ISG20	0.123979	-0.262996	0.04	0.179	1
PNPLA2	0.123979	-0.275472	0.04	0.179	1
AP1G1	0.123979	-0.287749	0.04	0.179	1
TINF2	0.123979	-0.304408	0.04	0.179	1
ASGR1	0.123979	-0.343995	0.04	0.179	1
ARG2	0.123979	-0.362684	0.04	0.179	1
FEM1B	0.123979	-0.367696	0.04	0.179	1
SEPHS2	0.124591	-0.636245	0.2	0.357	1
ATP1B1	0.124871	0.300498	0.72	0.464	1
CLIP1	0.126878	0.450439	0.4	0.25	1
UBE2H	0.127185	-0.353566	0.08	0.25	1
EREG	0.127728	-0.338831	0.28	0.5	1
ZBTB43	0.12833	-0.27244	0.12	0.286	1
PAQR5	0.12833	-0.329668	0.12	0.286	1
NUMB	0.12833	-0.486991	0.12	0.286	1
IFNGR2	0.12833	-0.490373	0.12	0.286	1
PDCD10	0.128665	0.68549	0.32	0.143	1
HEIH	0.128665	0.405608	0.32	0.143	1
CLASP2	0.130878	0.605817	0.16	0.036	1
PACS1	0.130878	0.575478	0.16	0.036	1
MPDU1	0.130878	0.559977	0.16	0.036	1
ARMC10	0.130878	0.433373	0.16	0.036	1
ANKRD11	0.130878	0.42208	0.16	0.036	1
ZFHX3	0.130878	0.372486	0.16	0.036	1
CLSTN1	0.130878	0.362367	0.16	0.036	1
HDAC1	0.130878	0.360987	0.16	0.036	1
TRAPPC10	0.130878	0.321314	0.16	0.036	1
MT-TI	0.130878	0.312286	0.16	0.036	1
NCOA3	0.130878	0.290443	0.16	0.036	1
CSRP2	0.130878	0.289141	0.16	0.036	1
NUP107	0.130878	0.28492	0.16	0.036	1
TMEM60	0.130878	0.284469	0.16	0.036	1
MTFR1	0.130878	0.283397	0.16	0.036	1
SUGT1	0.131023	-0.455131	0.16	0.321	1
SRSF2	0.131141	0.396911	0.44	0.25	1
VPS4A	0.132093	-0.263889	0.04	0.179	1
NUDT5	0.132093	-0.276974	0.04	0.179	1
RNF152	0.132093	-0.28816	0.04	0.179	1
ARCN1	0.132093	-0.306127	0.04	0.179	1
PLPP3	0.132093	-0.31161	0.04	0.179	1
PELI2	0.132093	-0.34616	0.04	0.179	1
SF3B1	0.132317	0.524163	0.56	0.393	1
RAB5C	0.13259	-0.32305	0.32	0.5	1
MT-TV	0.132982	0.396562	0.4	0.214	1
NQO2	0.132982	-0.336179	0.2	0.393	1
SDC4	0.133171	-0.365247	0.08	0.214	1
KIAA0232	0.133171	-0.383006	0.08	0.214	1
DNAJC21	0.133171	-0.397735	0.08	0.214	1
VCP	0.133171	-0.448931	0.08	0.214	1
MOCS2	0.133433	0.346699	0.28	0.107	1
PPP1R10	0.133433	0.272228	0.28	0.107	1
CNIH4	0.133929	0.587653	0.2	0.071	1
NPR3	0.133929	0.366354	0.2	0.071	1
NOL8	0.134118	-0.263059	0.08	0.25	1
RARRES3	0.134762	-0.324183	0.12	0.286	1
CGAS	0.134762	-0.326532	0.12	0.286	1
GNL3	0.134895	0.681498	0.32	0.143	1
MEF2D	0.134895	0.594212	0.32	0.143	1
AOAH	0.135976	-0.415402	0.2	0.357	1
DNAJB1	0.136539	-0.40749	0.84	0.929	1
CHCHD2	0.13664	-0.279076	0.52	0.643	1
IFITM3	0.13664	-0.35877	0.44	0.714	1
TMEM176A	0.137151	0.830465	0.32	0.179	1
B4GALT1	0.137151	-0.319826	0.16	0.321	1
SMIM24	0.138135	-0.321597	0.28	0.5	1
TXNRD1	0.138454	-0.297706	0.16	0.357	1
AFF4	0.138737	0.468276	0.4	0.214	1
BHLHE40	0.138737	-0.501549	0.2	0.393	1
RPL36	0.139278	-0.374396	0.68	0.857	1
RSU1	0.140073	0.378062	0.16	0.036	1
ASCC3	0.140073	0.369802	0.16	0.036	1
ZBTB1	0.140073	0.323728	0.16	0.036	1
RUVBL1	0.140073	0.29763	0.16	0.036	1
TOR2A	0.140073	0.283369	0.16	0.036	1
UBE2Q2	0.140073	0.257101	0.16	0.036	1
NGDN	0.140073	0.25134	0.16	0.036	1
NIFK	0.140319	0.422245	0.28	0.107	1
TXNL4A	0.140319	0.331938	0.28	0.107	1
ATP2B1-AS1	0.140365	-0.428836	0.24	0.464	1
SRP54	0.140612	-0.253568	0.04	0.179	1
CARD8-AS1	0.140612	-0.264847	0.04	0.179	1
TRAPPC4	0.140722	-0.316167	0.08	0.214	1
SCRN2	0.140722	-0.349469	0.08	0.214	1
MAPKAPK3	0.140722	-0.358551	0.08	0.214	1
REXO2	0.140722	-0.371696	0.08	0.214	1
GAA	0.140722	-0.535932	0.08	0.214	1
PRDX3	0.140722	-0.598593	0.08	0.214	1
WBP11	0.141354	0.435601	0.32	0.143	1
POLK	0.141354	0.275862	0.32	0.143	1
KLF3	0.141961	-0.62536	0.2	0.357	1
ZC3H13	0.141967	0.538633	0.2	0.071	1
CYTH1	0.141967	0.46868	0.2	0.071	1
CDV3	0.14318	0.589842	0.44	0.286	1
PTGES3	0.143577	-0.437311	0.28	0.5	1
HLA-E	0.144135	0.452257	0.76	0.786	1
NDUFS7	0.144675	-0.265378	0.16	0.357	1
CNDP2	0.144675	-0.269237	0.16	0.357	1
SLC15A3	0.144675	-0.273168	0.16	0.357	1
ATOX1	0.144682	-0.408264	0.2	0.393	1
LILRB3	0.144682	-0.409483	0.2	0.393	1
MAN1A1	0.147476	-0.354529	0.12	0.25	1
PPP4R3B	0.147476	-0.36178	0.12	0.25	1
GPR65	0.148049	0.435604	0.32	0.143	1
DUSP2	0.148049	0.323128	0.32	0.143	1
ANP32A	0.148099	-0.402732	0.24	0.429	1
LEPROT	0.148147	-0.384201	0.2	0.357	1
ENO1	0.148362	-0.287101	0.56	0.821	1
JMJD6	0.14837	-0.313457	0.12	0.286	1
NKAP	0.14837	-0.351546	0.12	0.286	1
RAB29	0.14837	-0.400413	0.12	0.286	1
MARK3	0.148597	-0.349713	0.08	0.214	1
NUDT16	0.148597	-0.361227	0.08	0.214	1
TRIM6	0.148597	-0.38211	0.08	0.214	1
LMNA	0.148597	-0.448112	0.08	0.214	1
SH3YL1	0.148597	-0.693463	0.08	0.214	1
DNAJC15	0.148681	-0.2908	0.28	0.536	1
CD9	0.148856	0.90246	0.24	0.107	1
BRCC3	0.149758	0.263969	0.16	0.036	1
THUMPD3-AS1	0.149758	0.257337	0.16	0.036	1
HCLS1	0.150067	-0.31304	0.16	0.321	1
DUSP5	0.150369	0.451998	0.2	0.071	1
TCEAL8	0.150369	0.36527	0.2	0.071	1
ITGB2	0.150507	-0.416603	0.52	0.714	1
P4HB	0.151107	0.369115	0.36	0.179	1
GOLGB1	0.154364	0.487848	0.52	0.321	1
H3F3AP4	0.154537	-0.362309	0.2	0.357	1
APLP2	0.154792	-0.295858	0.64	0.929	1
RIPOR2	0.155556	-0.40359	0.12	0.286	1
MORF4L2	0.156804	-0.499259	0.08	0.214	1
JMY	0.156864	0.934416	0.32	0.179	1
EML4	0.156864	0.432757	0.32	0.179	1
BDP1	0.15781	0.426885	0.4	0.179	1
ALOX5AP	0.159146	0.65303	0.2	0.071	1
NAA16	0.159146	0.454059	0.2	0.071	1
DDX24	0.16021	0.416269	0.52	0.321	1
ATP5PB	0.160304	-0.679746	0.24	0.429	1
OGDH	0.162623	-0.305326	0.12	0.25	1
AKR1C3	0.162623	-0.715916	0.12	0.25	1
SERPINA1	0.162872	-0.276003	0.56	0.714	1
TIMP1	0.163411	-0.355044	0.68	0.786	1
TGFBI	0.163891	0.787012	0.32	0.179	1
NDUFS1	0.163891	-0.339063	0.16	0.321	1
OAZ2	0.163891	-0.347077	0.16	0.321	1
THBS1	0.1648	0.597543	0.24	0.107	1
RBL2	0.1648	0.512667	0.24	0.107	1
GPD1	0.165351	-0.259803	0.08	0.214	1
GLTP	0.165351	-0.290428	0.08	0.214	1
UROD	0.165351	-0.303481	0.08	0.214	1
CEPT1	0.165351	-0.383644	0.08	0.214	1
NFKBID	0.165351	-0.384118	0.08	0.214	1
ASRGL1	0.165351	-0.398557	0.08	0.214	1
MIDN	0.165351	-0.417578	0.08	0.214	1
CBL	0.165351	-0.422938	0.08	0.214	1
MS4A4A	0.165351	-0.452538	0.08	0.214	1
TRIM24	0.165351	-0.462181	0.08	0.214	1
HADH	0.165351	-0.463752	0.08	0.214	1
MBNL1	0.165573	-0.306599	0.4	0.571	1
CTSH	0.166222	0.427945	0.52	0.321	1
NDUFB9	0.166684	-0.535148	0.28	0.393	1
SNRPB	0.167942	-0.342163	0.2	0.357	1
RIDA	0.167942	-0.390128	0.2	0.357	1
PTPRE	0.167992	0.301914	0.76	0.679	1
ABHD2	0.168305	0.575139	0.2	0.071	1
GOSR1	0.168305	0.436361	0.2	0.071	1
TSPYL2	0.168305	0.431191	0.2	0.071	1
ALOX5	0.168305	0.430994	0.2	0.071	1
CYSLTR1	0.168305	0.391379	0.2	0.071	1
CA2	0.168305	0.391194	0.2	0.071	1
PLD3	0.168305	0.35331	0.2	0.071	1
HUWE1	0.168305	0.351542	0.2	0.071	1
RIOX1	0.168305	0.297399	0.2	0.071	1
MAPK6	0.168813	-0.402488	0.24	0.393	1
PRNP	0.17012	0.449249	0.48	0.321	1
BEST1	0.170623	-0.499118	0.12	0.25	1
MEGF9	0.170623	-0.529925	0.12	0.25	1
STMP1	0.170716	-0.278766	0.12	0.286	1
GLUD1	0.170716	-0.280528	0.12	0.286	1
NBPF14	0.171153	0.423304	0.32	0.179	1
ATP6V0E1	0.172089	-0.319443	0.4	0.679	1
AC116533.1	0.173239	0.613914	0.24	0.107	1
CCDC59	0.173239	0.565105	0.24	0.107	1
UBE2Q1	0.173239	0.564273	0.24	0.107	1
CCDC198	0.174244	-0.277674	0.08	0.214	1
LMAN2	0.174244	-0.292972	0.08	0.214	1
BLVRA	0.174244	-0.319069	0.08	0.214	1
LAMTOR2	0.174244	-0.329715	0.08	0.214	1
TNFAIP8	0.174244	-0.331902	0.08	0.214	1
SUPT20H	0.174244	-0.348948	0.08	0.214	1
ANAPC5	0.174244	-0.365235	0.08	0.214	1
TDP2	0.174244	-0.377532	0.08	0.214	1
NDUFAF3	0.174244	-0.393125	0.08	0.214	1
LY6E	0.177268	0.480732	0.32	0.143	1
ADIRF	0.177854	0.533449	0.2	0.071	1
C4orf48	0.177854	0.527174	0.2	0.071	1
NSL1	0.177854	0.4723	0.2	0.071	1
RPS14	0.178065	0.324522	0.84	0.893	1
CCDC107	0.178699	0.609752	0.28	0.143	1
EPSTI1	0.178699	0.430634	0.28	0.143	1
TIAL1	0.178914	-0.458394	0.12	0.25	1
RNF181	0.178914	-0.538178	0.12	0.25	1
RBM22	0.178914	-0.629767	0.12	0.25	1
TNFSF13B	0.180313	-0.381455	0.28	0.464	1
LPCAT2	0.181996	0.417958	0.24	0.107	1
WDR82	0.181996	0.339661	0.24	0.107	1
2020-09-06	0.181996	0.33152	0.24	0.107	1
SERINC1	0.182523	-0.37571	0.24	0.393	1
SCAF11	0.183067	0.390949	0.56	0.393	1
TPRA1	0.183489	-0.286438	0.08	0.214	1
WAS	0.186395	-0.254516	0.16	0.321	1
RUNX1	0.186957	0.58263	0.28	0.143	1
KMO	0.186957	0.394622	0.28	0.143	1
IQGAP2	0.187275	-0.521027	0.28	0.429	1
SQOR	0.187501	-0.334998	0.12	0.25	1
KCNE3	0.187501	-0.441669	0.12	0.25	1
SLCO4C1	0.187696	-0.251361	0.04	0.143	1
AFM	0.187696	-0.251545	0.04	0.143	1
RER1	0.187696	-0.252827	0.04	0.143	1
ECHDC2	0.187696	-0.253302	0.04	0.143	1
LINC01681	0.187696	-0.262193	0.04	0.143	1
GMFB	0.187696	-0.268534	0.04	0.143	1
ITPRIPL2	0.187696	-0.272667	0.04	0.143	1
NPEPPS	0.187696	-0.27506	0.04	0.143	1
JAK2	0.187696	-0.277674	0.04	0.143	1
XPO7	0.187696	-0.278219	0.04	0.143	1
TNFSF12	0.187696	-0.27869	0.04	0.143	1
IFIT3	0.187696	-0.282744	0.04	0.143	1
KIDINS220	0.187696	-0.283199	0.04	0.143	1
TAF15	0.187696	-0.283582	0.04	0.143	1
SMARCD1	0.187696	-0.285595	0.04	0.143	1
DUSP28	0.187696	-0.287465	0.04	0.143	1
CRLS1	0.187696	-0.291369	0.04	0.143	1
BIN1	0.187696	-0.292071	0.04	0.143	1
SH2B3	0.187696	-0.296135	0.04	0.143	1
CETN3	0.187696	-0.311373	0.04	0.143	1
ANKLE2	0.187696	-0.319166	0.04	0.143	1
ACOT13	0.187696	-0.319436	0.04	0.143	1
COPS7A	0.187696	-0.326057	0.04	0.143	1
COX19	0.187696	-0.328675	0.04	0.143	1
ZNF580	0.187696	-0.330441	0.04	0.143	1
ZNF830	0.187696	-0.333852	0.04	0.143	1
KL	0.187696	-0.335493	0.04	0.143	1
CYP17A1	0.187696	-0.337094	0.04	0.143	1
PPP1R16A	0.187696	-0.337405	0.04	0.143	1
LILRA1	0.187696	-0.341108	0.04	0.143	1
HIST1H2BD	0.187696	-0.347611	0.04	0.143	1
REPIN1	0.187696	-0.349615	0.04	0.143	1
LCMT1	0.187696	-0.352025	0.04	0.143	1
EIF4A1	0.187696	-0.357091	0.04	0.143	1
IQSEC1	0.187696	-0.364232	0.04	0.143	1
MTHFR	0.187696	-0.37063	0.04	0.143	1
TNIP2	0.187696	-0.379102	0.04	0.143	1
DOCK5	0.187696	-0.400863	0.04	0.143	1
IRAK2	0.187696	-0.403181	0.04	0.143	1
STUB1	0.187696	-0.412273	0.04	0.143	1
CTR9	0.187696	-0.417186	0.04	0.143	1
YIPF6	0.187696	-0.417455	0.04	0.143	1
HGD	0.187696	-0.453837	0.04	0.143	1
SLC16A4	0.187696	-0.469198	0.04	0.143	1
UBE2V2	0.187696	-0.481624	0.04	0.143	1
PCK2	0.187696	-0.502883	0.04	0.143	1
TRIM8	0.187696	-0.566274	0.04	0.143	1
SLC34A1	0.187696	-0.621299	0.04	0.143	1
KIAA1109	0.1878	0.405556	0.2	0.071	1
IFI27L2	0.1878	0.399955	0.2	0.071	1
UBE2S	0.1878	0.388474	0.2	0.071	1
UQCRC2	0.1878	0.295577	0.2	0.071	1
GOLPH3	0.1878	0.283802	0.2	0.071	1
MACO1	0.1878	0.273814	0.2	0.071	1
HNRNPDL	0.18926	-0.303733	0.48	0.679	1
CLTA	0.189494	0.371911	0.56	0.393	1
CPVL	0.189758	0.518034	0.48	0.321	1
PHACTR1	0.190601	0.299423	0.64	0.429	1
UBL3	0.191078	0.63119	0.24	0.107	1
DNAJC2	0.191078	0.414613	0.24	0.107	1
MRPL19	0.191078	0.380978	0.24	0.107	1
FAM13B	0.191078	0.314678	0.24	0.107	1
G3BP2	0.193092	-0.272635	0.08	0.214	1
CHORDC1	0.193766	0.602011	0.6	0.429	1
CD81	0.195493	0.631962	0.28	0.143	1
NDUFB6	0.195493	0.319378	0.28	0.143	1
GYG1	0.196389	-0.287524	0.12	0.25	1
PPP1R15B	0.196389	-0.381327	0.12	0.25	1
BNIP3	0.196389	-0.387639	0.12	0.25	1
CARD16	0.196661	-0.293724	0.32	0.464	1
IL1RN	0.197039	-0.53053	0.4	0.607	1
NAF1	0.198151	0.315814	0.2	0.071	1
GPX1	0.199453	0.38898	0.96	0.893	1
MTCO1P40	0.199739	-0.251424	0.04	0.143	1
LYPLA1	0.199739	-0.260192	0.04	0.143	1
SPAG7	0.199739	-0.263715	0.04	0.143	1
ITPRIP	0.199739	-0.268219	0.04	0.143	1
MIOS	0.199739	-0.296544	0.04	0.143	1
GNB4	0.199739	-0.311153	0.04	0.143	1
APOM	0.199739	-0.341273	0.04	0.143	1
MOSPD2	0.199739	-0.607078	0.04	0.143	1
KIF21A	0.200489	0.410926	0.24	0.107	1
OAT	0.200489	0.282606	0.24	0.107	1
ZYX	0.201549	-0.317112	0.28	0.429	1
GUSB	0.201904	0.498217	0.56	0.357	1
HNRNPAB	0.202618	0.439418	0.32	0.179	1
REEP5	0.202618	-0.340404	0.16	0.321	1
RPS2	0.202646	0.254233	0.96	0.929	1
ETFA	0.20306	-0.326726	0.08	0.214	1
CD2AP	0.20306	-0.359292	0.08	0.214	1
MME	0.204312	-0.27203	0.12	0.286	1
SAT1	0.204503	-0.295218	0.96	1	1
RGS10	0.205247	0.332036	0.36	0.214	1
NDUFS6	0.205247	-0.349972	0.2	0.357	1
DPYD	0.205581	-0.316659	0.12	0.25	1
HCST	0.205898	-0.41899	0.32	0.5	1
EDF1	0.207595	-0.256788	0.32	0.536	1
RPS4X	0.208096	0.353528	0.8	0.679	1
HP1BP3	0.208875	0.308901	0.56	0.357	1
TPP1	0.209023	-0.255362	0.24	0.429	1
HSPA6	0.209023	-0.277049	0.24	0.429	1
ASS1	0.209023	-0.30633	0.24	0.429	1
TAGLN2	0.209491	-0.285881	0.48	0.643	1
FAM46A	0.210234	0.436159	0.24	0.107	1
ELOA	0.210234	0.432042	0.24	0.107	1
NANS	0.210234	0.396602	0.24	0.107	1
PRKDC	0.210234	0.340387	0.24	0.107	1
CTDNEP1	0.210234	0.301368	0.24	0.107	1
IFRD1	0.210234	0.275679	0.24	0.107	1
S100A4	0.210377	-0.259323	0.68	0.75	1
ATG12	0.210579	-0.41471	0.16	0.286	1
EHHADH	0.210579	-0.431522	0.16	0.286	1
SNW1	0.210579	-0.448834	0.16	0.286	1
MPP1	0.210579	-0.546665	0.16	0.286	1
STK17B	0.210617	0.685961	0.32	0.214	1
PAFAH1B1	0.210617	-0.404775	0.2	0.321	1
MAP1LC3B	0.211168	0.36494	0.52	0.357	1
RPP38	0.212337	-0.291084	0.04	0.143	1
BECN1	0.212337	-0.303231	0.04	0.143	1
PLXNB2	0.212337	-0.316026	0.04	0.143	1
OIP5-AS1	0.212337	-0.349344	0.04	0.143	1
VAT1	0.212337	-0.364287	0.04	0.143	1
UNC93B1	0.212337	-0.381746	0.04	0.143	1
HINT1	0.212388	-0.47773	0.24	0.393	1
NOP58	0.21338	0.375604	0.36	0.214	1
CFAP36	0.213398	-0.261728	0.08	0.214	1
RUFY1	0.213398	-0.347893	0.08	0.214	1
PCK1	0.213416	0.420891	0.28	0.143	1
SLC25A3	0.214013	-0.357664	0.44	0.571	1
SUCLG2	0.215082	-0.349035	0.12	0.25	1
TSPAN1	0.215082	-0.355261	0.12	0.25	1
GNAI3	0.215256	-0.293002	0.2	0.393	1
VIM	0.21814	-0.485924	0.88	0.821	1
UFM1	0.219573	-0.453698	0.16	0.286	1
MZT2A	0.220318	0.41761	0.24	0.107	1
PTMAP5	0.220318	0.407351	0.24	0.107	1
COPS6	0.220318	0.316799	0.24	0.107	1
SMARCC2	0.220318	0.307317	0.24	0.107	1
DEFB1	0.220487	0.327308	0.24	0.464	1
SH3BGRL	0.221161	-0.252985	0.52	0.679	1
SLC38A2	0.22281	0.344921	0.28	0.143	1
PNKD	0.22281	0.30893	0.28	0.143	1
EPB41L3	0.224896	-0.252851	0.12	0.25	1
VAMP5	0.224896	-0.352207	0.12	0.25	1
EIF3G	0.2255	-0.256242	0.04	0.143	1
NAGPA	0.2255	-0.417144	0.04	0.143	1
ZNHIT1	0.227844	-0.35643	0.2	0.321	1
CSGALNACT2	0.22858	-0.403211	0.24	0.393	1
EID1	0.228839	-0.318187	0.16	0.286	1
FBXL5	0.228843	0.572602	0.32	0.179	1
SNHG16	0.228843	0.390327	0.32	0.179	1
GPRIN3	0.228843	0.386299	0.32	0.179	1
UBE3A	0.23034	0.335762	0.36	0.214	1
POLR2E	0.23034	-0.290749	0.2	0.357	1
ZFYVE16	0.230743	0.58311	0.24	0.107	1
SARAF	0.23194	0.398594	0.36	0.25	1
RB1CC1	0.23194	-0.284504	0.24	0.357	1
NDUFC2	0.23194	-0.316236	0.24	0.357	1
SMDT1	0.232496	0.278162	0.28	0.143	1
SET	0.235363	-0.435072	0.44	0.5	1
GGA1	0.235458	0.744458	0.12	0.036	1
ANAPC15	0.235458	0.64957	0.12	0.036	1
RAF1	0.235458	0.521316	0.12	0.036	1
SRM	0.235458	0.511597	0.12	0.036	1
ASPSCR1	0.235458	0.482973	0.12	0.036	1
KLF11	0.235458	0.479914	0.12	0.036	1
RPS7P1	0.235458	0.47459	0.12	0.036	1
ANKRD37	0.235458	0.44736	0.12	0.036	1
WDR60	0.235458	0.398123	0.12	0.036	1
RAP1GDS1	0.235458	0.361285	0.12	0.036	1
ZDHHC17	0.235458	0.35897	0.12	0.036	1
GABPB1	0.235458	0.335575	0.12	0.036	1
CFL2	0.235458	0.334827	0.12	0.036	1
NT5C	0.235458	0.31285	0.12	0.036	1
HIST2H2BE	0.235458	0.31142	0.12	0.036	1
BRAP	0.235458	0.280154	0.12	0.036	1
AC016831.1	0.235458	0.258907	0.12	0.036	1
BTG1	0.235743	0.342532	0.92	0.857	1
MRPL18	0.235921	-0.257443	0.36	0.464	1
POLR1D	0.236825	-0.336995	0.2	0.321	1
DHX36	0.236825	-0.435001	0.2	0.321	1
TCIRG1	0.237658	-0.271337	0.08	0.179	1
SCPEP1	0.237658	-0.294716	0.08	0.179	1
ABHD5	0.237658	-0.303283	0.08	0.179	1
LRP10	0.237658	-0.314135	0.08	0.179	1
PSMC4	0.237658	-0.315612	0.08	0.179	1
PSAT1	0.237658	-0.377731	0.08	0.179	1
CCDC91	0.237658	-0.403848	0.08	0.179	1
DNAJC19	0.237658	-0.418802	0.08	0.179	1
TMEM160	0.237658	-0.479362	0.08	0.179	1
COMMD3	0.237658	-0.544827	0.08	0.179	1
GPBP1	0.237934	0.391012	0.44	0.357	1
ACADSB	0.238381	-0.363214	0.16	0.286	1
EMP3	0.238505	-0.281567	0.4	0.5	1
POLE3	0.241515	0.268069	0.24	0.107	1
ISG20L2	0.242477	0.346528	0.28	0.143	1
ALCAM	0.243674	0.629142	0.32	0.25	1
MRPL21	0.245474	0.443043	0.24	0.143	1
RTF2	0.245474	-0.305205	0.12	0.25	1
FNDC3A	0.245474	-0.41386	0.12	0.25	1
RBMS1	0.245632	0.834762	0.4	0.25	1
ADI1	0.245632	-0.254343	0.24	0.393	1
ATP5ME	0.246355	-0.413004	0.4	0.5	1
RHOA	0.246726	-0.325058	0.56	0.714	1
MINOS1	0.247618	0.351369	0.32	0.179	1
PBRM1	0.248199	0.646168	0.28	0.179	1
ZFP36L2	0.249095	0.489404	0.44	0.286	1
CCT6A	0.249095	-0.386738	0.28	0.429	1
KLF4	0.249523	-0.510218	0.24	0.357	1
RBMX	0.249861	-0.266116	0.28	0.393	1
GTF2I	0.249904	-0.269238	0.08	0.179	1
PSMD11	0.249904	-0.290332	0.08	0.179	1
CD58	0.249904	-0.312302	0.08	0.179	1
EAF2	0.249904	-0.364269	0.08	0.179	1
EIF2S1	0.249904	-0.386877	0.08	0.179	1
SGK3	0.249904	-0.428081	0.08	0.179	1
AIFM1	0.249904	-0.440028	0.08	0.179	1
GIPC2	0.249904	-0.443369	0.08	0.179	1
YAF2	0.249904	-0.472534	0.08	0.179	1
TREM2	0.251168	0.584745	0.12	0.036	1
SUMF2	0.251168	0.477041	0.12	0.036	1
MEPCE	0.251168	0.474168	0.12	0.036	1
GPBP1L1	0.251168	0.438426	0.12	0.036	1
CAMSAP2	0.251168	0.432901	0.12	0.036	1
TKFC	0.251168	0.387549	0.12	0.036	1
SCML1	0.251168	0.384956	0.12	0.036	1
EDEM1	0.251168	0.368693	0.12	0.036	1
TNFSF15	0.251168	0.362043	0.12	0.036	1
ARHGAP29	0.251168	0.352599	0.12	0.036	1
RAB34	0.251168	0.351694	0.12	0.036	1
METTL21A	0.251168	0.348439	0.12	0.036	1
E2F4	0.251168	0.347922	0.12	0.036	1
CCDC167	0.251168	0.334676	0.12	0.036	1
TLR1	0.251168	0.327335	0.12	0.036	1
MTPAP	0.251168	0.325214	0.12	0.036	1
TMEM170A	0.251168	0.323345	0.12	0.036	1
G6PC3	0.251168	0.321924	0.12	0.036	1
LGR4	0.251168	0.316602	0.12	0.036	1
PIAS2	0.251168	0.310051	0.12	0.036	1
EPB41L4A-AS1	0.251168	0.286184	0.12	0.036	1
OAS1	0.251168	0.283691	0.12	0.036	1
AGPAT1	0.251168	0.281946	0.12	0.036	1
ESRRG	0.251168	0.278689	0.12	0.036	1
CTBP2	0.251168	0.274129	0.12	0.036	1
CAPN7	0.251168	0.270595	0.12	0.036	1
POM121	0.251168	0.270059	0.12	0.036	1
ZBTB8OS	0.251168	0.267452	0.12	0.036	1
SGMS1	0.251168	0.264181	0.12	0.036	1
S1PR3	0.251168	0.256557	0.12	0.036	1
DALRD3	0.251168	0.2565	0.12	0.036	1
TOX3	0.251168	0.254967	0.12	0.036	1
HSPA13	0.251168	0.254438	0.12	0.036	1
REV3L	0.252635	0.301682	0.24	0.107	1
RPL18AP3	0.252755	0.309522	0.28	0.143	1
ARHGAP45	0.252755	0.267251	0.28	0.143	1
CD37	0.253384	0.477078	0.4	0.321	1
S100A10	0.254246	-0.606114	0.6	0.679	1
CHD1	0.255489	0.637583	0.6	0.571	1
AHCYL1	0.25553	-0.372356	0.2	0.321	1
GABARAPL2	0.256244	-0.258704	0.12	0.25	1
UBE2R2	0.257544	-0.480804	0.36	0.5	1
CHD4	0.257725	-0.312391	0.28	0.429	1
SELENOF	0.258298	-0.341132	0.16	0.286	1
CRK	0.258327	-0.253642	0.12	0.214	1
DIAPH1	0.258327	-0.388687	0.12	0.214	1
KIAA1191	0.258655	-0.394112	0.24	0.357	1
RPLP0	0.258887	0.282502	0.72	0.821	1
PSMG2	0.262584	-0.256604	0.08	0.179	1
GTF2F1	0.262584	-0.286873	0.08	0.179	1
COA6	0.262584	-0.320278	0.08	0.179	1
HK1	0.262584	-0.335985	0.08	0.179	1
STAT6	0.262584	-0.33685	0.08	0.179	1
AKR7A3	0.262584	-0.337625	0.08	0.179	1
CISD3	0.262584	-0.345113	0.08	0.179	1
FAR1	0.262584	-0.360193	0.08	0.179	1
CYP4A11	0.262584	-0.364676	0.08	0.179	1
ADGRG1	0.262584	-0.366513	0.08	0.179	1
MRPS18C	0.262584	-0.366606	0.08	0.179	1
RBM42	0.262584	-0.376447	0.08	0.179	1
SOD1	0.262594	-0.355431	0.4	0.5	1
IFI44L	0.263874	0.960689	0.16	0.071	1
PPP3R1	0.263874	0.448188	0.16	0.071	1
TAGAP	0.263874	0.329527	0.16	0.071	1
PGRMC1	0.265258	-0.274676	0.2	0.321	1
XRN2	0.267189	-0.366564	0.32	0.464	1
ZC3H14	0.267338	0.511304	0.24	0.143	1
MRPL36	0.267595	0.46485	0.12	0.036	1
FTH1P20	0.267595	0.369379	0.12	0.036	1
PRKACA	0.267595	0.350344	0.12	0.036	1
MITD1	0.267595	0.336059	0.12	0.036	1
CABIN1	0.267595	0.33182	0.12	0.036	1
MBOAT2	0.267595	0.325963	0.12	0.036	1
RMDN3	0.267595	0.303458	0.12	0.036	1
ACTR6	0.267595	0.300259	0.12	0.036	1
NBPF19	0.267595	0.289319	0.12	0.036	1
LRIF1	0.267595	0.284451	0.12	0.036	1
DNPEP	0.267595	0.279	0.12	0.036	1
DRAM2	0.267595	0.268515	0.12	0.036	1
TAF9	0.267595	0.265618	0.12	0.036	1
FAM136A	0.267595	0.259509	0.12	0.036	1
SIRT1	0.267595	0.256467	0.12	0.036	1
BRI3BP	0.267595	0.255755	0.12	0.036	1
UBE2E1	0.267595	0.253126	0.12	0.036	1
ATP5F1C	0.267663	0.433041	0.4	0.286	1
CSF1R	0.268017	0.486085	0.36	0.25	1
IDH1	0.268677	-0.327843	0.16	0.286	1
HNRNPA3	0.268915	0.353891	0.48	0.357	1
COX7A2	0.269761	-0.30648	0.56	0.714	1
PDXDC1	0.269977	-0.310349	0.12	0.214	1
CRTAP	0.274213	0.262278	0.28	0.143	1
TRAPPC1	0.275238	0.487231	0.32	0.214	1
POLR2J	0.275238	-0.2608	0.2	0.321	1
RTRAF	0.275238	-0.281309	0.2	0.321	1
SLU7	0.275238	-0.330418	0.2	0.321	1
SNX6	0.275603	0.307276	0.44	0.286	1
R3HCC1L	0.275702	-0.259952	0.08	0.179	1
ASPDH	0.275702	-0.283601	0.08	0.179	1
SECTM1	0.275702	-0.310981	0.08	0.179	1
MRPL3	0.275702	-0.334029	0.08	0.179	1
GIMAP7	0.275702	-0.343881	0.08	0.179	1
RNF11	0.275935	0.295809	0.24	0.107	1
TES	0.276868	0.539892	0.36	0.214	1
ARF4	0.276883	-0.27517	0.28	0.393	1
NONO	0.277968	0.363025	0.16	0.071	1
RELB	0.277968	0.337669	0.16	0.071	1
CD4	0.277968	0.329424	0.16	0.071	1
C20orf27	0.277968	0.301578	0.16	0.071	1
MRPL41	0.281982	-0.319189	0.12	0.214	1
ERO1B	0.281982	-0.389197	0.12	0.214	1
PCM1	0.282365	0.323907	0.4	0.25	1
ERN1	0.283427	0.409755	0.2	0.107	1
HLA-DPB1	0.283581	0.429821	0.68	0.75	1
HNRNPK	0.283972	0.296582	0.68	0.571	1
VMO1	0.284746	-0.320486	0.12	0.036	1
ELOC	0.285471	-0.263977	0.2	0.321	1
CCT8	0.28926	-0.257849	0.08	0.179	1
NR1D2	0.28926	-0.258396	0.08	0.179	1
TPP2	0.28926	-0.263509	0.08	0.179	1
PLCB2	0.28926	-0.268721	0.08	0.179	1
GRSF1	0.28926	-0.298335	0.08	0.179	1
ENPEP	0.28926	-0.341141	0.08	0.179	1
GLRX5	0.28926	-0.34116	0.08	0.179	1
EFR3A	0.28926	-0.424859	0.08	0.179	1
ATXN7L3B	0.290504	0.471381	0.24	0.143	1
CD84	0.291102	-0.360932	0.16	0.25	1
SH3GLB1	0.292147	-0.365765	0.32	0.429	1
APOC1	0.292565	1.1328	0.16	0.071	1
GOLIM4	0.292565	0.575129	0.16	0.071	1
STX4	0.292565	0.475269	0.16	0.071	1
SMCO4	0.292565	0.434957	0.16	0.071	1
ARHGEF6	0.292565	0.422891	0.16	0.071	1
BHLHE41	0.292565	0.418822	0.16	0.071	1
CLPB	0.292565	0.414522	0.16	0.071	1
HSD17B12	0.292565	0.409558	0.16	0.071	1
OSTM1	0.292565	0.392477	0.16	0.071	1
KNG1	0.292565	0.375393	0.16	0.071	1
ERBB3	0.292565	0.37237	0.16	0.071	1
MARK2	0.292565	0.357635	0.16	0.071	1
MRPL55	0.292565	0.342223	0.16	0.071	1
PHAX	0.292565	0.322253	0.16	0.071	1
GPNMB	0.292565	0.316573	0.16	0.071	1
TNRC6A	0.294343	-0.403948	0.12	0.214	1
SLC9A3R1	0.295958	0.258082	0.32	0.214	1
MRPS33	0.295958	-0.290768	0.2	0.321	1
FAM32A	0.296463	0.638625	0.2	0.107	1
MAP3K5	0.296463	0.521691	0.2	0.107	1
DDX21	0.296501	-0.260393	0.56	0.679	1
TM9SF3	0.296884	0.336616	0.28	0.143	1
HES1	0.301172	0.395289	0.6	0.429	1
MTHFD2	0.301518	0.524379	0.28	0.179	1
SH3BP5	0.301518	-0.28011	0.16	0.286	1
CD86	0.301619	0.307193	0.44	0.321	1
ZNF703	0.30258	0.65201	0.24	0.143	1
RPS19BP1	0.302742	-0.457216	0.16	0.25	1
TOMM22	0.303259	-0.299225	0.08	0.179	1
DUT	0.303259	-0.31122	0.08	0.179	1
BAG3	0.304946	0.311663	0.48	0.357	1
CIB1	0.305832	-0.308555	0.28	0.393	1
CXCL3	0.306701	0.75091	0.32	0.214	1
ELF2	0.307063	-0.292706	0.12	0.214	1
RBMX2	0.307063	-0.301067	0.12	0.214	1
AGTRAP	0.307063	-0.33131	0.12	0.214	1
MAP3K8	0.307126	-0.492206	0.28	0.357	1
ANKRD13A	0.307668	0.383706	0.16	0.071	1
CPT1A	0.307668	0.340283	0.16	0.071	1
SETD5	0.307668	0.300542	0.16	0.071	1
PDIA4	0.307668	0.280265	0.16	0.071	1
MIB1	0.307668	0.254007	0.16	0.071	1
FGD4	0.307772	0.398467	0.36	0.25	1
SELENOT	0.307772	-0.309917	0.24	0.357	1
PMAIP1	0.309894	0.601043	0.2	0.107	1
CX3CR1	0.309894	0.563809	0.2	0.107	1
ZMYND8	0.309894	0.43211	0.2	0.107	1
FTH1P10	0.313036	0.640073	0.28	0.179	1
USP10	0.313036	-0.276667	0.16	0.286	1
FRG1	0.313036	-0.287787	0.16	0.286	1
HLA-DQA1	0.313696	0.317135	0.6	0.464	1
GSTK1	0.314433	-0.35256	0.36	0.464	1
ANXA4	0.314687	-0.305785	0.16	0.25	1
PRDX2	0.315964	-0.421499	0.2	0.286	1
PDIA6	0.317422	0.467762	0.36	0.286	1
PTBP3	0.317698	0.259988	0.32	0.214	1
RAC2	0.317698	-0.305974	0.2	0.321	1
CCT4	0.317698	-0.381547	0.2	0.321	1
GARS	0.320142	-0.255995	0.12	0.214	1
SMIM4	0.320142	-0.259782	0.12	0.214	1
SVIP	0.320142	-0.270062	0.12	0.214	1
FTSJ3	0.320142	-0.276212	0.12	0.214	1
TRMT112	0.321169	-0.32129	0.32	0.429	1
CDKN1C	0.323279	0.544899	0.16	0.071	1
TTC14	0.323279	0.460747	0.16	0.071	1
DOCK10	0.323279	0.365288	0.16	0.071	1
HNMT	0.323279	0.36445	0.16	0.071	1
INIP	0.323279	0.319728	0.16	0.071	1
PDS5A	0.323279	0.303706	0.16	0.071	1
PTOV1	0.323279	0.288592	0.16	0.071	1
SCIMP	0.323721	0.37243	0.2	0.107	1
UVRAG	0.323721	0.323347	0.2	0.107	1
FGD5-AS1	0.323721	0.320409	0.2	0.107	1
VIRMA	0.323721	0.301168	0.2	0.107	1
PSMB5	0.323721	0.294712	0.2	0.107	1
RPF1	0.323721	0.287988	0.2	0.107	1
NOSIP	0.323721	0.255264	0.2	0.107	1
MGST3	0.324839	-0.272022	0.16	0.286	1
NRDC	0.326938	-0.418857	0.16	0.25	1
TCF4	0.327719	0.547089	0.24	0.143	1
AKAP17A	0.327719	0.425042	0.24	0.143	1
SUZ12	0.327719	0.300582	0.24	0.143	1
MED13L	0.327862	0.338367	0.44	0.357	1
PPP1CA	0.328951	0.296279	0.32	0.214	1
MTND2P28	0.328951	0.279657	0.32	0.214	1
RFC1	0.328951	-0.384415	0.2	0.321	1
IER5	0.329044	0.488868	0.36	0.25	1
CD55	0.329048	0.553048	0.4	0.321	1
ZCCHC6	0.329048	-0.391971	0.32	0.393	1
VCL	0.33358	-0.287308	0.12	0.214	1
ZNF91	0.33358	-0.294799	0.12	0.214	1
PRPF6	0.33358	-0.398964	0.12	0.214	1
SLC16A9	0.335011	-0.496348	0.24	0.321	1
DDIT3	0.336928	0.403837	0.28	0.179	1
SNX27	0.339276	-0.290325	0.2	0.286	1
SERINC3	0.339276	-0.412275	0.2	0.286	1
FBRS	0.339397	0.336038	0.16	0.071	1
STARD7	0.339397	0.288633	0.16	0.071	1
INSR	0.339495	-0.304261	0.16	0.25	1
BDH2	0.339495	-0.333651	0.16	0.25	1
TMBIM1	0.339495	-0.398097	0.16	0.25	1
BPTF	0.34003	-0.387383	0.24	0.357	1
RBX1	0.340459	-0.255449	0.2	0.321	1
RFXANK	0.340579	-0.251741	0.04	0.107	1
TIMM8A	0.340579	-0.253271	0.04	0.107	1
THAP9-AS1	0.340579	-0.254269	0.04	0.107	1
KIF13A	0.340579	-0.254605	0.04	0.107	1
PEMT	0.340579	-0.254847	0.04	0.107	1
SLC7A9	0.340579	-0.256021	0.04	0.107	1
USP25	0.340579	-0.256454	0.04	0.107	1
SCO1	0.340579	-0.258736	0.04	0.107	1
CLK3	0.340579	-0.262362	0.04	0.107	1
MFAP1	0.340579	-0.263118	0.04	0.107	1
NADK2	0.340579	-0.265853	0.04	0.107	1
DBT	0.340579	-0.266509	0.04	0.107	1
FAM210B	0.340579	-0.267006	0.04	0.107	1
MSI2	0.340579	-0.267662	0.04	0.107	1
C19orf66	0.340579	-0.269561	0.04	0.107	1
AC007969.1	0.340579	-0.271848	0.04	0.107	1
LINC00877	0.340579	-0.275148	0.04	0.107	1
FAS	0.340579	-0.279448	0.04	0.107	1
ARF3	0.340579	-0.282936	0.04	0.107	1
PIM1	0.340579	-0.283283	0.04	0.107	1
GLOD4	0.340579	-0.284869	0.04	0.107	1
SNHG7	0.340579	-0.286081	0.04	0.107	1
CDC37L1	0.340579	-0.286764	0.04	0.107	1
KLHL8	0.340579	-0.289204	0.04	0.107	1
ITSN1	0.340579	-0.291569	0.04	0.107	1
ZNF330	0.340579	-0.291853	0.04	0.107	1
PTCD3	0.340579	-0.294814	0.04	0.107	1
FMO4	0.340579	-0.303585	0.04	0.107	1
PPM1K	0.340579	-0.313736	0.04	0.107	1
2020-03-02	0.340579	-0.313737	0.04	0.107	1
COMMD10	0.340579	-0.315869	0.04	0.107	1
THUMPD3	0.340579	-0.319699	0.04	0.107	1
FAM105A	0.340579	-0.336599	0.04	0.107	1
POLR3K	0.340579	-0.341496	0.04	0.107	1
VCPIP1	0.340579	-0.349054	0.04	0.107	1
UNC45A	0.340579	-0.35158	0.04	0.107	1
TRIM14	0.340579	-0.354426	0.04	0.107	1
SLC2A2	0.340579	-0.361559	0.04	0.107	1
WASHC3	0.340579	-0.38254	0.04	0.107	1
NUDT6	0.340579	-0.408313	0.04	0.107	1
NKAIN4	0.340579	-0.411671	0.04	0.107	1
SLC25A4	0.340579	-0.415304	0.04	0.107	1
HMGCS1	0.340579	-0.428014	0.04	0.107	1
PRRG4	0.340579	-0.490137	0.04	0.107	1
SYNE2	0.340783	0.393374	0.24	0.143	1
RSRC2	0.343044	-0.257432	0.32	0.464	1
DHRS4L2	0.346372	-0.331586	0.24	0.321	1
STK38	0.347376	-0.350022	0.12	0.214	1
TXNIP	0.347505	0.345391	0.68	0.607	1
FGL2	0.348203	0.587709	0.44	0.357	1
FAM133B	0.349303	0.370036	0.28	0.179	1
NOL7	0.349303	0.325455	0.28	0.179	1
LPP	0.349303	0.321217	0.28	0.179	1
WDR83OS	0.349303	0.255584	0.28	0.179	1
ACSL4	0.351336	-0.432813	0.2	0.286	1
CGGBP1	0.352562	0.38004	0.2	0.107	1
RPL3P4	0.352562	0.265468	0.2	0.107	1
LRG1	0.354176	0.357056	0.24	0.143	1
KMT2C	0.354732	0.725018	0.48	0.429	1
ROCK1	0.354732	0.403474	0.52	0.393	1
HLA-C	0.355276	0.263346	0.76	0.75	1
DAPP1	0.356022	0.315566	0.16	0.071	1
USP36	0.357975	0.596233	0.32	0.25	1
COX5A	0.358389	0.41714	0.4	0.286	1
TXN	0.360065	-0.504815	0.52	0.643	1
HSPA4L	0.360652	-0.260768	0.04	0.107	1
SESN1	0.360652	-0.267453	0.04	0.107	1
TM2D3	0.360652	-0.288648	0.04	0.107	1
KIAA2026	0.360652	-0.307031	0.04	0.107	1
ACSF2	0.360652	-0.309956	0.04	0.107	1
BST1	0.360652	-0.331334	0.04	0.107	1
ATF3	0.361065	0.512835	0.6	0.464	1
ESF1	0.36153	-0.304359	0.12	0.214	1
FCGR1A	0.36153	-0.353126	0.12	0.214	1
SF1	0.361962	0.271919	0.28	0.179	1
ARF6	0.364238	0.317553	0.32	0.214	1
2020-09-02	0.364238	0.295962	0.32	0.214	1
TOMM20	0.364238	0.295346	0.32	0.214	1
BCL3	0.365523	-0.280417	0.16	0.25	1
ARL4A	0.367521	0.323956	0.52	0.5	1
ZMIZ1	0.367573	0.572111	0.2	0.107	1
AHCTF1	0.367573	0.287107	0.2	0.107	1
MRPS36	0.367573	0.260406	0.2	0.107	1
DCUN1D1	0.367896	0.354468	0.24	0.143	1
CITED2	0.367896	0.341085	0.24	0.143	1
RAD23B	0.367896	0.340975	0.24	0.143	1
BST2	0.367896	0.290426	0.24	0.143	1
PARP14	0.374376	0.505167	0.36	0.25	1
OGFRL1	0.375379	0.465996	0.44	0.393	1
BCLAF1	0.375573	0.4894	0.48	0.393	1
TTC1	0.376258	0.550824	0.28	0.214	1
RPL14	0.377759	0.272107	0.92	0.964	1
MLF2	0.378991	-0.255706	0.16	0.25	1
EBP	0.378991	-0.283642	0.16	0.25	1
QDPR	0.378991	-0.349479	0.16	0.25	1
IVNS1ABP	0.380915	0.412288	0.4	0.286	1
EGR2	0.381452	-0.257557	0.04	0.107	1
LSM5	0.381452	-0.268873	0.04	0.107	1
GSPT1	0.381906	0.339445	0.32	0.25	1
PPP2CA	0.381943	0.432587	0.24	0.143	1
PTDSS1	0.381943	0.286272	0.24	0.143	1
RPN1	0.381943	0.251933	0.24	0.143	1
ENG	0.382977	0.34465	0.2	0.107	1
TIMM17B	0.382977	0.3367	0.2	0.107	1
QPCT	0.382977	0.260534	0.2	0.107	1
HIST1H4C	0.383099	0.408917	0.4	0.321	1
IL1B	0.384838	-0.756024	0.56	0.607	1
RTF1	0.388131	0.321461	0.28	0.179	1
NDFIP1	0.389119	-0.278881	0.2	0.286	1
RAB20	0.390904	-0.250698	0.12	0.214	1
YIPF4	0.390904	-0.259158	0.12	0.214	1
OCIAD2	0.390904	-0.272666	0.12	0.214	1
NDUFA5	0.392761	-0.265696	0.16	0.25	1
RAP1A	0.394231	-0.269344	0.24	0.321	1
TGOLN2	0.395733	-0.453956	0.28	0.357	1
FNDC3B	0.398424	0.322767	0.36	0.25	1
LGALS2	0.398551	-0.338597	0.52	0.5	1
RPL21P28	0.401637	0.31198	0.28	0.179	1
GIGYF1	0.402972	0.382164	0.04	0.107	1
PSMD5	0.402972	0.291706	0.04	0.107	1
OST4	0.406162	-0.258213	0.32	0.393	1
HEBP2	0.407803	-0.451778	0.28	0.357	1
GPS1	0.408908	-0.257118	0.08	0.143	1
RXRA	0.408908	-0.268306	0.08	0.143	1
RCAN1	0.408908	-0.271671	0.08	0.143	1
LEPROTL1	0.408908	-0.285152	0.08	0.143	1
BRWD3	0.408908	-0.293858	0.08	0.143	1
KIF3B	0.408908	-0.31194	0.08	0.143	1
TNIP1	0.408908	-0.315694	0.08	0.143	1
BCL2L1	0.408908	-0.316755	0.08	0.143	1
PIPOX	0.408908	-0.321679	0.08	0.143	1
FAM173A	0.408908	-0.335126	0.08	0.143	1
NDEL1	0.408908	-0.351678	0.08	0.143	1
FERMT3	0.408908	-0.418784	0.08	0.143	1
P2RX4	0.408908	-0.454533	0.08	0.143	1
MORF4L1	0.411055	0.257524	0.68	0.714	1
APOBEC3A	0.413164	0.270355	0.2	0.357	1
JUN	0.413403	-0.337077	0.64	0.679	1
POMP	0.413835	0.366909	0.44	0.429	1
YTHDC1	0.41464	0.608467	0.48	0.536	1
MRPL20	0.41563	0.264202	0.28	0.214	1
ATP6V1D	0.41563	-0.266315	0.2	0.286	1
FUS	0.42553	0.483263	0.44	0.357	1
NPC2	0.425791	0.425136	0.72	0.857	1
TMEM14B	0.426018	-0.347493	0.16	0.214	1
SNHG5	0.427375	-0.255885	0.4	0.571	1
ZBTB38	0.427526	-0.262892	0.08	0.143	1
AFG3L2	0.427526	-0.284882	0.08	0.143	1
SLC2A4RG	0.427526	-0.285696	0.08	0.143	1
AC016747.1	0.427526	-0.307454	0.08	0.143	1
MSRB2	0.427526	-0.328139	0.08	0.143	1
DDX18	0.428502	0.339367	0.4	0.286	1
PXK	0.429276	0.327949	0.28	0.214	1
ATP13A3	0.42948	0.53463	0.28	0.179	1
SH3BP2	0.431509	-0.269802	0.12	0.179	1
PYROXD1	0.431509	-0.322789	0.12	0.179	1
WIPI2	0.431509	-0.396756	0.12	0.179	1
TXNDC17	0.432591	-0.279007	0.28	0.357	1
TPM1	0.435854	0.554333	0.24	0.179	1
CCAR1	0.435854	0.479175	0.24	0.179	1
ISG15	0.442269	0.470117	0.4	0.321	1
MT-TW	0.443179	0.345386	0.28	0.214	1
SSBP1	0.443179	-0.25831	0.2	0.286	1
NDUFC1	0.443813	-0.293076	0.2	0.25	1
EIF4A3	0.44523	0.569269	0.64	0.679	1
ATP6AP2	0.445305	0.456788	0.36	0.286	1
HNRNPF	0.445305	0.374317	0.36	0.286	1
SLC4A1AP	0.446629	-0.25896	0.08	0.143	1
MTTP	0.446629	-0.264257	0.08	0.143	1
ABCD3	0.446629	-0.303492	0.08	0.143	1
CCDC174	0.446629	-0.306998	0.08	0.143	1
AP3B1	0.448446	-0.545963	0.12	0.179	1
METTL9	0.450803	0.54526	0.24	0.179	1
CWF19L2	0.45384	0.491135	0.2	0.143	1
LRRC58	0.45384	0.399986	0.2	0.143	1
YWHAH	0.45384	0.319224	0.2	0.143	1
CCDC6	0.45384	0.278271	0.2	0.143	1
SNU13	0.455304	0.394066	0.44	0.321	1
RAD21	0.457335	0.405102	0.28	0.214	1
BCAS2	0.457335	0.380785	0.28	0.214	1
GALNT1	0.458414	-0.33978	0.2	0.25	1
EIF3J	0.461538	0.331248	0.56	0.429	1
AGPAT3	0.465755	-0.252055	0.12	0.179	1
CCNK	0.466209	-0.250414	0.08	0.143	1
PGRMC2	0.466209	-0.28119	0.08	0.143	1
PDK4	0.466209	-0.281202	0.08	0.143	1
GLYR1	0.466209	-0.284586	0.08	0.143	1
FAM213A	0.466209	-0.294965	0.08	0.143	1
GLUL	0.467175	-0.349084	0.4	0.429	1
SFMBT2	0.46742	0.38446	0.16	0.107	1
BTAF1	0.46742	0.378736	0.16	0.107	1
TPD52L2	0.46742	0.302035	0.16	0.107	1
RBP5	0.469337	-0.639255	0.24	0.286	1
PDZK1	0.470423	0.38797	0.2	0.143	1
JARID2	0.470423	0.294113	0.2	0.143	1
MALT1	0.470423	0.263319	0.2	0.143	1
XAF1	0.473098	0.42794	0.32	0.25	1
YY1	0.473098	0.36035	0.32	0.25	1
MTCO1P12	0.475274	0.384538	0.48	0.464	1
PPIA	0.477498	0.404698	0.76	0.714	1
LIMS1	0.478752	0.425542	0.64	0.571	1
SSU72	0.481554	0.373934	0.24	0.179	1
HES4	0.484539	0.362761	0.44	0.429	1
RARS	0.486175	0.551428	0.16	0.107	1
MCTP1	0.486396	-0.322012	0.2	0.286	1
PRCP	0.487038	0.463138	0.32	0.25	1
SFT2D2	0.487038	-0.268652	0.24	0.321	1
NDUFAF8	0.487335	0.440722	0.2	0.143	1
SPN	0.487335	0.371743	0.2	0.143	1
DUSP6	0.489625	0.664046	0.32	0.286	1
PHLDA1	0.493154	0.317211	0.4	0.321	1
EGR3	0.493305	0.520698	0.12	0.071	1
NOTCH2	0.493305	0.433608	0.12	0.071	1
CEP170	0.493305	0.430905	0.12	0.071	1
TBC1D15	0.493305	0.407224	0.12	0.071	1
CLN8	0.493305	0.379916	0.12	0.071	1
TBC1D23	0.493305	0.366737	0.12	0.071	1
CARD8	0.493305	0.311798	0.12	0.071	1
TTF1	0.493305	0.262349	0.12	0.071	1
G0S2	0.499151	-0.498826	0.72	0.714	1
PRPF38B	0.499154	0.338425	0.44	0.357	1
BAZ1A	0.499154	-0.382456	0.36	0.429	1
SAMHD1	0.499755	0.384899	0.6	0.571	1
DNAJA2	0.501293	0.26176	0.28	0.214	1
FAAP20	0.501459	-0.292427	0.12	0.179	1
NDUFA3	0.501476	-0.376429	0.44	0.464	1
SPCS3	0.503795	-0.257433	0.2	0.25	1
AK2	0.503795	-0.34585	0.2	0.25	1
COMMD8	0.503795	-0.350397	0.2	0.25	1
ITPR2	0.503795	-0.402618	0.2	0.25	1
MAPRE1	0.50457	0.454043	0.2	0.143	1
PSMB8	0.50457	0.261515	0.2	0.143	1
KATNBL1	0.50533	0.578213	0.16	0.107	1
LATS2	0.50533	0.417284	0.16	0.107	1
DPH3	0.50533	0.27457	0.16	0.107	1
SDF2L1	0.50533	0.257639	0.16	0.107	1
EEF2	0.512896	0.441179	0.64	0.679	1
OSBPL11	0.513413	0.37071	0.24	0.179	1
MZT2B	0.513413	0.322396	0.24	0.179	1
DNAJB6	0.515569	-0.334853	0.6	0.643	1
SIGLEC10	0.515737	0.530756	0.12	0.071	1
CD24	0.515737	0.47744	0.12	0.071	1
MCUB	0.515737	0.318237	0.12	0.071	1
PRAM1	0.515737	0.309272	0.12	0.071	1
PABPN1	0.515737	0.260414	0.12	0.071	1
CENPX	0.515737	0.252279	0.12	0.071	1
C19orf53	0.516428	0.270491	0.28	0.214	1
CSTA	0.517607	-0.53406	0.28	0.321	1
KHDRBS1	0.519363	-0.353537	0.36	0.393	1
ARAP2	0.51984	-0.283768	0.12	0.179	1
PAG1	0.51984	-0.358861	0.12	0.179	1
SRA1	0.522121	0.395019	0.2	0.143	1
EIF4E2	0.522121	0.341946	0.2	0.143	1
TDG	0.522121	0.330678	0.2	0.143	1
EBAG9	0.522543	-0.27818	0.16	0.214	1
SMC6	0.524875	0.406812	0.16	0.107	1
GBP4	0.524875	0.399804	0.16	0.107	1
SRC	0.524875	0.38399	0.16	0.107	1
AGTPBP1	0.524875	0.34611	0.16	0.107	1
SF3A1	0.524875	0.335251	0.16	0.107	1
TM7SF3	0.524875	0.322581	0.16	0.107	1
CHTOP	0.524875	0.304173	0.16	0.107	1
COMT	0.524875	0.300753	0.16	0.107	1
LAMTOR4	0.525119	-0.485713	0.36	0.429	1
LAP3	0.527597	-0.28286	0.24	0.286	1
NXF1	0.527597	-0.3933	0.24	0.286	1
DBF4	0.527709	0.281135	0.08	0.143	1
WAC	0.529744	0.264627	0.24	0.179	1
RAB14	0.531796	0.261768	0.28	0.214	1
DPY30	0.531902	0.457541	0.32	0.286	1
EIF3E	0.532712	0.325596	0.4	0.357	1
SHOC2	0.533383	0.465082	0.36	0.321	1
YWHAQ	0.535317	-0.268391	0.2	0.25	1
FAM198B	0.538687	0.563524	0.12	0.071	1
PARD6G-AS1	0.538687	0.385901	0.12	0.071	1
ANKRA2	0.538687	0.378287	0.12	0.071	1
TFPI	0.538687	0.368048	0.12	0.071	1
MRPS26	0.538687	0.334343	0.12	0.071	1
CCDC186	0.539658	-0.511042	0.16	0.214	1
NUP58	0.539981	0.252649	0.2	0.143	1
SYAP1	0.541755	0.491771	0.56	0.607	1
CCDC18	0.5448	0.274555	0.16	0.107	1
RABAC1	0.5448	0.272608	0.16	0.107	1
SOAT1	0.5448	0.257288	0.16	0.107	1
PFDN1	0.544949	0.321429	0.32	0.25	1
[truncated: 175 more rows]

## Sheet: MC
gene id	p value	avg logFC	pct.1	pct.2	adjusted p value
HLA-DRB5	1.78e-11	-2.05375	0.196	0.929	4.21e-07
FAM49B	2.5e-09	-1.07626	0.186	0.929	5.92e-05
NUF2	4.88e-08	-0.520599	0	0.286	0.00115364
EFNB1	4.88e-08	-0.585414	0	0.286	0.00115364
POU2F2	8.18e-08	-0.857552	0.147	0.786	0.00193515
FCGBP	1.11e-07	-1.92828	0.049	0.5	0.00263145
GPX3	3.45e-07	-1.16552	0.422	1	0.0081534
ACTB	4.08e-07	-0.949808	0.902	1	0.00964512
RPS4Y1	4.78e-07	-0.726939	0.049	0.5	0.0113186
BAZ2A	1.67e-06	-0.640217	0.059	0.5	0.0396032
CD300E	2.22e-06	-0.705857	0.01	0.286	0.0524559
CFP	2.5e-06	-0.793749	0.01	0.286	0.0590501
SERPINB9	2.56e-06	-0.750056	0.069	0.5	0.0606057
VHL	2.56e-06	-0.860316	0.069	0.5	0.0606057
BAHD1	2.6e-06	-0.37033	0	0.214	0.0614148
ALDH8A1	2.6e-06	-0.39949	0	0.214	0.0614148
DIAPH3	2.6e-06	-0.452206	0	0.214	0.0614148
ZDHHC20	2.6e-06	-0.504569	0	0.214	0.0614148
PCLAF	2.6e-06	-0.513887	0	0.214	0.0614148
DHRS7B	2.6e-06	-0.597904	0	0.214	0.0614148
BLMH	2.81e-06	-0.537615	0.01	0.286	0.0664361
LILRB1	3.28e-06	-1.25359	0.167	0.714	0.0777222
MPHOSPH10	3.5e-06	-0.738112	0.118	0.643	0.0828105
GBP1	4.58e-06	-0.779613	0.069	0.5	0.108268
PSMD11	5.28e-06	-0.694821	0.069	0.5	0.124898
RAD51AP1	5.79e-06	-0.764143	0.029	0.357	0.137068
ETV5	8.25e-06	-0.702717	0.098	0.571	0.195153
SYVN1	8.33e-06	-0.461095	0.029	0.357	0.196992
VMP1	1.02e-05	-0.705805	0.196	0.786	0.241821
MT-RNR1	1.46e-05	0.941122	1	1	0.345023
DR1	1.53e-05	-0.406422	0.078	0.5	0.362036
SNW1	2.11e-05	-0.771457	0.216	0.786	0.49881
PHACTR4	2.34e-05	-0.687041	0.137	0.643	0.552679
LRRC58	2.95e-05	-0.513305	0.059	0.429	0.69903
RAP2C	3.47e-05	-0.450471	0.02	0.286	0.820179
NQO1	3.47e-05	-0.719574	0.02	0.286	0.820179
MKI67	3.5e-05	-1.19197	0.039	0.357	0.82846
TMSB10	4.17e-05	-0.602273	0.98	1	0.987647
GTSE1	4.2e-05	-0.553864	0.02	0.286	0.9934
ZFAND3	4.44e-05	-0.463873	0.039	0.357	1
BABAM1	4.44e-05	-0.495729	0.039	0.357	1
FASN	4.44e-05	-0.659867	0.039	0.357	1
RFC1	5.22e-05	-0.589623	0.167	0.714	1
FBXL5	5.6e-05	-0.531521	0.088	0.5	1
DYNC1I2	5.66e-05	-0.907437	0.49	0.857	1
EVI5	5.92e-05	-0.802584	0.098	0.5	1
MYO1F	7.19e-05	-0.603966	0.127	0.571	1
CEP85	8.11e-05	-0.369598	0.01	0.214	1
RICTOR	8.11e-05	-0.447446	0.01	0.214	1
TFCP2	8.11e-05	-0.47093	0.01	0.214	1
RLIM	8.76e-05	-0.508005	0.069	0.429	1
C1QB	9.01e-05	-1.07103	0.637	1	1
TXLNA	9.07e-05	-0.352022	0.01	0.214	1
LINC02432	9.07e-05	-0.356995	0.01	0.214	1
MED15	9.07e-05	-0.357779	0.01	0.214	1
ACTR8	9.07e-05	-0.36692	0.01	0.214	1
NUP160	9.07e-05	-0.368459	0.01	0.214	1
TIMELESS	9.07e-05	-0.37585	0.01	0.214	1
XYLB	9.07e-05	-0.40068	0.01	0.214	1
PPP2R5D	9.07e-05	-0.406441	0.01	0.214	1
TK1	9.07e-05	-0.456422	0.01	0.214	1
SREBF2	9.07e-05	-0.513551	0.01	0.214	1
RNVU1-15	9.07e-05	-0.554481	0.01	0.214	1
PTPN1	9.27e-05	-0.687098	0.137	0.571	1
SCARB2	9.3e-05	-0.62963	0.176	0.643	1
ELP2	0.00010132	-0.282232	0.01	0.214	1
CKAP2L	0.00010132	-0.356508	0.01	0.214	1
UPF1	0.00010132	-0.394084	0.01	0.214	1
CARHSP1	0.00010132	-0.491012	0.01	0.214	1
ANLN	0.00010132	-0.498462	0.01	0.214	1
CENPU	0.00010132	-0.500674	0.01	0.214	1
NCAPD2	0.00010132	-0.607081	0.01	0.214	1
DENND1C	0.000113109	-0.285903	0.01	0.214	1
EXOC2	0.000113109	-0.294475	0.01	0.214	1
CALCOCO1	0.000113109	-0.352057	0.01	0.214	1
ZWINT	0.000113109	-0.362477	0.01	0.214	1
FANCL	0.000113109	-0.403714	0.01	0.214	1
B3GAT3	0.000113109	-0.405009	0.01	0.214	1
CDCA2	0.000113109	-0.457086	0.01	0.214	1
TPX2	0.000113109	-0.709299	0.01	0.214	1
ATP7A	0.000118039	-0.700139	0.029	0.286	1
ARHGEF6	0.000119357	-0.57069	0.049	0.357	1
EI24	0.000122075	-0.588455	0.078	0.429	1
FYB1	0.000127101	-0.75223	0.578	1	1
MCM3	0.000128336	-0.641716	0.029	0.286	1
ABI3	0.000135514	-0.872354	0.147	0.571	1
BORA	0.000136171	-0.259947	0	0.143	1
CAMTA2	0.000136171	-0.269583	0	0.143	1
MESP1	0.000136171	-0.269945	0	0.143	1
TELO2	0.000136171	-0.269945	0	0.143	1
ASPDH	0.000136171	-0.278043	0	0.143	1
2020-03-03	0.000136171	-0.283036	0	0.143	1
SPAG5	0.000136171	-0.288799	0	0.143	1
CLK2	0.000136171	-0.292838	0	0.143	1
NDC80	0.000136171	-0.303436	0	0.143	1
PTPN7	0.000136171	-0.303436	0	0.143	1
TFAP4	0.000136171	-0.308869	0	0.143	1
TMEM135	0.000136171	-0.316099	0	0.143	1
FOXM1	0.000136171	-0.317102	0	0.143	1
ENSG00000274428	0.000136171	-0.324323	0	0.143	1
CLRN3	0.000136171	-0.324351	0	0.143	1
CHSY1	0.000136171	-0.328932	0	0.143	1
AC097534.2	0.000136171	-0.328932	0	0.143	1
ECT2	0.000136171	-0.328932	0	0.143	1
FAM111A-DT	0.000136171	-0.329285	0	0.143	1
AC016876.1	0.000136171	-0.329285	0	0.143	1
ORC6	0.000136171	-0.333669	0	0.143	1
WDFY3-AS2	0.000136171	-0.341278	0	0.143	1
OCRL	0.000136171	-0.359664	0	0.143	1
ASF1B	0.000136171	-0.369484	0	0.143	1
HIST1H4F	0.000136171	-0.377065	0	0.143	1
HIST1H4J	0.000136171	-0.380392	0	0.143	1
LILRB5	0.000136171	-0.384085	0	0.143	1
SAPCD2	0.000136171	-0.408184	0	0.143	1
TCF20	0.000136171	-0.412754	0	0.143	1
TROAP	0.000136171	-0.426161	0	0.143	1
FGB	0.000136171	-0.437619	0	0.143	1
KATNAL1	0.000136171	-0.444281	0	0.143	1
RNF40	0.000136171	-0.475625	0	0.143	1
RASGRP4	0.000136171	-0.513364	0	0.143	1
NFYA	0.000136171	-0.52528	0	0.143	1
CCDC150	0.000136171	-0.563619	0	0.143	1
NT5DC2	0.000136171	-0.66646	0	0.143	1
SHISA5	0.000136515	-0.520243	0.069	0.429	1
FADS1	0.000139081	-0.533834	0.137	0.571	1
FCN1	0.000139476	-0.797668	0.029	0.286	1
RBM43	0.000147516	-0.651795	0.049	0.357	1
METRNL	0.000147516	-0.683235	0.049	0.357	1
MOB4	0.000158216	-0.530016	0.049	0.357	1
CR1	0.000164543	-0.776954	0.029	0.286	1
ADAP2	0.000169747	-0.766583	0.353	0.857	1
SDAD1	0.000170025	-0.64277	0.196	0.714	1
CCR1	0.000175393	-0.595505	0.078	0.429	1
PSMC4	0.000178357	-0.518917	0.137	0.571	1
FMNL3	0.000178611	-0.466443	0.029	0.286	1
SLMAP	0.000178611	-0.473531	0.029	0.286	1
KPNA1	0.000184704	-0.490027	0.108	0.5	1
FAM120A	0.000192623	-0.704451	0.216	0.714	1
CERS6	0.00019274	-0.794431	0.088	0.429	1
CARM1	0.000193804	-0.458159	0.029	0.286	1
BAZ1A	0.000221433	-0.729464	0.157	0.571	1
EIPR1	0.000227905	-0.558935	0.029	0.286	1
GSTA1	0.000227905	-0.589144	0.029	0.286	1
TLN1	0.000238009	-0.738944	0.451	1	1
CD163	0.000240241	-1.01983	0.235	0.714	1
CMIP	0.00024083	-0.537511	0.108	0.5	1
MYC	0.000246995	-0.433951	0.029	0.286	1
POLR2B	0.000254223	-0.600226	0.147	0.571	1
AL009174.1	0.000267577	-0.410746	0.029	0.286	1
HPF1	0.000280987	-0.446218	0.078	0.429	1
WDR70	0.000291188	-0.631914	0.118	0.5	1
NUCB1	0.000307053	-0.779379	0.147	0.571	1
ABRACL	0.000321356	-0.809037	0.157	0.571	1
EPB41L3	0.000327588	-0.822118	0.127	0.5	1
SCAF11	0.000358911	-0.787306	0.49	0.929	1
CROT	0.000371321	-0.44131	0.059	0.357	1
DYNLT1	0.000385874	-0.557599	0.157	0.571	1
FCGR3A	0.000396922	-0.810531	0.353	0.857	1
CNTLN	0.000398701	-0.670947	0.127	0.5	1
HMOX1	0.000399783	-0.850456	0.275	0.714	1
LRRC25	0.000401059	-0.619199	0.088	0.429	1
SMPDL3A	0.000421371	-0.478927	0.059	0.357	1
SDC3	0.000421371	-0.757212	0.059	0.357	1
ZYX	0.000437246	-0.611783	0.196	0.643	1
LUC7L3	0.000441959	-0.63888	0.353	0.857	1
FYTTD1	0.000447576	-0.606929	0.088	0.429	1
ARF3	0.000457192	-0.562609	0.118	0.5	1
RAC2	0.000465748	-0.540427	0.147	0.571	1
ANP32B	0.000471212	-0.701025	0.314	0.786	1
HDAC1	0.000472678	-0.505867	0.088	0.429	1
CX3CR1	0.000484038	-0.771091	0.127	0.5	1
BASP1	0.000546089	-0.6854	0.206	0.643	1
MMP24OS	0.000558909	-0.611889	0.127	0.5	1
MSN	0.000572523	-0.894811	0.343	0.786	1
RRAS	0.000573691	-0.95391	0.039	0.286	1
CTR9	0.000596688	-0.664851	0.216	0.643	1
RPS27	0.000607787	0.715408	0.971	1	1
EIF3J	0.000609223	-0.763739	0.304	0.786	1
SCIMP	0.000644454	-0.59431	0.127	0.5	1
TCAIM	0.000661226	-0.433458	0.039	0.286	1
C1QA	0.000668181	-0.964753	0.608	0.929	1
MT-ND2	0.00068832	0.851469	1	1	1
ARHGAP21	0.000708088	-0.534293	0.127	0.5	1
GBP2	0.000708088	-0.789409	0.127	0.5	1
PRKACA	0.000709508	-0.45468	0.039	0.286	1
C17orf80	0.000709508	-0.578645	0.039	0.286	1
XPO7	0.000714797	-0.442976	0.02	0.214	1
MT-TP	0.00072097	1.52744	0.598	0.143	1
TRIM28	0.000734764	-0.411124	0.059	0.357	1
RNF213	0.000756856	-0.893555	0.304	0.714	1
DHX8	0.000761049	-0.452284	0.039	0.286	1
AP1M1	0.000761049	-0.545604	0.039	0.286	1
ZNF641	0.000780115	-0.541135	0.02	0.214	1
ZDHHC24	0.000780115	-0.550837	0.02	0.214	1
INAFM2	0.000780115	-0.586519	0.02	0.214	1
CIP2A	0.000780115	-0.77621	0.02	0.214	1
CTBP2	0.000804051	-0.422032	0.137	0.571	1
MRFAP1L1	0.000816049	-0.37615	0.039	0.286	1
ITPR1	0.000816049	-0.421716	0.039	0.286	1
LTBR	0.000816049	-0.512604	0.039	0.286	1
CAPZB	0.000827953	-0.712039	0.627	1	1
CA5B	0.000850938	-0.327252	0.02	0.214	1
DDX54	0.000850938	-0.351859	0.02	0.214	1
WBP1L	0.000850938	-0.431611	0.02	0.214	1
ACE	0.000850938	-0.511586	0.02	0.214	1
PPA1	0.000921533	-0.686912	0.108	0.429	1
AIF1	0.00092162	-0.72896	0.745	0.929	1
ILVBL	0.000927685	-0.266817	0.02	0.214	1
QSOX1	0.000927685	-0.293751	0.02	0.214	1
TMEM41A	0.000927685	-0.31134	0.02	0.214	1
WWP2	0.000927685	-0.328978	0.02	0.214	1
UBA5	0.000927685	-0.350404	0.02	0.214	1
SKI	0.000927685	-0.39443	0.02	0.214	1
RCN1	0.000927685	-0.399946	0.02	0.214	1
KIF11	0.000927685	-0.403404	0.02	0.214	1
DDX28	0.000927685	-0.827272	0.02	0.214	1
PLEC	0.000937277	-0.266498	0.039	0.286	1
RAE1	0.000937277	-0.309843	0.039	0.286	1
DNAJC5	0.000937277	-0.377063	0.039	0.286	1
AP2B1	0.000948518	-0.642675	0.167	0.571	1
COX7B	0.000979008	-0.661209	0.363	0.857	1
NMRK1	0.00100396	-0.273207	0.039	0.286	1
ACYP1	0.0010108	-0.285702	0.02	0.214	1
ZNF100	0.0010108	-0.322065	0.02	0.214	1
CENPC	0.00101659	-0.619543	0.108	0.429	1
EIF1	0.00105328	0.720941	0.941	0.929	1
KDM3B	0.00107501	-0.294796	0.039	0.286	1
IPMK	0.00110077	-0.351174	0.02	0.214	1
NCKAP1L	0.001101	-0.614505	0.265	0.714	1
RCSD1	0.00111247	-0.569412	0.225	0.643	1
PUM1	0.00111936	-0.694004	0.098	0.429	1
CCM2	0.00113404	-0.39825	0.069	0.357	1
PPP6R3	0.00115069	-0.335989	0.039	0.286	1
SLC22A8	0.00115069	-0.349052	0.039	0.286	1
C1QC	0.001196	-0.80439	0.529	1	1
STAB1	0.00122206	-0.7131	0.147	0.5	1
POM121	0.00123127	-0.313453	0.039	0.286	1
NSA2	0.00124599	-0.715044	0.225	0.643	1
PLIN2	0.00125251	1.83256	0.637	0.214	1
TNIP1	0.00125368	-0.681243	0.078	0.357	1
FRA10AC1	0.00129874	-0.486465	0.098	0.429	1
RTF1	0.00141734	-0.462097	0.304	0.786	1
SIGLEC7	0.00143214	-0.650283	0.049	0.286	1
CLTA	0.00150475	-0.606578	0.294	0.714	1
NDUFC2	0.00155637	-0.892648	0.176	0.5	1
AP1S2	0.00156419	-0.559589	0.412	0.857	1
LGALS3	0.00157471	1.579	0.775	0.357	1
HSPB11	0.00158439	-0.368587	0.069	0.357	1
HES1	0.00158644	1.70013	0.608	0.143	1
MGMT	0.00162404	-0.43169	0.049	0.286	1
GTF2H5	0.00164324	-0.488345	0.108	0.429	1
NMI	0.00164324	-0.560749	0.108	0.429	1
SAE1	0.00176782	-0.365705	0.069	0.357	1
PIGC	0.00176782	-0.389322	0.069	0.357	1
MTND1P23	0.00177154	1.7189	0.569	0.143	1
MED4	0.00178251	-0.640199	0.137	0.5	1
PARN	0.00182047	-0.558991	0.078	0.357	1
MTHFR	0.00183936	-0.424093	0.049	0.286	1
PSPC1	0.00183936	-0.442441	0.049	0.286	1
MED31	0.00183936	-0.481188	0.049	0.286	1
HIST1H1C	0.00183936	-0.490756	0.049	0.286	1
RNVU1-19	0.00183936	-0.499077	0.049	0.286	1
SQSTM1	0.00185605	1.09815	0.637	0.214	1
PQLC3	0.00186051	-0.435654	0.137	0.5	1
AGPAT3	0.00191839	-0.478473	0.078	0.357	1
UBLCP1	0.00194164	-0.308296	0.137	0.5	1
SUPT6H	0.00195659	-0.405947	0.049	0.286	1
RPAP3	0.00198137	-0.47922	0.108	0.429	1
BARD1	0.00202113	-0.664499	0.078	0.357	1
HMGB2	0.00202359	-0.875557	0.118	0.429	1
BMS1	0.00208063	-0.403565	0.049	0.286	1
TNFRSF1A	0.00208815	-0.422955	0.127	0.5	1
ARHGAP4	0.0021289	-0.383911	0.078	0.357	1
MRPL35	0.0021289	-0.64414	0.078	0.357	1
EIF4G1	0.00217338	-0.435114	0.108	0.429	1
VIRMA	0.00221186	-0.461547	0.049	0.286	1
SLC25A1	0.00221186	-0.588037	0.049	0.286	1
ACAP2	0.00226853	-0.540138	0.275	0.714	1
FAM96B	0.00230494	-0.391863	0.147	0.5	1
HTT	0.00236039	-0.528195	0.078	0.357	1
2020-09-06	0.00238232	-0.366953	0.108	0.429	1
SLC40A1	0.00253093	-0.766594	0.225	0.571	1
KCNE3	0.00261473	-0.501773	0.078	0.357	1
TCIRG1	0.00265236	-0.265238	0.049	0.286	1
TRABD	0.00265236	-0.376512	0.049	0.286	1
TAP1	0.00267163	-0.679902	0.029	0.214	1
LST1	0.00271944	-0.382316	0.373	0.857	1
ZCRB1	0.00272096	-0.504744	0.196	0.571	1
SMAD2	0.00275108	-0.357632	0.078	0.357	1
SERP1	0.00275494	-0.521856	0.294	0.714	1
IL17RA	0.00276612	-0.560649	0.118	0.429	1
UBE4A	0.00281615	-0.258311	0.049	0.286	1
TNFSF18	0.00281615	-0.42963	0.049	0.286	1
FNBP1	0.00287123	-0.560935	0.304	0.714	1
UBALD2	0.00287205	-0.420294	0.029	0.214	1
C17orf58	0.00287205	-0.438746	0.029	0.214	1
CLSPN	0.00287205	-0.88716	0.029	0.214	1
GPNMB	0.00287589	2.40539	0.588	0.286	1
LNPEP	0.00289389	-0.499596	0.078	0.357	1
SMARCA2	0.00292587	-0.389296	0.167	0.571	1
ARID5B	0.0029295	-0.528531	0.196	0.571	1
AP3D1	0.00294424	-0.501209	0.147	0.5	1
ATP5F1B	0.00298544	-0.677217	0.431	0.929	1
CLSTN1	0.00298912	-0.280651	0.049	0.286	1
HMGCR	0.00298912	-0.298178	0.049	0.286	1
FPR1	0.00302001	-0.926423	0.088	0.357	1
HDLBP	0.0030356	-0.534871	0.157	0.5	1
HS1BP3	0.0030861	-0.582713	0.029	0.214	1
CORO7	0.00316884	-0.564662	0.059	0.286	1
DAZAP1	0.00316884	-0.585783	0.059	0.286	1
CSF1R	0.00317985	-0.569318	0.314	0.714	1
MAGT1	0.00320001	-0.485249	0.078	0.357	1
FMO1	0.00324452	-0.2768	0.01	0.143	1
ZNF225	0.00324452	-0.287761	0.01	0.143	1
SH3GLB2	0.00324452	-0.291019	0.01	0.143	1
DENND6B	0.00324452	-0.291522	0.01	0.143	1
SLC7A1	0.00324452	-0.296223	0.01	0.143	1
COQ3	0.00324452	-0.311581	0.01	0.143	1
ZBTB7B	0.00324452	-0.314704	0.01	0.143	1
ELAC2	0.00324452	-0.340638	0.01	0.143	1
MRPL49	0.00324452	-0.340698	0.01	0.143	1
ASMTL	0.00324452	-0.350996	0.01	0.143	1
GPBAR1	0.00324452	-0.357044	0.01	0.143	1
CHFR	0.00324452	-0.360767	0.01	0.143	1
C17orf75	0.00324452	-0.366019	0.01	0.143	1
ZGRF1	0.00324452	-0.39168	0.01	0.143	1
AL133216.2	0.00324452	-0.485285	0.01	0.143	1
KIF15	0.00324452	-0.535063	0.01	0.143	1
CDKN3	0.00324452	-0.550666	0.01	0.143	1
ATM	0.00325302	-0.374752	0.176	0.571	1
CCT5	0.00326976	-0.525412	0.196	0.571	1
FAR1	0.00331461	-0.359158	0.029	0.214	1
HCCS	0.00331461	-0.408256	0.029	0.214	1
RNF38	0.00331461	-0.494557	0.029	0.214	1
SLF1	0.00331461	-0.52649	0.029	0.214	1
TMEM167A	0.00332119	-0.375285	0.147	0.5	1
OIP5-AS1	0.00332756	-0.558029	0.088	0.357	1
RXRA	0.0033521	-0.592767	0.059	0.286	1
NCEH1	0.00336389	-0.357111	0.078	0.357	1
DICER1	0.00341498	-0.490482	0.108	0.429	1
CAMSAP2	0.00353537	-0.312395	0.078	0.357	1
CHD4	0.00355695	-0.707346	0.275	0.643	1
LSS	0.00355843	-0.286428	0.029	0.214	1
IDH3A	0.00355843	-0.322378	0.029	0.214	1
GATC	0.00355843	-0.360092	0.029	0.214	1
MAGEF1	0.00355843	-0.408683	0.029	0.214	1
KIFAP3	0.00355843	-0.48604	0.029	0.214	1
ATXN10	0.00356778	-0.251635	0.049	0.286	1
CC2D1B	0.00358266	-0.251799	0.01	0.143	1
MBD3	0.00358266	-0.252456	0.01	0.143	1
AMDHD1	0.00358266	-0.255229	0.01	0.143	1
ZNF384	0.00358266	-0.264529	0.01	0.143	1
KDM4C	0.00358266	-0.26953	0.01	0.143	1
UBE2C	0.00358266	-0.276795	0.01	0.143	1
KCNQ3	0.00358266	-0.278895	0.01	0.143	1
LINC02303	0.00358266	-0.279741	0.01	0.143	1
SLFN13	0.00358266	-0.280411	0.01	0.143	1
PSKH1	0.00358266	-0.299892	0.01	0.143	1
GLE1	0.00358266	-0.304825	0.01	0.143	1
SLC25A19	0.00358266	-0.305081	0.01	0.143	1
PFKFB2	0.00358266	-0.352166	0.01	0.143	1
ESCO2	0.00358266	-0.376438	0.01	0.143	1
TTF2	0.00358266	-0.380833	0.01	0.143	1
ATG4A	0.00358266	-0.447489	0.01	0.143	1
MIR4435-2HG	0.00358266	-0.522983	0.01	0.143	1
SPG7	0.00358266	-0.577389	0.01	0.143	1
LILRB2	0.00367585	-1.14111	0.176	0.5	1
CCL2	0.00367585	-1.15599	0.176	0.5	1
BTF3L4	0.00374786	-0.647692	0.059	0.286	1
SLC47A1	0.00381846	-0.299098	0.029	0.214	1
AL031599.1	0.00381846	-0.331075	0.029	0.214	1
SMIM27	0.00381846	-0.334354	0.029	0.214	1
OLFML2B	0.00381846	-0.352808	0.029	0.214	1
NUBP2	0.00381846	-0.35571	0.029	0.214	1
TRIOBP	0.00381846	-0.381517	0.029	0.214	1
SASH1	0.00381846	-0.446303	0.029	0.214	1
ARHGAP27	0.00381846	-0.477665	0.029	0.214	1
KNL1	0.00381846	-0.610983	0.029	0.214	1
C22orf46	0.00381846	-0.660598	0.029	0.214	1
DMXL2	0.0038426	-0.310239	0.088	0.357	1
TLR2	0.0038426	-0.464182	0.088	0.357	1
TTF1	0.00390241	-0.354158	0.078	0.357	1
VPS54	0.00395256	-0.253513	0.01	0.143	1
TAF1C	0.00395256	-0.254448	0.01	0.143	1
BIRC5	0.00395256	-0.255605	0.01	0.143	1
CD1D	0.00395256	-0.257842	0.01	0.143	1
RIC1	0.00395256	-0.259409	0.01	0.143	1
MEST	0.00395256	-0.259774	0.01	0.143	1
SH2D3C	0.00395256	-0.261311	0.01	0.143	1
C18orf54	0.00395256	-0.270018	0.01	0.143	1
HDAC7	0.00395256	-0.277578	0.01	0.143	1
PSAT1	0.00395256	-0.282082	0.01	0.143	1
NR2C1	0.00395256	-0.338007	0.01	0.143	1
POP1	0.00395256	-0.340371	0.01	0.143	1
AC090204.1	0.00395256	-0.345027	0.01	0.143	1
HMMR	0.00395256	-0.411559	0.01	0.143	1
FAM111B	0.00395256	-0.617706	0.01	0.143	1
STAG2	0.00404096	-0.481844	0.255	0.643	1
EIF4A3	0.00405846	1.51108	0.578	0.286	1
BCAT1	0.00406046	-0.43603	0.127	0.429	1
DCTN2	0.00407144	-0.359681	0.108	0.429	1
BET1	0.00409565	-0.27082	0.029	0.214	1
PHC2	0.00409565	-0.315524	0.029	0.214	1
ANKRD13A	0.00409565	-0.35574	0.029	0.214	1
MOB3C	0.00409565	-0.36515	0.029	0.214	1
HNRNPC	0.0041379	-0.567391	0.451	0.857	1
MRPS23	0.00422513	-0.411275	0.088	0.357	1
SMC2	0.00425252	-0.253414	0.108	0.429	1
BID	0.00430973	-0.604021	0.157	0.5	1
MTX3	0.00439097	-0.269741	0.029	0.214	1
TIFA	0.00439097	-0.279686	0.029	0.214	1
TCOF1	0.00439097	-0.28218	0.029	0.214	1
MBD1	0.00439097	-0.303723	0.029	0.214	1
ZNF431	0.00442151	-0.504008	0.059	0.286	1
DIAPH1	0.00442906	-0.4326	0.088	0.357	1
MX1	0.00442906	-0.591895	0.088	0.357	1
RPL9P9	0.00447873	0.988739	0.402	0	1
USP34	0.0045228	-0.57477	0.137	0.429	1
SH3BP2	0.00466934	-0.674579	0.059	0.286	1
ACTR2	0.00467317	-0.693236	0.49	0.857	1
CYB5B	0.00470546	-0.303544	0.029	0.214	1
XPNPEP3	0.00470546	-0.336789	0.029	0.214	1
PPP1R14B	0.00486392	-0.387943	0.088	0.357	1
GFM1	0.00492969	-0.353505	0.059	0.286	1
SPDL1	0.00492969	-0.426468	0.059	0.286	1
IDI1	0.00492969	-0.461897	0.059	0.286	1
INIP	0.00492969	-0.473004	0.059	0.286	1
USP14	0.00499009	-0.526218	0.127	0.429	1
KCNMB1	0.00504021	-0.251497	0.029	0.214	1
CSE1L	0.00504021	-0.382341	0.029	0.214	1
HLA-B	0.00508508	-0.366774	0.912	1	1
DNAJC13	0.00509552	-0.414457	0.088	0.357	1
GNAI2	0.00509889	-0.468531	0.647	1	1
TNF	0.00517302	-0.997364	0.147	0.429	1
RNF41	0.00520309	-0.268551	0.059	0.286	1
GLRX3	0.00520309	-0.393398	0.059	0.286	1
PSME1	0.00523989	-0.459301	0.343	0.786	1
CFAP97	0.00541871	-0.454125	0.255	0.643	1
DENND3	0.00549013	-0.284666	0.059	0.286	1
NUP50	0.00549013	-0.463391	0.059	0.286	1
SLCO2B1	0.00568486	-0.409102	0.167	0.5	1
ITGAL	0.00579138	-0.467414	0.059	0.286	1
BRCA2	0.00579138	-0.558604	0.059	0.286	1
CREB1	0.00587871	-0.453566	0.098	0.357	1
CHCHD7	0.00597667	-0.542789	0.137	0.429	1
NUPR1	0.00604173	1.47004	0.382	0	1
FAM91A1	0.00610746	-0.265363	0.059	0.286	1
CDC37L1	0.00610746	-0.350495	0.059	0.286	1
N4BP1	0.00610746	-0.363552	0.059	0.286	1
VPS45	0.00610746	-0.384149	0.059	0.286	1
TMC6	0.00610746	-0.389764	0.059	0.286	1
COPB2	0.00610814	-0.415287	0.127	0.429	1
ETNK1	0.00612489	-0.312617	0.088	0.357	1
PARP9	0.00621565	-0.425595	0.137	0.429	1
FAM105A	0.00635713	-0.311664	0.127	0.429	1
RNMT	0.00635713	-0.691141	0.127	0.429	1
NUCKS1	0.00640884	-0.491561	0.637	0.857	1
FDPS	0.00642236	-0.542813	0.098	0.357	1
SH3GLB1	0.0064695	-0.399093	0.363	0.714	1
C1orf54	0.00652192	-0.783171	0.147	0.429	1
PSMA1	0.0065669	-0.631834	0.196	0.5	1
DNAJB11	0.00670678	-0.335417	0.088	0.357	1
MIR1244-2	0.00678662	-0.271088	0.059	0.286	1
C6orf89	0.00678662	-0.283993	0.059	0.286	1
NSMCE3	0.00678662	-0.304707	0.059	0.286	1
CCNY	0.00681877	-0.409736	0.167	0.5	1
SMC4	0.00696688	-0.884047	0.206	0.5	1
NHP2	0.00701083	-0.497672	0.098	0.357	1
PLTP	0.00703736	-1.174	0.147	0.429	1
LARP7	0.00704701	-0.649641	0.461	0.857	1
MUM1	0.00722903	-0.608364	0.108	0.357	1
YTHDF2	0.00722903	-0.748158	0.108	0.357	1
RAN	0.00728397	-0.532737	0.314	0.643	1
DCAF5	0.00732286	-0.385712	0.098	0.357	1
GIMAP4	0.00732782	-0.52003	0.186	0.5	1
SEC14L1	0.00734292	-0.416158	0.216	0.571	1
RABIF	0.00736851	-0.414109	0.039	0.214	1
PRPF4B	0.00743695	-0.448705	0.245	0.643	1
LBR	0.00758908	-0.668766	0.147	0.429	1
FADS2	0.00764729	-0.445035	0.098	0.357	1
VSIR	0.00764729	-0.507252	0.098	0.357	1
RNF145	0.00767052	-0.721975	0.265	0.571	1
C1orf43	0.00774132	0.931715	0.52	0.143	1
APOC1	0.00779965	1.9343	0.637	0.357	1
STX16	0.00783311	-0.762303	0.039	0.214	1
CENPE	0.00783311	-0.842825	0.039	0.214	1
MYOF	0.00786802	-0.461166	0.167	0.5	1
CD9	0.00806145	1.28991	0.5	0.143	1
ARID4A	0.00824251	-0.739116	0.206	0.5	1
RASSF4	0.00824559	-0.498603	0.441	0.857	1
UXT	0.00832085	-0.461185	0.225	0.571	1
TBC1D12	0.0083238	-0.405723	0.039	0.214	1
PTER	0.0083238	-0.501059	0.039	0.214	1
UBB	0.00838617	0.74937	0.931	0.929	1
NAPSB	0.00844505	-0.387898	0.167	0.5	1
CSNK1D	0.00846875	-0.486503	0.157	0.429	1
CBX6	0.00884179	-0.373658	0.039	0.214	1
UGT2B7	0.00891182	-0.531347	0.108	0.357	1
NDUFV3	0.00892745	-0.471784	0.216	0.571	1
EIF3D	0.00902528	-0.251842	0.157	0.5	1
TRAPPC1	0.00921938	-0.525625	0.216	0.571	1
PET100	0.0093884	-0.380699	0.039	0.214	1
STRN	0.0093884	-0.381389	0.039	0.214	1
MAP1S	0.0093884	-0.441139	0.039	0.214	1
RAB31	0.00939119	-0.480194	0.431	0.857	1
NT5C	0.00947063	-0.408357	0.098	0.357	1
FLNA	0.00947163	-0.379165	0.137	0.429	1
PRKCB	0.00952424	-0.585651	0.069	0.286	1
CAP1	0.00979592	-0.56418	0.48	0.929	1
SLC8A1	0.00985969	-0.299065	0.186	0.571	1
IPO8	0.00996496	-0.333371	0.039	0.214	1
TGFBR2	0.00999601	-0.413169	0.069	0.286	1
SSPN	0.00999601	-0.478127	0.069	0.286	1
RAB5C	0.0100682	-0.393124	0.225	0.571	1
CTNNB1	0.0100819	-0.605085	0.108	0.357	1
CALR	0.0101674	-0.713574	0.451	0.714	1
TPM3	0.0102306	-0.591854	0.686	0.929	1
POLE4	0.0104885	-0.331605	0.069	0.286	1
DCTN4	0.0104885	-0.390004	0.069	0.286	1
MCM5	0.0104885	-0.424339	0.069	0.286	1
PDHB	0.0104885	-0.486847	0.069	0.286	1
CMSS1	0.0105728	-0.2635	0.039	0.214	1
ACSM2B	0.0105728	-0.312065	0.039	0.214	1
CDK19	0.0105728	-0.389247	0.039	0.214	1
PSMD1	0.0105909	-0.403118	0.137	0.429	1
DKC1	0.0105909	-0.467324	0.137	0.429	1
CBX1	0.0106532	-0.394239	0.186	0.5	1
NUB1	0.0108847	-0.419673	0.196	0.5	1
PDAP1	0.0108947	-0.550119	0.157	0.429	1
MBNL1	0.0109073	-0.5038	0.412	0.857	1
PAPOLG	0.0110024	-0.321655	0.069	0.286	1
RNF115	0.0110024	-0.471104	0.069	0.286	1
DYNC1H1	0.0110589	-0.438834	0.225	0.571	1
HLA-DMB	0.0110864	0.75019	0.686	0.429	1
RPL23A	0.0111147	0.742969	0.755	0.643	1
SAMHD1	0.0111972	-0.49824	0.51	0.857	1
SH3BGRL3	0.0111986	-0.518275	0.667	1	1
BRCA1	0.0112135	-0.257476	0.039	0.214	1
RBM10	0.0112135	-0.299089	0.039	0.214	1
RCOR3	0.0112135	-0.302322	0.039	0.214	1
MVP	0.0112135	-0.417711	0.039	0.214	1
PNPLA6	0.0112135	-0.561097	0.039	0.214	1
KLF3	0.0113748	-0.593313	0.147	0.429	1
WDR82	0.0114009	-0.430088	0.137	0.429	1
NSRP1	0.0114834	-0.448611	0.176	0.5	1
MPLKIP	0.0115386	-0.263482	0.069	0.286	1
CMTM6	0.0116088	-0.711267	0.255	0.571	1
USP15	0.011625	-0.561291	0.235	0.571	1
SUZ12	0.0117908	-0.561366	0.147	0.429	1
PICALM	0.0118098	-0.414707	0.206	0.5	1
UBXN11	0.0118884	-0.268691	0.039	0.214	1
GCLC	0.0118884	-0.271395	0.039	0.214	1
ZMAT3	0.0118884	-0.273098	0.039	0.214	1
BAG6	0.0118884	-0.277254	0.039	0.214	1
DNM2	0.0118884	-0.311284	0.039	0.214	1
HBS1L	0.0118884	-0.386943	0.039	0.214	1
MIOX	0.0118884	-0.532553	0.039	0.214	1
RPL21	0.0119744	0.56649	0.951	1	1
CAPZA2	0.0119856	-0.515707	0.235	0.571	1
PYGL	0.0120979	-0.345977	0.069	0.286	1
TIMP1	0.0122396	-1.01376	0.284	0.571	1
PDIA6	0.0122913	-0.419127	0.363	0.786	1
MTND4P12	0.0123235	1.55997	0.333	0	1
CRYAB	0.0125138	-0.431807	0.225	0.571	1
SLFN5	0.012599	-0.283009	0.039	0.214	1
MARVELD1	0.012599	-0.364391	0.039	0.214	1
LUC7L2	0.0126804	-0.341158	0.069	0.286	1
TIMM10	0.0126811	-0.292712	0.069	0.286	1
CCT3	0.0126925	-0.422318	0.176	0.5	1
NUP62	0.0127192	-0.293483	0.137	0.429	1
TRIP12	0.0127192	-0.473319	0.137	0.429	1
PRMT1	0.0128398	-0.441879	0.108	0.357	1
NPL	0.0129875	-0.509085	0.157	0.429	1
GIMAP7	0.0129875	-0.698495	0.157	0.429	1
VCP	0.0131207	-0.415365	0.147	0.429	1
PHACTR2	0.0132228	-0.388851	0.196	0.5	1
RERE	0.0132378	-0.725871	0.078	0.286	1
POMP	0.0132639	-0.404845	0.422	0.786	1
SIRT1	0.013289	-0.320514	0.069	0.286	1
NOMO1	0.0133471	-0.261808	0.039	0.214	1
AGGF1	0.0133471	-0.269195	0.039	0.214	1
NMT1	0.0134464	-0.530361	0.157	0.429	1
LAP3	0.0135292	-0.432169	0.235	0.571	1
UBC	0.013775	-0.451979	0.775	1	1
ZCCHC10	0.0138973	-0.360508	0.108	0.357	1
IL6R	0.0138973	-0.390516	0.108	0.357	1
GLUD1	0.0138973	-0.441503	0.108	0.357	1
TIMM44	0.0139225	-0.300069	0.069	0.286	1
CPPED1	0.0139226	-0.630779	0.118	0.357	1
CHMP2A	0.0140129	-0.755354	0.186	0.429	1
EFHD2	0.0140795	-0.533977	0.147	0.429	1
ALDH1A1	0.0141308	1.06614	0.324	0	1
MEF2A	0.014261	-0.479421	0.402	0.714	1
MS4A6A	0.014343	-0.505038	0.529	1	1
CEP295	0.0144538	-0.314309	0.108	0.357	1
WDR1	0.0145505	-0.463616	0.196	0.5	1
GNG2	0.0145825	-0.308078	0.069	0.286	1
SLA	0.0147385	-0.518933	0.206	0.5	1
BOD1L1	0.0147774	-0.442014	0.186	0.5	1
TUBB	0.0147978	-0.946229	0.382	0.643	1
NDUFA12	0.0151205	-0.426527	0.265	0.643	1
CAMK1	0.015132	-0.387921	0.078	0.286	1
TTC17	0.015132	-0.526108	0.078	0.286	1
LEO1	0.015132	-0.601608	0.078	0.286	1
JUNB	0.015523	1.04381	0.627	0.429	1
MACC1	0.0158145	-0.429536	0.078	0.286	1
ROGDI	0.0158829	-0.353455	0.049	0.214	1
ACTG1	0.0159625	-0.402983	0.794	1	1
TGFBI	0.015976	-0.616375	0.343	0.643	1
ACMSD	0.0164188	-0.287289	0.02	0.143	1
MAP3K12	0.0164188	-0.303847	0.02	0.143	1
RFTN1	0.0164188	-0.315715	0.02	0.143	1
PCBD2	0.0164188	-0.325063	0.02	0.143	1
AP3M1	0.0164188	-0.364775	0.02	0.143	1
AC015912.3	0.0164188	-0.398303	0.02	0.143	1
CYTH2	0.0164188	-0.40012	0.02	0.143	1
ASPM	0.0164188	-1.18747	0.02	0.143	1
TOP2A	0.0164188	-1.3115	0.02	0.143	1
H3F3A	0.0165126	-0.451876	0.157	0.429	1
SUN2	0.0165239	-0.384951	0.078	0.286	1
STOM	0.0165239	-0.625984	0.078	0.286	1
MZT2B	0.0168123	-0.465873	0.216	0.5	1
GPATCH11	0.0170793	-0.478767	0.157	0.429	1
HIST1H1E	0.017261	-0.437754	0.078	0.286	1
SEC23B	0.0174735	-0.278107	0.118	0.357	1
LMAN2	0.0174735	-0.429459	0.118	0.357	1
TPRKB	0.0174735	-0.43129	0.118	0.357	1
MRPL51	0.0174735	-0.519023	0.118	0.357	1
MPDU1	0.0176438	-0.409821	0.049	0.214	1
C19orf66	0.0176438	-0.411046	0.049	0.214	1
CENPF	0.0176438	-1.66738	0.049	0.214	1
MAD1L1	0.0176605	-0.29646	0.02	0.143	1
KIAA1468	0.0176605	-0.309966	0.02	0.143	1
ULK2	0.0176605	-0.326043	0.02	0.143	1
VPS9D1	0.0176605	-0.384913	0.02	0.143	1
FKBP14	0.0176605	-0.421659	0.02	0.143	1
FOXJ2	0.0176605	-0.427615	0.02	0.143	1
CHMP1A	0.0176605	-0.44574	0.02	0.143	1
LYVE1	0.0176605	-0.607552	0.02	0.143	1
RHOC	0.0176627	-0.537301	0.157	0.429	1
CORO1C	0.0181387	-0.314258	0.137	0.429	1
DOCK4	0.0183134	-0.292589	0.069	0.286	1
APEX1	0.0184466	-0.359764	0.186	0.5	1
HBEGF	0.0184806	0.802425	0.304	0	1
CFL1	0.0186	-0.482355	0.608	0.929	1
IFT20	0.0188221	-0.390006	0.118	0.357	1
RC3H2	0.0189837	-0.254728	0.02	0.143	1
GNA15	0.0189837	-0.25657	0.02	0.143	1
DHRS4-AS1	0.0189837	-0.259064	0.02	0.143	1
MTERF4	0.0189837	-0.259298	0.02	0.143	1
PPM1B	0.0189837	-0.259302	0.02	0.143	1
NCK2	0.0189837	-0.260048	0.02	0.143	1
HMG20A	0.0189837	-0.271028	0.02	0.143	1
UBXN2B	0.0189837	-0.272093	0.02	0.143	1
REC8	0.0189837	-0.284032	0.02	0.143	1
ZNF799	0.0189837	-0.285919	0.02	0.143	1
TAMM41	0.0189837	-0.290628	0.02	0.143	1
GCNT1	0.0189837	-0.30053	0.02	0.143	1
H2AFY2	0.0189837	-0.302219	0.02	0.143	1
DESI1	0.0189837	-0.309753	0.02	0.143	1
SLC38A10	0.0189837	-0.31923	0.02	0.143	1
PAOX	0.0189837	-0.325953	0.02	0.143	1
COPZ2	0.0189837	-0.33414	0.02	0.143	1
UBR1	0.0189837	-0.349352	0.02	0.143	1
NUP205	0.0189837	-0.374697	0.02	0.143	1
TMEM2	0.0189837	-0.382736	0.02	0.143	1
SPATA6	0.0189837	-0.383282	0.02	0.143	1
GPALPP1	0.0189837	-0.393015	0.02	0.143	1
KIF18A	0.0189837	-0.43119	0.02	0.143	1
MAEA	0.0189837	-0.514909	0.02	0.143	1
TXN2	0.0193294	-0.663474	0.196	0.429	1
SPECC1	0.0193306	-0.642693	0.186	0.429	1
TMSB4X	0.0195523	-0.371105	0.99	1	1
PLXNB2	0.0196483	-0.309909	0.078	0.286	1
STUB1	0.0196483	-0.339519	0.078	0.286	1
ZC3H15	0.0197371	-0.308143	0.343	0.714	1
FDFT1	0.0198658	-0.506753	0.088	0.286	1
AKR1A1	0.0200723	-0.375099	0.382	0.714	1
SUB1	0.0201833	-0.338826	0.324	0.714	1
BFAR	0.0202609	-0.507679	0.118	0.357	1
SFXN4	0.0203928	-0.256952	0.02	0.143	1
LRRC47	0.0203928	-0.258915	0.02	0.143	1
NUS1	0.0203928	-0.259251	0.02	0.143	1
CENPK	0.0203928	-0.293114	0.02	0.143	1
ST7	0.0203928	-0.354766	0.02	0.143	1
UNC5B	0.0203928	-0.356569	0.02	0.143	1
GBP4	0.0204204	-0.412817	0.108	0.357	1
MRPS25	0.0205058	-0.298928	0.078	0.286	1
SCIN	0.0205058	-0.364896	0.078	0.286	1
CASP4	0.0205844	-0.373705	0.245	0.571	1
PNKP	0.0206058	-0.313956	0.049	0.214	1
SLC4A4	0.0206058	-0.320161	0.049	0.214	1
SELENON	0.0206058	-0.359617	0.049	0.214	1
TLR1	0.0207017	-0.43415	0.127	0.357	1
COX7C	0.0211066	-0.443789	0.706	0.929	1
ALDOB	0.0211929	-0.772945	0.176	0.429	1
ENY2	0.0213916	-0.359964	0.265	0.571	1
STAT6	0.0213957	-0.388576	0.078	0.286	1
CD14	0.0214599	-0.827544	0.49	0.786	1
TCF7L2	0.0215661	-0.494302	0.088	0.286	1
STARD4	0.0216852	-0.304861	0.049	0.214	1
AGTRAP	0.0216852	-0.319403	0.049	0.214	1
FGD2	0.0216852	-0.408553	0.049	0.214	1
MIGA1	0.0216852	-0.485241	0.049	0.214	1
CD33	0.0216852	-0.485345	0.049	0.214	1
NUSAP1	0.0216852	-0.637822	0.049	0.214	1
PISD	0.0218923	-0.302323	0.02	0.143	1
CELF2	0.0218986	-0.302818	0.294	0.643	1
TXN	0.0221925	1.11218	0.51	0.286	1
CAMK2D	0.0222262	-0.464753	0.127	0.357	1
LRMP	0.0222262	-0.479688	0.127	0.357	1
MTATP6P1	0.0223727	0.521222	0.99	1	1
TYMP	0.02256	-0.471432	0.373	0.714	1
MAP3K2	0.0225676	-0.289549	0.206	0.5	1
ACIN1	0.0227969	-0.425037	0.314	0.643	1
DOCK5	0.0228134	-0.336445	0.049	0.214	1
FBXW7	0.0228134	-0.371421	0.049	0.214	1
PYM1	0.0228134	-0.371943	0.049	0.214	1
NBEAL1	0.0228134	-0.388639	0.049	0.214	1
LYN	0.0228323	-0.377562	0.402	0.786	1
SLTM	0.023267	-0.354135	0.353	0.714	1
METTL7A	0.0233055	-0.775939	0.186	0.429	1
CPSF2	0.0237531	-0.38518	0.157	0.429	1
NCOR2	0.0238473	-0.370204	0.127	0.357	1
STX8	0.0239923	-0.276274	0.049	0.214	1
MOGS	0.0239923	-0.301298	0.049	0.214	1
SELPLG	0.0239923	-0.306898	0.049	0.214	1
AKNA	0.0239923	-0.364344	0.049	0.214	1
RRP1B	0.0239923	-0.38828	0.049	0.214	1
PDCD6	0.0242848	-0.320483	0.118	0.357	1
QSER1	0.0243538	-0.555422	0.088	0.286	1
BNIP2	0.024531	-0.349341	0.157	0.429	1
TIMMDC1	0.0246956	-0.461678	0.127	0.357	1
YWHAB	0.0248923	-0.384497	0.765	1	1
TNFAIP8	0.0251679	-0.340176	0.118	0.357	1
GIN1	0.0252237	-0.273703	0.049	0.214	1
SEC61A1	0.0252237	-0.274524	0.049	0.214	1
KDM4A	0.0252237	-0.277539	0.049	0.214	1
NBPF12	0.0252237	-0.314485	0.049	0.214	1
GCLM	0.0252237	-0.317133	0.049	0.214	1
LILRA5	0.0252237	-0.318456	0.049	0.214	1
ARID5A	0.0252237	-0.365069	0.049	0.214	1
R3HDM1	0.0252237	-0.368781	0.049	0.214	1
ETV6	0.0253	-0.259065	0.078	0.286	1
RPN1	0.0253836	-0.332543	0.206	0.5	1
POLR2G	0.02557	-0.299443	0.127	0.357	1
ACBD3	0.0256368	0.747436	0.373	0.071	1
RPL19	0.02587	-0.387866	0.833	1	1
METAP2	0.0258837	-0.433917	0.265	0.571	1
TREM2	0.0260681	0.844685	0.549	0.214	1
AP3S1	0.0263813	-0.393155	0.088	0.286	1
DNAJB1	0.0264988	0.617395	0.814	0.571	1
MCM6	0.0265094	-0.255812	0.049	0.214	1
UBE2D4	0.0265094	-0.269628	0.049	0.214	1
RABGAP1	0.0265094	-0.29325	0.049	0.214	1
SEC23A	0.0265094	-0.410622	0.049	0.214	1
CDK6	0.0266989	-0.403689	0.137	0.357	1
SMC1A	0.0267335	-0.274439	0.147	0.429	1
MIS18BP1	0.0267912	-0.40041	0.284	0.643	1
EMC4	0.0268022	-0.494963	0.235	0.5	1
PPIG	0.0269999	-0.587668	0.304	0.571	1
ARL2BP	0.0270177	-0.30421	0.118	0.357	1
SMC5	0.0271477	-0.322416	0.167	0.429	1
KLHL9	0.0274486	-0.321028	0.088	0.286	1
FKBP8	0.0279859	-0.326465	0.118	0.357	1
GNPDA1	0.0279859	-0.328361	0.118	0.357	1
IDH1	0.028553	-0.359125	0.088	0.286	1
C1orf131	0.028553	-0.469768	0.088	0.286	1
HAMP	0.028553	-1.04125	0.088	0.286	1
MNDA	0.0286878	-0.616834	0.578	0.857	1
DDX46	0.0288001	-0.304746	0.265	0.571	1
CDK11B	0.0288227	-0.374387	0.186	0.429	1
UTP3	0.0289838	-0.266999	0.118	0.357	1
EIF5	0.0291682	0.741597	0.706	0.571	1
PA2G4	0.0293323	-0.417435	0.294	0.571	1
ACP5	0.0294597	1.48811	0.353	0.071	1
PAIP2	0.0297902	-0.325856	0.167	0.429	1
2020-03-06	0.0300122	-0.31745	0.118	0.357	1
RPS24	0.0301459	-0.409801	0.843	1	1
RAC1	0.0301802	-0.565208	0.765	0.929	1
TMEM147	0.0302748	-0.491586	0.255	0.5	1
NDUFA8	0.030437	-0.384275	0.098	0.286	1
ITGB2	0.0306367	-0.459774	0.559	0.929	1
ADI1	0.0307059	-0.395045	0.176	0.429	1
FSCN1	0.0307117	-0.266041	0.049	0.214	1
DIRC2	0.0307117	-0.279904	0.049	0.214	1
NCBP2	0.0308769	-0.328331	0.088	0.286	1
C15orf48	0.0309847	1.04835	0.265	0	1
PLA2G7	0.0309847	1.04051	0.265	0	1
CYSTM1	0.0310272	-0.442185	0.216	0.5	1
PIK3AP1	0.0315443	-0.425444	0.137	0.357	1
STK38L	0.0316044	-0.418469	0.098	0.286	1
UTP23	0.0316044	-0.619605	0.098	0.286	1
SRGN	0.0320913	-0.344023	0.833	1	1
SAP30BP	0.0320985	-0.311993	0.088	0.286	1
GRHPR	0.0320985	-0.349472	0.088	0.286	1
CORO1A	0.0324545	-0.384123	0.186	0.429	1
PSMA2	0.0324736	-0.414306	0.127	0.357	1
FOXP1	0.0326509	-0.444635	0.167	0.429	1
RPS26	0.0327186	0.579818	0.716	0.571	1
ANKRD12	0.0327672	-0.587559	0.471	0.786	1
KTN1	0.033277	-0.332264	0.676	0.929	1
TBC1D4	0.0333006	-0.364688	0.059	0.214	1
VRK2	0.0333614	-0.280722	0.088	0.286	1
SLC35B1	0.0333614	-0.328347	0.088	0.286	1
CARD8	0.0333614	-0.369186	0.088	0.286	1
THEMIS2	0.0335798	-0.298105	0.127	0.357	1
TMEM173	0.0336553	-0.347714	0.167	0.429	1
EGR2	0.0336838	-0.865039	0.137	0.357	1
BAZ1B	0.0337037	-0.372247	0.265	0.571	1
QKI	0.0341754	-0.436205	0.343	0.643	1
RPS14	0.0344993	0.559918	0.853	0.786	1
MAP1LC3B	0.0345921	0.756248	0.5	0.286	1
SUCLG1	0.0346368	-0.317186	0.363	0.714	1
VPS53	0.0346665	-0.392941	0.088	0.286	1
EPSTI1	0.0346861	-0.350288	0.167	0.429	1
PSMB7	0.034718	-0.258286	0.127	0.357	1
CCL4L2	0.0349317	-1.39593	0.598	0.714	1
UBE2R2	0.0351223	0.694182	0.255	0	1
UBE2V2	0.0353397	-0.470983	0.098	0.286	1
AKAP13	0.0353935	-0.471618	0.275	0.571	1
COTL1	0.0355533	-0.352616	0.539	0.857	1
CD83	0.0356923	0.512184	0.637	0.429	1
MSL3	0.0357437	-0.344172	0.167	0.429	1
EXOC1	0.0359462	-0.411758	0.137	0.357	1
RUFY3	0.0360149	-0.260227	0.088	0.286	1
LGALS1	0.0363892	0.779887	0.725	0.5	1
CENPB	0.0364474	-0.357398	0.059	0.214	1
CKAP4	0.0364474	-0.639607	0.059	0.214	1
CAMK1D	0.0366658	-0.390486	0.098	0.286	1
PPP2R3C	0.0366658	-0.423078	0.098	0.286	1
WAPL	0.0367313	-0.27951	0.206	0.5	1
CBX3	0.0367899	-0.520262	0.549	0.857	1
SH3KBP1	0.037216	-0.461071	0.51	0.857	1
IDH2	0.0374079	-0.348483	0.088	0.286	1
PNN	0.037413	-0.254861	0.255	0.571	1
MLEC	0.037764	-0.331981	0.294	0.571	1
SLC7A7	0.0377958	-0.448844	0.176	0.429	1
PTPN11	0.0378229	-0.310149	0.245	0.5	1
KPNA2	0.0380341	-0.422667	0.098	0.286	1
SLC35E1	0.0380341	-0.43916	0.098	0.286	1
CRYBG3	0.0381136	-0.333863	0.059	0.214	1
ACAA1	0.0383324	-0.363031	0.127	0.357	1
PAG1	0.0388464	-0.347706	0.088	0.286	1
TMEM14C	0.0388832	0.797752	0.324	0.071	1
TMF1	0.0389144	-0.388923	0.176	0.429	1
ITSN1	0.0393497	-0.557148	0.196	0.429	1
JAML	0.0397555	0.625869	0.245	0	1
MGME1	0.0398441	-0.308049	0.059	0.214	1
DHRS3	0.0398441	-0.335073	0.059	0.214	1
OAS2	0.0398441	-0.415383	0.059	0.214	1
LSP1	0.0398919	-0.261466	0.206	0.5	1
RGS2	0.0400481	1.0833	0.48	0.214	1
PRPF6	0.040426	-0.262743	0.245	0.571	1
WDFY4	0.0404716	-0.448983	0.196	0.429	1
PYURF	0.0405779	-0.289183	0.225	0.5	1
SAMSN1	0.0406278	-0.463861	0.147	0.357	1
MRPS7	0.0409011	-0.320447	0.098	0.286	1
PSMB9	0.0409948	-0.314738	0.206	0.5	1
TNFSF13B	0.0411716	-0.329912	0.275	0.571	1
DST	0.041422	-0.430916	0.333	0.643	1
MYNN	0.0416409	-0.295399	0.059	0.214	1
CARS2	0.0416409	-0.308051	0.059	0.214	1
MIB1	0.0416409	-0.310335	0.059	0.214	1
LPIN1	0.0416409	-0.533199	0.059	0.214	1
CDC27	0.041908	-0.349291	0.147	0.357	1
ATP5IF1	0.0420929	-0.374167	0.382	0.714	1
LGALS9	0.0422164	-0.562167	0.206	0.429	1
TUBA1C	0.0423398	-0.450561	0.304	0.571	1
SPG21	0.042402	-0.524523	0.098	0.286	1
TMED9	0.0424396	-0.381766	0.176	0.429	1
DYNLL1	0.0428793	0.699405	0.529	0.286	1
RAB10	0.0430759	-0.341073	0.216	0.5	1
RBM3	0.043178	-0.407134	0.392	0.714	1
ANXA11	0.04339	-0.452764	0.206	0.429	1
GALC	0.0435058	-0.252724	0.059	0.214	1
FERMT3	0.0435058	-0.293487	0.059	0.214	1
PRR11	0.0435058	-0.345006	0.059	0.214	1
GLA	0.0439867	0.915523	0.373	0.143	1
PMFBP1	0.0443216	-0.280627	0.029	0.143	1
ACBD6	0.0443216	-0.288831	0.029	0.143	1
SGO2	0.0443216	-0.338281	0.029	0.143	1
GPR84	0.0443216	-0.36653	0.029	0.143	1
MCM4	0.0443216	-0.470843	0.029	0.143	1
ZNF397	0.0443216	-0.604613	0.029	0.143	1
MYL6	0.0445446	-0.413242	0.627	0.929	1
ZNF207	0.0445711	-0.438424	0.147	0.357	1
ATP5MPL	0.0447822	-0.463665	0.51	0.929	1
SUPT4H1	0.0449374	0.606268	0.235	0	1
RASGEF1B	0.0449382	0.792498	0.235	0	1
HEXIM1	0.0449382	0.641878	0.235	0	1
ATRAID	0.0449382	0.596806	0.235	0	1
RAB5B	0.0454407	-0.258755	0.059	0.214	1
TPMT	0.0454407	-0.267679	0.059	0.214	1
C1GALT1	0.0454407	-0.271575	0.059	0.214	1
SSBP4	0.0454407	-0.386843	0.059	0.214	1
ATP5MF	0.0455524	-0.295346	0.461	0.857	1
AC020656.1	0.0461045	1.03149	0.392	0.143	1
RGS1	0.0468552	1.29231	0.696	0.643	1
NET1	0.0469277	-0.257864	0.029	0.143	1
DPP4	0.0469277	-0.329318	0.029	0.143	1
HIP1	0.0469277	-0.329626	0.029	0.143	1
FZD1	0.0469277	-0.333322	0.029	0.143	1
VCPIP1	0.0469277	-0.424509	0.029	0.143	1
RB1	0.0470774	-0.422105	0.206	0.429	1
TMPO	0.0470802	-0.259376	0.186	0.429	1
TSPYL1	0.047187	-0.323192	0.098	0.286	1
NME1	0.047187	-0.343843	0.098	0.286	1
CTSD	0.0472121	1.0127	0.696	0.5	1
BIN1	0.0472457	-0.738184	0.108	0.286	1
PLOD3	0.0474477	-0.258344	0.059	0.214	1
RARRES2	0.0474477	-0.277267	0.059	0.214	1
MRPL36	0.0474477	-0.280185	0.059	0.214	1
FCGR1CP	0.0474477	-0.391637	0.059	0.214	1
CLTB	0.0474477	-0.482569	0.059	0.214	1
MCL1	0.0482855	0.755042	0.314	0.071	1
TMED3	0.0488797	-0.286154	0.098	0.286	1
RPS8	0.0496103	-0.35876	0.873	1	1
ATG4B	0.0496615	-0.251647	0.029	0.143	1
MIR1282	0.0496615	-0.256855	0.029	0.143	1
CCDC159	0.0496615	-0.273526	0.029	0.143	1
PRIM1	0.0496615	-0.274913	0.029	0.143	1
HMGCS1	0.0496615	-0.286583	0.029	0.143	1
TBC1D8	0.0496615	-0.292836	0.029	0.143	1
RNF187	0.0496615	-0.294038	0.029	0.143	1
MRVI1	0.0496615	-0.296756	0.029	0.143	1
ZNF804A	0.0496615	-0.318126	0.029	0.143	1
NAE1	0.0496615	-0.367663	0.029	0.143	1
SRSF10	0.0500263	-0.439669	0.225	0.5	1
VASP	0.0503269	-0.491499	0.147	0.357	1
RPN2	0.0503305	-0.586569	0.392	0.643	1
MTCO1P23	0.05073	0.622898	0.225	0	1
RAD23A	0.05073	0.614622	0.225	0	1
CCDC43	0.0508341	-0.296093	0.137	0.357	1
HIST1H1D	0.0511958	-0.826064	0.069	0.214	1
ITGAX	0.0514576	-0.410658	0.245	0.5	1
FXR1	0.0514576	-0.547282	0.245	0.5	1
HNRNPL	0.0516857	-0.306714	0.059	0.214	1
GSN	0.0521829	-0.268933	0.284	0.571	1
ATP5PD	0.052186	0.577264	0.52	0.286	1
PPDPF	0.0522702	0.795575	0.431	0.214	1
MRPS35	0.0524009	-0.399528	0.206	0.429	1
LRRC8C	0.0525277	-0.255084	0.029	0.143	1
GALNT6	0.0525277	-0.255297	0.029	0.143	1
RN7SL138P	0.0525277	-0.256729	0.029	0.143	1
NIPAL3	0.0525277	-0.27116	0.029	0.143	1
ACOT7	0.0525277	-0.320843	0.029	0.143	1
SGO1	0.0525277	-0.350614	0.029	0.143	1
ISCA2	0.0525277	-0.351595	0.029	0.143	1
EPC2	0.0525277	-0.36739	0.029	0.143	1
PKD1	0.0525277	-0.368835	0.029	0.143	1
ANKRD22	0.0525277	-0.371614	0.029	0.143	1
KMT5A	0.0525277	-0.531192	0.029	0.143	1
DDIT3	0.0536571	0.842458	0.382	0.143	1
RBM5	0.0540325	-0.25291	0.137	0.357	1
SHPRH	0.0541107	-0.502348	0.108	0.286	1
GRK2	0.0542663	-0.255601	0.098	0.286	1
NSD1	0.0542663	-0.333862	0.098	0.286	1
GAPDH	0.054533	-0.493982	0.833	1	1
CXCR4	0.055344	0.944142	0.529	0.286	1
CUL3	0.0554904	-0.363816	0.069	0.214	1
WHAMM	0.0554904	-0.369302	0.069	0.214	1
MRPL42	0.0554904	-0.393869	0.069	0.214	1
LIMCH1	0.0555309	-0.250305	0.029	0.143	1
CDC25B	0.0555309	-0.258977	0.029	0.143	1
ZNF677	0.0555309	-0.262639	0.029	0.143	1
POLD2	0.0555309	-0.26669	0.029	0.143	1
IMPAD1	0.0555309	-0.273962	0.029	0.143	1
GPR183	0.055609	0.44915	0.471	0.143	1
TES	0.0556936	-0.314809	0.137	0.357	1
FBP1	0.0560083	1.34813	0.314	0.071	1
GSK3B	0.0561684	-0.254428	0.098	0.286	1
RPS7	0.0564255	-0.279895	0.676	1	1
RRBP1	0.0566769	-0.414584	0.333	0.571	1
YTHDC2	0.056693	-0.360642	0.147	0.357	1
ATF6	0.0568204	-0.308927	0.225	0.5	1
ZNF24	0.0571971	0.641671	0.216	0	1
XIST	0.0571971	0.613264	0.216	0	1
FCGR2C	0.0571971	0.596847	0.216	0	1
YPEL5	0.0571971	0.529275	0.216	0	1
BRWD1	0.057844	-0.287874	0.108	0.286	1
PDS5A	0.0581257	-0.25676	0.098	0.286	1
ARPC3	0.0596486	-0.253441	0.598	0.857	1
CAND1	0.0597895	-0.277156	0.108	0.286	1
LILRB3	0.0597895	-0.404716	0.108	0.286	1
DUSP6	0.0599707	-0.314883	0.255	0.571	1
KPNA3	0.0601192	-0.283038	0.147	0.357	1
ZFP36L1	0.0604208	-0.285415	0.667	0.929	1
SH2B3	0.0610401	-0.45939	0.118	0.286	1
GNB1	0.061315	-0.450367	0.284	0.5	1
CIRBP	0.0614493	0.567044	0.412	0.143	1
CWC15	0.0614493	-0.431557	0.353	0.571	1
PRR13	0.0614742	-0.2619	0.314	0.643	1
DUSP1	0.0615294	0.654187	0.755	0.571	1
INSIG1	0.0617701	-0.287324	0.353	0.643	1
PLEKHB2	0.0619112	-0.27458	0.225	0.429	1
PLIN3	0.0619112	-0.376307	0.225	0.429	1
EIF5B	0.0619415	-0.276775	0.5	0.857	1
ZNF331	0.0620164	1.26926	0.294	0.071	1
BPTF	0.0621266	-0.323714	0.343	0.643	1
FAM198B	0.062492	-0.34529	0.069	0.214	1
SRM	0.062492	-0.377607	0.069	0.214	1
LDLR	0.062492	-0.427244	0.069	0.214	1
PCMTD1	0.0627612	0.43613	0.343	0.071	1
SORL1	0.0629259	-0.412472	0.206	0.429	1
GDE1	0.0638434	-0.342436	0.108	0.286	1
KIAA1143	0.0640893	-0.2635	0.196	0.429	1
CADM1	0.0644129	0.645192	0.206	0	1
ECH1	0.0644129	0.628863	0.206	0	1
BRD7	0.0644129	0.470462	0.206	0	1
LSM3	0.0644129	-0.356845	0.157	0.357	1
ATF3	0.0648339	0.922469	0.618	0.429	1
GMFG	0.0648981	-0.346249	0.343	0.643	1
ARHGAP12	0.0649823	-0.403834	0.069	0.214	1
LINC00847	0.0649823	-0.419006	0.069	0.214	1
EXOC5	0.0649823	-0.43489	0.069	0.214	1
MARCKS	0.0650057	-0.294954	0.745	1	1
AC099560.2	0.0651226	0.792538	0.294	0.071	1
KIAA1551	0.0654972	-0.377556	0.275	0.5	1
UGCG	0.0657625	0.713394	0.304	0.071	1
ANKRD49	0.0659539	-0.383468	0.108	0.286	1
SEC11A	0.0662356	-0.436395	0.206	0.429	1
PHF11	0.066256	-0.310651	0.157	0.357	1
CCDC47	0.066256	-0.348772	0.157	0.357	1
PFDN6	0.0671315	-0.417851	0.118	0.286	1
WSB1	0.0674132	-0.447219	0.441	0.714	1
UBE2E3	0.067554	-0.285719	0.069	0.214	1
CCNT1	0.067554	-0.308368	0.069	0.214	1
PLK3	0.067554	-0.362301	0.069	0.214	1
2020-09-11	0.0676064	0.566516	0.284	0.071	1
CCNL1	0.0678519	0.786902	0.627	0.571	1
ICE1	0.0681217	-0.2738	0.108	0.286	1
AIG1	0.0681217	-0.293659	0.108	0.286	1
TOP1	0.0689749	-0.440303	0.304	0.571	1
RPL35	0.0691322	-0.387432	0.667	0.929	1
LY86	0.0696278	-0.364284	0.343	0.571	1
PSMD13	0.0702088	-0.298112	0.069	0.214	1
DNAJB14	0.0703476	-0.295556	0.108	0.286	1
HMGB1	0.0714162	-0.397716	0.794	0.929	1
CAPZA1	0.0714679	-0.382546	0.206	0.429	1
PHACTR1	0.0715639	0.76761	0.441	0.214	1
FCER1G	0.072214	-0.461717	0.804	0.929	1
IRF2	0.0724167	-0.361661	0.167	0.357	1
CYP27A1	0.072459	0.676758	0.196	0	1
ARL5B	0.072459	0.658862	0.196	0	1
PDXDC1	0.072459	0.64388	0.196	0	1
YBX1P1	0.072459	0.624075	0.196	0	1
MT-TS2	0.072459	0.585578	0.196	0	1
COLEC12	0.072459	0.554838	0.196	0	1
GPN3	0.072459	0.548848	0.196	0	1
ZBED5	0.072459	0.515018	0.196	0	1
TLR7	0.072459	0.505985	0.196	0	1
TOB1	0.072459	0.449962	0.196	0	1
COX6B1	0.0728883	-0.404346	0.549	0.786	1
PPIP5K2	0.0734884	-0.281089	0.147	0.357	1
UHMK1	0.0737131	-0.364419	0.118	0.286	1
RALBP1	0.0738299	-0.303331	0.343	0.643	1
CLTC	0.0751408	-0.389502	0.206	0.429	1
STK3	0.0757753	-0.281866	0.069	0.214	1
CCDC58	0.0757753	-0.282811	0.069	0.214	1
CSF2RA	0.0757753	-0.457828	0.069	0.214	1
CTAGE5	0.0761328	-0.368023	0.157	0.357	1
LSM7	0.0761341	-0.664028	0.157	0.357	1
TCEAL9	0.0772921	0.699963	0.275	0.071	1
QARS	0.0773859	-0.250675	0.108	0.286	1
RPL37A	0.0776381	-0.32099	0.804	0.857	1
KLF2	0.0781226	-0.28951	0.186	0.429	1
MYLIP	0.0782472	-0.270847	0.157	0.357	1
NDUFB3	0.0791785	0.597422	0.275	0.071	1
RTN3	0.079376	-0.30811	0.314	0.571	1
CTSB	0.0798962	-0.430546	0.892	0.857	1
HLA-DRB1	0.0801051	0.36766	0.971	1	1
FTH1	0.0801075	0.568655	1	1	1
PAK2	0.0801693	-0.269338	0.471	0.857	1
CYBB	0.0806723	-0.295352	0.716	1	1
RPS12	0.080801	-0.272991	0.804	1	1
MAN2A1	0.0814268	0.645708	0.186	0	1
SLC38A2	0.0814268	0.573831	0.186	0	1
FPR3	0.0814268	0.565179	0.186	0	1
IFIT3	0.0814268	0.537096	0.186	0	1
APP	0.0814268	0.520906	0.186	0	1
APBB1IP	0.0815915	-0.417448	0.471	0.643	1
DAP	0.0821614	-0.280386	0.147	0.357	1
ZNF91	0.0823892	-0.339675	0.108	0.286	1
VMA21	0.0826166	-0.341621	0.157	0.357	1
TOMM7	0.0827465	0.5097	0.529	0.286	1
MEAF6	0.0833036	-0.272678	0.118	0.286	1
SCNM1	0.0833036	-0.416818	0.118	0.286	1
DAB2	0.084086	0.643445	0.686	0.643	1
SNRPG	0.0841578	-0.296857	0.275	0.5	1
NUDCD3	0.0847954	-0.255835	0.069	0.214	1
DSE	0.0851062	-0.300176	0.216	0.429	1
CYBA	0.0852058	-0.562659	0.647	0.857	1
C4orf3	0.0856759	0.557686	0.392	0.143	1
GPX4	0.0864037	0.489986	0.578	0.357	1
C3	0.0868932	-0.364381	0.235	0.429	1
PMF1	0.0870112	-0.416753	0.039	0.143	1
ILF3-AS1	0.0871015	0.894065	0.275	0.071	1
WIPI2	0.0871817	-0.356487	0.157	0.357	1
NUDT16	0.0874556	-0.425239	0.078	0.214	1
VPS25	0.0874556	-0.439707	0.078	0.214	1
SHOC2	0.0880149	-0.295549	0.284	0.571	1
DYNC1LI1	0.0890092	-0.251697	0.196	0.429	1
BRI3	0.0890328	0.599948	0.667	0.571	1
F13A1	0.0892784	-0.473114	0.216	0.429	1
GNB2	0.0894985	-0.569781	0.265	0.429	1
BDP1	0.0895395	-0.26157	0.157	0.357	1
BEST1	0.0896261	-0.439543	0.167	0.357	1
RPL4	0.0899372	-0.31515	0.49	0.714	1
DDX5	0.090264	0.509578	0.794	0.786	1
EIF4E2	0.0903828	-0.265286	0.108	0.286	1
DHX16	0.0905884	-0.413969	0.078	0.214	1
TARS	0.0911392	-0.284251	0.118	0.286	1
2020-09-08	0.0911627	-0.404085	0.039	0.143	1
LINC01681	0.0911627	-0.688593	0.039	0.143	1
NR4A3	0.0914188	0.771159	0.176	0	1
TRIM24	0.0914188	0.68423	0.176	0	1
AL136987.1	0.0914188	0.656305	0.176	0	1
TMX4	0.0914188	0.631343	0.176	0	1
AP2A2	0.0914188	0.607178	0.176	0	1
REV3L	0.0914188	0.599337	0.176	0	1
PRMT9	0.0914188	0.559809	0.176	0	1
PLPP3	0.0914188	0.533796	0.176	0	1
ENOSF1	0.0914188	0.486532	0.176	0	1
CIAO1	0.0914188	0.47715	0.176	0	1
MITF	0.0914188	0.475005	0.176	0	1
IDS	0.0914188	0.455419	0.176	0	1
TOX4	0.0914188	0.436064	0.176	0	1
ATOX1	0.0915258	-0.328649	0.255	0.5	1
BLOC1S1	0.0931541	-0.403209	0.235	0.429	1
UBXN1	0.0932238	0.456185	0.304	0.071	1
MLLT10	0.0938108	-0.322773	0.078	0.214	1
ZNFX1	0.093879	-0.286438	0.118	0.286	1
MT2A	0.0940247	1.03019	0.539	0.286	1
CD46	0.0954239	0.483911	0.363	0.143	1
RWDD1	0.0954239	-0.434164	0.314	0.5	1
MGAT2	0.0954719	-0.258891	0.039	0.143	1
IRF7	0.0954719	-0.262207	0.039	0.143	1
ASCC1	0.0954719	-0.280398	0.039	0.143	1
TRMT1	0.0954719	-0.304079	0.039	0.143	1
HERC2P2	0.0954719	-0.306525	0.039	0.143	1
PRKAB1	0.0954719	-0.395435	0.039	0.143	1
DUS4L	0.0954719	-0.405724	0.039	0.143	1
HSPE1	0.0957278	0.543757	0.725	0.714	1
C1orf162	0.0958689	-0.608679	0.363	0.571	1
ZNF106	0.0959163	-0.379818	0.265	0.5	1
PSME4	0.0966845	-0.311826	0.118	0.286	1
TLK1	0.0966845	-0.706434	0.118	0.286	1
ELF1	0.0967315	0.609076	0.353	0.143	1
VTA1	0.0971246	-0.27378	0.078	0.214	1
SCAMP3	0.0971246	-0.284248	0.078	0.214	1
FUOM	0.0971246	-0.297025	0.078	0.214	1
CDC42	0.0975946	-0.321653	0.676	0.929	1
THRAP3	0.098572	-0.267507	0.324	0.571	1
FTLP3	0.0991261	0.953559	0.471	0.286	1
RPS11	0.0995035	-0.360191	0.735	0.929	1
CHEK2	0.0999427	-0.262221	0.039	0.143	1
ENPP2	0.0999427	-0.269945	0.039	0.143	1
PAXX	0.0999427	-0.332569	0.039	0.143	1
AURKA	0.0999427	-0.466711	0.039	0.143	1
GADD45G	0.100533	0.863655	0.255	0.071	1
APOE	0.100603	1.3302	0.716	0.714	1
PKN2	0.100984	-0.378982	0.186	0.357	1
MT-TW	0.101925	0.281624	0.304	0.071	1
MPHOSPH8	0.102377	-0.51416	0.284	0.5	1
COMMD3	0.102496	-0.273511	0.118	0.286	1
SDF2L1	0.102496	-0.32869	0.118	0.286	1
KDM6B	0.10255	0.580412	0.167	0	1
CFDP1	0.10255	0.572905	0.167	0	1
ATF7IP	0.10255	0.534088	0.167	0	1
FAM162A	0.10255	0.526248	0.167	0	1
TMED2	0.10255	0.519289	0.167	0	1
NCK1-AS1	0.10255	0.476025	0.167	0	1
HLA-DQB2	0.10255	0.467327	0.167	0	1
ABCG1	0.10255	0.464659	0.167	0	1
LPIN2	0.10255	0.464353	0.167	0	1
OSTF1	0.10255	0.460561	0.167	0	1
PRR14L	0.10255	0.414074	0.167	0	1
NBPF14	0.10255	0.374653	0.167	0	1
HERPUD1	0.103127	0.636485	0.637	0.5	1
LILRB4	0.103783	-0.440283	0.245	0.429	1
RNF20	0.104033	-0.3655	0.078	0.214	1
CITED2	0.104297	0.445235	0.373	0.143	1
DPP7	0.104377	-0.281184	0.284	0.571	1
PARP12	0.104579	-0.254574	0.039	0.143	1
FBXO33	0.104579	-0.258841	0.039	0.143	1
TRIM52-AS1	0.104579	-0.266655	0.039	0.143	1
KCNK6	0.104579	-0.32564	0.039	0.143	1
OGFRL1	0.104929	-0.322292	0.363	0.643	1
EIF5A	0.105193	-0.341569	0.216	0.429	1
HDAC2	0.105365	-0.252255	0.206	0.429	1
MRPS15	0.105482	-0.372971	0.127	0.286	1
PPIB	0.10596	-0.461935	0.382	0.571	1
FLOT1	0.10606	-0.402865	0.186	0.357	1
KIN	0.10763	-0.25084	0.078	0.214	1
RAB6A	0.10763	-0.262947	0.078	0.214	1
MAPK1	0.10763	-0.301224	0.078	0.214	1
MRPL9	0.10763	-0.339452	0.078	0.214	1
CARD16	0.10764	-0.304785	0.216	0.429	1
RAP1A	0.108035	-0.32846	0.373	0.643	1
MARCO	0.108583	-0.25987	0.118	0.286	1
MT-TE	0.109731	0.799679	0.559	0.429	1
CHMP1B	0.110282	0.475727	0.363	0.143	1
YME1L1	0.111561	-0.319832	0.265	0.5	1
PTAFR	0.112546	-0.292959	0.314	0.5	1
RAB13	0.112955	0.574311	0.255	0.071	1
MIDN	0.112955	-0.255365	0.206	0.429	1
FTH1P8	0.114392	0.64723	0.245	0.071	1
TMEM179B	0.114392	0.624681	0.245	0.071	1
CCNH	0.114392	0.6022	0.245	0.071	1
DNAJC19	0.11468	-0.362448	0.127	0.286	1
HSBP1	0.114764	-0.283707	0.225	0.429	1
WASL	0.114952	0.550791	0.157	0	1
PHLDA1	0.114952	0.533654	0.157	0	1
AL118558.3	0.114952	0.523876	0.157	0	1
RABGAP1L	0.114952	0.517033	0.157	0	1
FOXN2	0.114952	0.493489	0.157	0	1
EIF4E	0.114952	0.471506	0.157	0	1
ZMYND11	0.114952	0.46795	0.157	0	1
PLEKHA3	0.114952	0.425554	0.157	0	1
ELOA	0.114952	0.416948	0.157	0	1
AL365357.1	0.114952	0.415648	0.157	0	1
HPGDS	0.114952	0.402506	0.157	0	1
VAMP2	0.114952	0.368142	0.157	0	1
C12orf45	0.11512	-0.335307	0.078	0.214	1
ISCU	0.115162	0.617274	0.314	0.143	1
RPS29	0.115358	0.404001	0.863	0.786	1
AAK1	0.115608	-0.252307	0.167	0.357	1
ZEB2	0.11673	-0.320246	0.373	0.571	1
SAT1	0.116799	-0.375014	0.912	0.929	1
RPL30	0.11765	0.424574	0.814	0.786	1
RGS18	0.117765	-0.26332	0.176	0.357	1
ATP6V1G1	0.118561	-0.329984	0.422	0.643	1
IQGAP1	0.118625	-0.464595	0.569	0.714	1
GNAS	0.119253	-0.329745	0.686	0.857	1
SERPINB1	0.119637	-0.390804	0.186	0.357	1
RGCC	0.120105	0.854296	0.314	0.143	1
CSDE1	0.12064	-0.321124	0.461	0.643	1
SH3BGRL	0.120906	0.408243	0.667	0.643	1
RBM25	0.122134	-0.313301	0.52	0.786	1
ESD	0.122605	0.567668	0.245	0.071	1
SUCLG2	0.123557	-0.410049	0.137	0.286	1
ZNF271P	0.123732	-0.331698	0.088	0.214	1
VAMP8	0.123951	-0.267276	0.451	0.714	1
NXF1	0.124496	-0.259048	0.127	0.286	1
PHF20	0.124496	-0.306346	0.127	0.286	1
RPS3A	0.124548	0.397773	0.873	0.786	1
COLGALT1	0.12466	-0.667053	0.225	0.357	1
SARS	0.127008	-0.362581	0.196	0.357	1
CD93	0.127693	-0.361528	0.088	0.214	1
RHOT1	0.127693	-0.396056	0.088	0.214	1
ABR	0.127693	-0.450577	0.088	0.214	1
NR4A2	0.127994	0.48053	0.52	0.357	1
CCT6A	0.128406	-0.258593	0.363	0.571	1
RAD21	0.128509	-0.383604	0.402	0.643	1
GSTK1	0.128582	-0.26669	0.284	0.5	1
MMP7	0.128771	0.498213	0.147	0	1
GCHFR	0.128773	0.738158	0.147	0	1
FABP5P7	0.128773	0.675959	0.147	0	1
EMP1	0.128773	0.591243	0.147	0	1
LACTB2	0.128773	0.587495	0.147	0	1
SPARC	0.128773	0.562436	0.147	0	1
SLAMF7	0.128773	0.561008	0.147	0	1
ZC2HC1A	0.128773	0.547086	0.147	0	1
BX284668.5	0.128773	0.503906	0.147	0	1
SF3B4	0.128773	0.470836	0.147	0	1
TBC1D22A	0.128773	0.461116	0.147	0	1
GRPEL1	0.128773	0.427545	0.147	0	1
HAX1	0.128773	0.425022	0.147	0	1
VEZF1	0.128773	0.422767	0.147	0	1
LGALS8	0.128773	0.41317	0.147	0	1
PABPC1P3	0.128773	0.412388	0.147	0	1
CCDC107	0.128773	0.4104	0.147	0	1
PIK3C2A	0.128773	0.405597	0.147	0	1
NFKBID	0.128773	0.404135	0.147	0	1
CHTF8	0.128773	0.376718	0.147	0	1
URI1	0.128773	0.373835	0.147	0	1
TNRC6A	0.128773	0.369827	0.147	0	1
ARCN1	0.128773	0.361511	0.147	0	1
SNX1	0.128773	0.347359	0.147	0	1
LHFPL2	0.128773	0.306364	0.147	0	1
SESN3	0.129638	-0.455166	0.176	0.357	1
IRF1	0.129887	0.610553	0.333	0.143	1
NUDT3	0.129969	-0.323481	0.196	0.357	1
LAPTM4A	0.130373	0.61591	0.431	0.286	1
PPIA	0.130813	-0.394733	0.618	0.786	1
CEP135	0.131752	-0.427073	0.088	0.214	1
GIGYF2	0.133334	-0.320404	0.255	0.429	1
PSMB2	0.133702	-0.312553	0.137	0.286	1
SLC25A5	0.134658	0.558365	0.51	0.357	1
UBA52	0.134959	-0.318971	0.657	0.857	1
CDC73	0.135541	-0.54307	0.147	0.286	1
ANKRD17	0.135913	-0.392876	0.176	0.357	1
SPP1	0.136673	-0.376229	0.667	0.714	1
IVD	0.137223	-0.256332	0.137	0.286	1
PNKD	0.137223	-0.407134	0.137	0.286	1
ASH1L	0.137308	0.444923	0.245	0.071	1
DOCK10	0.137684	-0.309361	0.186	0.357	1
HSP90B1	0.138004	-0.450452	0.794	1	1
CEP63	0.13859	-0.280996	0.127	0.286	1
SCD	0.138656	-0.429859	0.235	0.429	1
TMBIM6	0.139143	-0.281832	0.716	0.929	1
CYB5A	0.139174	0.61248	0.235	0.071	1
ESF1	0.139174	-0.340742	0.196	0.357	1
TUBA1B	0.140583	-0.417493	0.824	0.929	1
ATP5F1E	0.141177	-0.388198	0.882	0.929	1
RN7SL2	0.142051	-0.316922	0.049	0.143	1
PLEKHO1	0.142352	-0.398789	0.196	0.357	1
CHD9	0.143313	-0.366598	0.245	0.429	1
CLIP1	0.143709	-0.288756	0.216	0.429	1
CTSK	0.144186	0.615282	0.137	0	1
KNG1	0.144186	0.601511	0.137	0	1
ODR4	0.144186	0.518161	0.137	0	1
PMP22	0.144186	0.46952	0.137	0	1
RAB20	0.144186	0.450118	0.137	0	1
BSDC1	0.144186	0.445247	0.137	0	1
ATP6V0D2	0.144186	0.437408	0.137	0	1
PIAS1	0.144186	0.423182	0.137	0	1
RPL5P34	0.144186	0.421383	0.137	0	1
SETD5	0.144186	0.412278	0.137	0	1
RASSF2	0.144186	0.40027	0.137	0	1
AMZ2P1	0.144186	0.38881	0.137	0	1
RHOBTB3	0.144186	0.385659	0.137	0	1
RAB4A	0.144186	0.371782	0.137	0	1
COPA	0.144479	-0.32139	0.137	0.286	1
GSTP1	0.145221	0.57599	0.706	0.643	1
SERPING1	0.145762	-0.26242	0.176	0.357	1
MTHFD2	0.146182	-0.372286	0.147	0.286	1
C6orf62	0.146318	-0.279777	0.304	0.5	1
PARP1	0.147175	-0.265992	0.167	0.357	1
LMNA	0.147462	0.608279	0.225	0.071	1
NAA20	0.147462	0.501235	0.225	0.071	1
ATP1B1	0.147466	-0.271311	0.529	0.786	1
NDUFC1	0.147677	-0.301388	0.235	0.429	1
POLD3	0.147712	-0.523805	0.049	0.143	1
GTF2F1	0.147942	-0.340576	0.098	0.214	1
PFN1	0.148816	-0.33041	0.784	0.786	1
FNTA	0.148995	-0.297405	0.088	0.214	1
DEK	0.149587	-0.636718	0.569	0.643	1
TNFRSF1B	0.149867	-0.54151	0.147	0.286	1
BZW1	0.150781	-0.259144	0.235	0.429	1
PRRC2B	0.152026	-0.274032	0.137	0.286	1
CD86	0.152051	-0.304462	0.461	0.714	1
TTC1	0.152173	-0.399695	0.265	0.429	1
CLEC4E	0.152325	-0.278364	0.098	0.214	1
PGM2L1	0.153543	-0.302352	0.049	0.143	1
GOSR2	0.153543	-0.352703	0.049	0.143	1
RAPGEF6	0.153543	-0.476252	0.049	0.143	1
XIAP	0.153623	-0.496194	0.147	0.286	1
NDUFA4	0.154426	0.4067	0.657	0.5	1
ARHGDIB	0.155841	-0.262271	0.578	0.857	1
WBP11	0.157761	0.613732	0.225	0.071	1
NDUFAF3	0.157761	0.576793	0.225	0.071	1
MRFAP1	0.157828	-0.335123	0.167	0.357	1
BTN2A2	0.158238	-0.312577	0.088	0.214	1
ZFAND5	0.158737	0.546669	0.588	0.429	1
ZFAS1	0.159008	0.519444	0.382	0.214	1
PYCARD	0.159443	-0.705522	0.314	0.429	1
RHOT2	0.159548	-0.268393	0.049	0.143	1
CLPP	0.159548	-0.270934	0.049	0.143	1
SNAPC5	0.159548	-0.284591	0.049	0.143	1
SIGLEC9	0.159548	-0.293882	0.049	0.143	1
ELP3	0.159548	-0.303341	0.049	0.143	1
SMARCC1	0.16045	0.359136	0.324	0.143	1
HLA-DRB6	0.161223	0.40769	0.833	0.929	1
PPP1CB	0.161313	-0.250828	0.186	0.357	1
PNPLA8	0.161349	-0.429339	0.147	0.286	1
IFI27	0.161388	0.62306	0.127	0	1
LPL	0.161388	0.555811	0.127	0	1
RBP4	0.161388	0.540087	0.127	0	1
SNAPC1	0.161388	0.483009	0.127	0	1
RPL13AP5	0.161388	0.450089	0.127	0	1
ABCE1	0.161388	0.441896	0.127	0	1
SOS1	0.161388	0.438735	0.127	0	1
SLC35E3	0.161388	0.433384	0.127	0	1
ANKRD36	0.161388	0.415979	0.127	0	1
HSBP1L1	0.161388	0.414384	0.127	0	1
PIM3	0.161388	0.408328	0.127	0	1
TMEM251	0.161388	0.396878	0.127	0	1
SPRY1	0.161388	0.394269	0.127	0	1
ETV3	0.161388	0.384786	0.127	0	1
RABAC1	0.161388	0.382802	0.127	0	1
AXL	0.161388	0.381663	0.127	0	1
BMPR2	0.161388	0.359369	0.127	0	1
CPNE1	0.161388	0.352902	0.127	0	1
PPFIBP2	0.161388	0.35276	0.127	0	1
GTF2B	0.161388	0.326612	0.127	0	1
CASC3	0.161388	0.322675	0.127	0	1
S100A13	0.161388	0.302918	0.127	0	1
COX6A1	0.161854	-0.285778	0.49	0.714	1
ADAM28	0.163583	0.437791	0.324	0.143	1
SKIL	0.164693	0.591274	0.363	0.214	1
UCP2	0.164738	-0.395235	0.265	0.429	1
PSMB3	0.165035	-0.267326	0.294	0.5	1
ARPC5	0.165381	-0.297715	0.588	0.714	1
CD300C	0.165729	-0.285407	0.049	0.143	1
PIK3CD	0.165729	-0.307654	0.049	0.143	1
CUEDC2	0.165729	-0.343161	0.049	0.143	1
TXNDC15	0.165729	-0.520128	0.049	0.143	1
AL590867.2	0.166174	0.38054	0.235	0.071	1
HIF1A	0.166761	-0.252566	0.284	0.429	1
IGSF6	0.167667	0.527777	0.843	0.857	1
ACBD5	0.167909	-0.272294	0.088	0.214	1
FBL	0.168014	-0.255584	0.137	0.286	1
FAM177A1	0.168597	0.475794	0.225	0.071	1
ASAH1	0.169463	0.543478	0.657	0.571	1
CXXC5	0.169809	0.403306	0.235	0.071	1
RPL7	0.169826	0.306921	0.804	0.929	1
AC005912.1	0.170857	0.679436	0.216	0.071	1
SLC16A9	0.172088	-0.252085	0.049	0.143	1
ABHD14B	0.172088	-0.254338	0.049	0.143	1
SAMM50	0.172088	-0.255906	0.049	0.143	1
UBAP2L	0.172088	-0.295461	0.049	0.143	1
C16orf72	0.172088	-0.323918	0.049	0.143	1
MPC2	0.17233	-0.257816	0.186	0.357	1
SSFA2	0.172908	-0.266518	0.088	0.214	1
NUPL2	0.172908	-0.305713	0.088	0.214	1
PDIA4	0.173483	-0.252888	0.147	0.286	1
CCDC186	0.173483	-0.410749	0.147	0.286	1
IFRD1	0.173503	0.465206	0.235	0.071	1
PDCD5	0.173503	-0.301284	0.196	0.357	1
UBE2B	0.175498	-0.282635	0.245	0.429	1
EMILIN2	0.176467	-0.25068	0.137	0.286	1
FUCA1	0.177257	0.553947	0.235	0.071	1
UPP1	0.177257	0.47236	0.235	0.071	1
NCOA4	0.177664	-0.344758	0.373	0.571	1
ZNF800	0.177676	-0.319239	0.147	0.286	1
NRP2	0.178113	0.34371	0.245	0.071	1
PRRC2C	0.178308	-0.305215	0.529	0.714	1
PPP1R15B	0.17859	0.441245	0.216	0.071	1
MT-ND6	0.18035	0.394005	0.294	0.143	1
VEGFA	0.180614	0.486755	0.118	0	1
XRRA1	0.180614	0.422464	0.118	0	1
CNRIP1	0.180614	0.408547	0.118	0	1
METTL23	0.180614	0.40175	0.118	0	1
RPAP2	0.180614	0.390952	0.118	0	1
CXCL12	0.180614	0.390432	0.118	0	1
SRGAP1	0.180614	0.387574	0.118	0	1
TGIF1	0.180614	0.379654	0.118	0	1
FBXL3	0.180614	0.379045	0.118	0	1
INTS10	0.180614	0.373828	0.118	0	1
PSMD2	0.180614	0.369003	0.118	0	1
NR2F2	0.180614	0.368821	0.118	0	1
MRPL43	0.180614	0.365549	0.118	0	1
RANBP9	0.180614	0.362262	0.118	0	1
ARFIP1	0.180614	0.358538	0.118	0	1
CNOT6L	0.180614	0.355978	0.118	0	1
NFU1	0.180614	0.349406	0.118	0	1
FIP1L1	0.180614	0.343514	0.118	0	1
ZNF317	0.180614	0.336865	0.118	0	1
SCRN1	0.180614	0.325571	0.118	0	1
PPFIBP1	0.180614	0.32091	0.118	0	1
NRBP1	0.180614	0.318336	0.118	0	1
RPL10P16	0.180614	0.318267	0.118	0	1
RBMXL1	0.180614	0.314687	0.118	0	1
JKAMP	0.180614	0.314315	0.118	0	1
ZNF385A	0.180614	0.307537	0.118	0	1
PON2	0.180614	0.306169	0.118	0	1
RPL39P3	0.180614	0.303329	0.118	0	1
AC092809.2	0.180614	0.298055	0.118	0	1
S100A2	0.180614	0.289633	0.118	0	1
GPR108	0.180614	0.277639	0.118	0	1
EIF4EBP2	0.180614	0.277011	0.118	0	1
NPM1P39	0.180614	0.275779	0.118	0	1
CARD19	0.180614	0.272704	0.118	0	1
COA5	0.180614	0.270344	0.118	0	1
TRIM8	0.180614	0.259085	0.118	0	1
SDF4	0.180614	0.257888	0.118	0	1
SERTAD1	0.180614	0.254433	0.118	0	1
RPS27L	0.18077	0.584213	0.412	0.286	1
DARS	0.181071	-0.271799	0.196	0.357	1
PCBP2	0.182248	0.28904	0.5	0.286	1
SDS	0.182553	0.645213	0.216	0.071	1
NRIP1	0.185206	-0.346909	0.324	0.429	1
KIDINS220	0.186287	-0.265169	0.147	0.286	1
PLEKHA2	0.18658	0.429862	0.216	0.071	1
SNRPB2	0.187074	-0.273141	0.422	0.643	1
RPL22	0.189021	-0.323641	0.706	0.929	1
ENO1	0.189022	-0.481428	0.392	0.571	1
CAB39	0.189083	0.423873	0.206	0.071	1
RPL27A	0.190379	0.292609	0.941	1	1
SBDS	0.190673	0.433142	0.216	0.071	1
TRIM22	0.191018	-0.26859	0.098	0.214	1
BTG3	0.191018	-0.299562	0.098	0.214	1
MSH3	0.191018	-0.316041	0.098	0.214	1
UMOD	0.191078	1.04317	0.294	0.143	1
PPP1R18	0.191379	-0.438618	0.167	0.286	1
IK	0.192034	-0.253238	0.333	0.5	1
SREK1IP1	0.19329	0.563436	0.206	0.071	1
ZNHIT1	0.19329	0.46646	0.206	0.071	1
MT-ND4L	0.193291	0.260328	0.98	0.929	1
CFD	0.194478	0.490314	0.333	0.143	1
RBX1	0.194478	-0.270456	0.294	0.429	1
TXNL1	0.194832	-0.279241	0.176	0.357	1
OLR1	0.194994	0.798569	0.382	0.286	1
PPM1G	0.195202	-0.397665	0.147	0.286	1
FKBP15	0.195839	0.419735	0.304	0.143	1
ADGRE5	0.196323	-0.375348	0.098	0.214	1
SPATS2L	0.196742	0.390267	0.314	0.143	1
TRMT112	0.197224	-0.273462	0.324	0.5	1
CD68	0.197736	0.520714	0.49	0.357	1
MAFF	0.198487	0.707148	0.294	0.143	1
ARL4A	0.198882	0.671862	0.373	0.214	1
HCK	0.198882	-0.257119	0.333	0.5	1
MAN1A1	0.199056	0.40516	0.216	0.071	1
NDUFA5	0.200101	-0.505324	0.167	0.286	1
CMKLR1	0.201735	-0.283919	0.098	0.214	1
CXCL1	0.20214	0.732398	0.108	0	1
AKAP12	0.20214	0.501309	0.108	0	1
CCDC152	0.20214	0.437685	0.108	0	1
AC100810.1	0.20214	0.427647	0.108	0	1
CYTH1	0.20214	0.422838	0.108	0	1
LINC00963	0.20214	0.402322	0.108	0	1
ELOF1	0.20214	0.375377	0.108	0	1
CCR5	0.20214	0.372344	0.108	0	1
COPS5	0.20214	0.367258	0.108	0	1
NAPG	0.20214	0.366933	0.108	0	1
HTRA4	0.20214	0.35309	0.108	0	1
SURF6	0.20214	0.349994	0.108	0	1
MUS81	0.20214	0.347863	0.108	0	1
GPATCH8	0.20214	0.343266	0.108	0	1
COQ4	0.20214	0.341713	0.108	0	1
SDC4	0.20214	0.328869	0.108	0	1
DOK2	0.20214	0.324088	0.108	0	1
TTC9C	0.20214	0.322516	0.108	0	1
ZNF281	0.20214	0.307991	0.108	0	1
MAP3K13	0.20214	0.305669	0.108	0	1
RARRES1	0.20214	0.300927	0.108	0	1
CYP1B1	0.20214	0.298161	0.108	0	1
UAP1	0.20214	0.291301	0.108	0	1
AGTPBP1	0.20214	0.287241	0.108	0	1
TRIM13	0.20214	0.276319	0.108	0	1
MAF1	0.20214	0.273803	0.108	0	1
NFKBIB	0.20214	0.266797	0.108	0	1
NUP58	0.20214	0.265116	0.108	0	1
MRAS	0.20214	0.257285	0.108	0	1
MFHAS1	0.20214	0.25606	0.108	0	1
GMPS	0.20214	0.250961	0.108	0	1
SOD2	0.203599	0.347668	0.451	0.286	1
TRIM38	0.204569	-0.331097	0.167	0.286	1
PSME2	0.204907	-0.461018	0.255	0.357	1
STARD7	0.205238	0.318947	0.235	0.071	1
RNPC3	0.206322	0.493272	0.206	0.071	1
TLR6	0.206347	-0.403153	0.059	0.143	1
USP37	0.206347	-0.419484	0.059	0.143	1
MRPL58	0.206347	-0.424945	0.059	0.143	1
HRH2	0.206347	-0.458467	0.059	0.143	1
HLA-DQA1	0.2077	0.422372	0.745	0.786	1
NCF2	0.207846	0.542542	0.363	0.214	1
KDM5A	0.20911	-0.270131	0.167	0.286	1
SFT2D1	0.209155	-0.266418	0.147	0.286	1
MKRN1	0.209155	-0.318252	0.147	0.286	1
CCL4	0.209995	-0.480607	0.735	0.714	1
MEF2C	0.21011	-0.310025	0.598	0.714	1
DNAJC1	0.210147	-0.270532	0.216	0.357	1
XRCC5	0.211255	-0.310448	0.373	0.5	1
CDKN1A	0.212789	0.477633	0.284	0.143	1
C1orf35	0.212883	-0.305375	0.098	0.214	1
JDP2	0.213359	-0.251047	0.059	0.143	1
CYC1	0.213723	0.573772	0.196	0.071	1
NDUFAB1	0.214034	-0.317692	0.157	0.286	1
GDF15	0.215361	0.420176	0.206	0.071	1
PRNP	0.217121	-0.320979	0.324	0.429	1
CLU	0.21755	0.343173	0.225	0.071	1
NFKBIA	0.217945	0.34044	0.853	0.643	1
ANXA2	0.218345	0.600156	0.637	0.571	1
NPM1P27	0.219985	0.409921	0.206	0.071	1
PDP1	0.220541	-0.290879	0.059	0.143	1
CXCL2	0.221233	0.969199	0.412	0.286	1
ITPRIPL2	0.222909	-0.367279	0.216	0.357	1
NSMCE1	0.223168	0.37523	0.196	0.071	1
RPL15	0.226918	0.331489	0.882	1	1
NDUFA11	0.22692	-0.258227	0.265	0.429	1
SUMO2	0.227843	0.355489	0.539	0.429	1
ARHGAP35	0.227896	-0.290308	0.059	0.143	1
KMO	0.227896	-0.316487	0.059	0.143	1
CLIC1	0.228214	-0.369997	0.461	0.714	1
A2M	0.228383	0.355227	0.784	0.857	1
NFIA	0.22862	-0.291875	0.157	0.286	1
S100A9	0.22862	-0.443619	0.157	0.286	1
RNF130	0.23032	0.408678	0.363	0.214	1
SNAP29	0.23043	-0.279587	0.098	0.214	1
ASPH	0.23043	-0.319003	0.098	0.214	1
WDR43	0.230515	0.356145	0.216	0.071	1
DPH3	0.230515	0.329149	0.216	0.071	1
NPEPPS	0.230816	-0.323911	0.108	0.214	1
CAPG	0.231078	0.736025	0.471	0.357	1
NRDC	0.23261	-0.425559	0.304	0.429	1
PHKB	0.232908	0.408584	0.196	0.071	1
NDUFS4	0.232908	0.379352	0.196	0.071	1
RRN3P1	0.234282	0.440771	0.206	0.071	1
S100A6	0.234707	0.430125	0.755	0.643	1
ADA2	0.235213	-0.302508	0.265	0.429	1
KDM3A	0.235423	-0.298851	0.059	0.143	1
HLA-DQB1	0.235717	0.431475	0.814	0.857	1
BAG4	0.236698	-0.327616	0.108	0.214	1
CDK12	0.236698	-0.371115	0.108	0.214	1
RPS4X	0.237208	0.364094	0.716	0.786	1
TMEM50A	0.237719	-0.254425	0.392	0.571	1
C11orf54	0.23789	0.400899	0.196	0.071	1
SSB	0.238614	-0.336172	0.441	0.643	1
NTAN1	0.239191	0.423834	0.206	0.071	1
UBQLN1	0.23964	0.601321	0.265	0.143	1
COPB1	0.24098	0.50351	0.275	0.143	1
TOB2	0.241306	0.348421	0.186	0.071	1
CSPP1	0.243125	-0.266145	0.059	0.143	1
YPEL3	0.243125	-0.335031	0.059	0.143	1
WASF2	0.24362	-0.279724	0.431	0.571	1
CD164	0.245158	0.327855	0.382	0.214	1
ZFP36L2	0.246194	0.420061	0.657	0.643	1
MTND2P28	0.246837	0.407317	0.343	0.214	1
FKBP5	0.247857	-0.346163	0.118	0.214	1
REX1BD	0.248078	0.373352	0.196	0.071	1
SAMD9L	0.248078	-0.299204	0.167	0.286	1
CALM1	0.248198	-0.33887	0.833	0.929	1
UBXN7	0.251002	-0.275916	0.059	0.143	1
HELLS	0.251002	-0.412352	0.059	0.143	1
HSPA8	0.251521	0.513209	0.667	0.571	1
ATF4	0.252812	0.311512	0.353	0.214	1
SLC31A1	0.254146	-0.251659	0.225	0.357	1
MT-ND3	0.25434	0.275539	0.99	1	1
SSRP1	0.256504	0.494798	0.255	0.143	1
NDUFB6	0.256504	0.38733	0.255	0.143	1
BSG	0.257927	-0.306403	0.235	0.357	1
FN1	0.258567	1.26929	0.196	0.071	1
HLA-C	0.259077	-0.257791	0.765	0.929	1
ERBIN	0.259108	0.421829	0.275	0.143	1
KPNB1	0.260161	-0.290676	0.333	0.5	1
ZFYVE16	0.260814	0.375319	0.294	0.143	1
PNRC1	0.26163	0.384961	0.657	0.571	1
ERICH1	0.262178	-0.41203	0.176	0.286	1
MARK3	0.262618	0.429605	0.186	0.071	1
TANK	0.26381	0.570215	0.343	0.214	1
HSPA1B	0.264575	0.414157	0.618	0.643	1
BAG3	0.264699	0.491873	0.284	0.143	1
C4orf48	0.264699	0.34664	0.284	0.143	1
MT1E	0.265405	0.630947	0.294	0.143	1
PCF11	0.26627	0.435037	0.333	0.214	1
SRSF5	0.266511	0.366071	0.422	0.286	1
TIMP2	0.27213	0.558978	0.373	0.286	1
ZBTB1	0.272168	0.485644	0.176	0.071	1
TMSB4XP4	0.272168	0.435895	0.176	0.071	1
MAPK1IP1L	0.274871	-0.312807	0.167	0.286	1
EIF3F	0.27592	0.466816	0.255	0.143	1
ARL6IP1	0.276695	-0.544183	0.48	0.714	1
SCLT1	0.277011	-0.343467	0.069	0.143	1
CARD8-AS1	0.277011	-0.423146	0.069	0.143	1
RSRC1	0.277695	0.464923	0.324	0.214	1
G3BP1	0.278416	-0.297085	0.225	0.357	1
TCEAL3	0.278856	-0.469441	0.118	0.214	1
CYCS	0.279799	0.488616	0.382	0.286	1
PNISR	0.280084	-0.284772	0.275	0.429	1
KCNJ5	0.280458	0.386565	0.196	0.071	1
MAP3K8	0.283453	-0.40136	0.225	0.357	1
AC104046.1	0.283818	0.538696	0.176	0.071	1
FARP1	0.283818	0.334691	0.176	0.071	1
BLVRB	0.2843	-0.50278	0.304	0.429	1
TOR2A	0.285165	-0.282896	0.069	0.143	1
SLC25A4	0.285165	-0.294345	0.069	0.143	1
BAX	0.285196	0.353959	0.186	0.071	1
LYZ	0.289227	0.509238	0.804	0.714	1
RUFY1	0.289768	0.338793	0.176	0.071	1
PDLIM5	0.291965	-0.289382	0.118	0.214	1
AKIP1	0.291965	-0.300926	0.118	0.214	1
SLC1A3	0.292211	0.531316	0.265	0.143	1
TM2D1	0.29348	-0.491541	0.069	0.143	1
INPP5D	0.29348	-0.592448	0.069	0.143	1
HNMT	0.294291	0.452643	0.314	0.214	1
HNRNPR	0.294291	-0.353616	0.284	0.429	1
TMEM208	0.295137	-0.283052	0.176	0.286	1
HSP90AB3P	0.296411	0.532804	0.324	0.214	1
PSMD6	0.296963	0.336683	0.186	0.071	1
MRC1	0.298353	0.578454	0.333	0.214	1
LRIF1	0.298672	-0.328566	0.118	0.214	1
SYNE1	0.301918	0.366317	0.176	0.071	1
ZNF37A	0.301956	-0.310864	0.069	0.143	1
SQLE	0.301956	-0.327902	0.069	0.143	1
GATB	0.301956	-0.349095	0.069	0.143	1
SGK1	0.302998	0.358644	0.716	0.643	1
CPM	0.303139	0.51824	0.333	0.214	1
PLAUR	0.303373	0.673386	0.373	0.286	1
MGLL	0.304004	0.694774	0.314	0.214	1
ALOX5AP	0.304257	-0.302647	0.275	0.357	1
ATP6V1A	0.305481	-0.336297	0.118	0.214	1
JAK1	0.306658	0.436731	0.451	0.357	1
ARHGAP15	0.306714	-0.273772	0.176	0.286	1
NCOA7	0.306714	-0.291355	0.176	0.286	1
ADD3	0.306714	-0.292099	0.176	0.286	1
ZMYND8	0.307801	0.339322	0.265	0.143	1
LRP1	0.307975	-0.311645	0.304	0.429	1
TCF25	0.30847	-0.300814	0.373	0.5	1
GINM1	0.30942	-0.309055	0.186	0.286	1
MORF4L2	0.30942	-0.341928	0.186	0.286	1
TUFM	0.309546	-0.25254	0.167	0.286	1
C6orf48	0.310991	0.406143	0.324	0.214	1
TMEM258	0.311097	0.421676	0.451	0.357	1
RPL13P12	0.311449	0.301794	0.412	0.286	1
C3orf58	0.313099	0.314194	0.167	0.071	1
SNX3	0.313128	0.301257	0.539	0.429	1
DDIT4	0.314402	0.331578	0.176	0.071	1
RBM6	0.31525	-0.269206	0.186	0.286	1
CRBN	0.317694	0.511452	0.255	0.143	1
CSNK2A1	0.319379	-0.467911	0.206	0.286	1
ZNF844	0.319594	0.381077	0.167	0.071	1
DDX18	0.321691	-0.278008	0.363	0.5	1
KDELR1	0.321901	0.361134	0.304	0.214	1
CUTA	0.322203	0.406438	0.245	0.143	1
TERF1	0.326178	0.339852	0.167	0.071	1
TMEM87A	0.326178	0.316	0.167	0.071	1
CRTAP	0.327076	0.416081	0.304	0.214	1
POLR2C	0.328352	-0.262012	0.069	0.143	1
CD99	0.328471	0.475217	0.363	0.286	1
MKNK2	0.329322	-0.301081	0.127	0.214	1
HLA-DMA	0.329373	0.36172	0.696	0.714	1
DNAJC21	0.32943	0.310301	0.265	0.143	1
RAB42	0.332849	0.680302	0.167	0.071	1
THUMPD3-AS1	0.332849	0.331007	0.167	0.071	1
SPRED1	0.332849	0.316684	0.167	0.071	1
RPL18AP3	0.333756	0.328117	0.176	0.071	1
SLC2A3	0.337474	-0.536723	0.069	0.143	1
GM2A	0.337586	0.45953	0.304	0.214	1
CDV3	0.338061	0.403323	0.333	0.214	1
NFIC	0.339287	-0.271084	0.186	0.286	1
ACADM	0.340061	0.325879	0.255	0.143	1
PDCD10	0.340605	0.270347	0.265	0.143	1
HNRNPF	0.340605	-0.467421	0.235	0.357	1
FXYD5	0.341245	0.317121	0.608	0.5	1
APLP2	0.341956	0.388016	0.784	0.714	1
AMD1	0.342922	0.465097	0.304	0.214	1
PCMT1	0.345299	0.349566	0.157	0.071	1
RPS3AP6	0.345299	0.342797	0.157	0.071	1
HSD17B12	0.345299	-0.376467	0.137	0.214	1
TRIM44	0.345806	0.350352	0.255	0.143	1
TACC1	0.346102	-0.34584	0.275	0.357	1
NR3C1	0.346819	0.374317	0.324	0.214	1
MIA3	0.351614	0.294695	0.255	0.143	1
GTPBP4	0.35165	-0.370984	0.078	0.143	1
PLEK	0.351787	-0.302274	0.529	0.643	1
CLEC10A	0.352387	0.355615	0.157	0.071	1
NEDD9	0.352387	0.318242	0.157	0.071	1
SDHB	0.352387	0.316522	0.157	0.071	1
CD52	0.353618	1.3622	0.363	0.286	1
ITM2C	0.353862	0.288373	0.176	0.071	1
LARS	0.357482	0.336525	0.255	0.143	1
YIPF3	0.358132	-0.335871	0.127	0.214	1
HSPA1A	0.358163	0.390915	0.814	0.714	1
DNAJC2	0.359566	0.374324	0.157	0.071	1
ADD1	0.359566	0.367548	0.157	0.071	1
STAT3	0.359566	0.286817	0.157	0.071	1
ELL2	0.360406	0.295479	0.167	0.071	1
FRMD4A	0.360725	-0.366759	0.078	0.143	1
RPS19	0.361752	0.262029	0.863	0.929	1
NDUFB9	0.362275	0.330854	0.373	0.286	1
S100A10	0.363521	0.391212	0.657	0.643	1
TRA2B	0.364285	0.301006	0.529	0.357	1
MRPL1	0.365575	-0.266279	0.127	0.214	1
PPCS	0.366706	0.347455	0.314	0.214	1
FBXO7	0.366834	0.284793	0.157	0.071	1
HLA-DQA2	0.367004	0.34855	0.627	0.571	1
ZCCHC6	0.36734	-0.495821	0.206	0.286	1
ZCCHC2	0.367513	0.346931	0.167	0.071	1
METTL26	0.367513	0.308044	0.167	0.071	1
FUCA2	0.368301	0.27505	0.235	0.143	1
CCL3L1	0.369167	-0.861622	0.696	0.714	1
DENR	0.369333	-0.449514	0.255	0.357	1
HECTD1	0.369403	0.351746	0.255	0.143	1
HS2ST1	0.369945	-0.291487	0.078	0.143	1
KIAA0355	0.369945	-0.304596	0.078	0.143	1
RFC3	0.369945	-0.438241	0.078	0.143	1
TERF2IP	0.372575	0.288699	0.353	0.214	1
TUBGCP2	0.374198	0.354068	0.157	0.071	1
NAA50	0.374198	0.286669	0.157	0.071	1
RSRP1	0.376633	0.45697	0.382	0.357	1
ROCK1	0.377079	-0.336959	0.373	0.5	1
TSPAN31	0.379311	-0.335673	0.078	0.143	1
RRP15	0.379311	-0.475745	0.078	0.143	1
SESN1	0.380748	-0.329046	0.127	0.214	1
SMIM26	0.381768	0.325372	0.304	0.214	1
SERF2	0.382635	-0.293117	0.775	0.857	1
RPL39	0.383981	0.292231	0.833	0.857	1
OXA1L	0.384101	-0.280234	0.186	0.286	1
GRN	0.38589	0.488909	0.667	0.714	1
FAM46A	0.38753	0.495402	0.304	0.214	1
EZR	0.387834	0.440478	0.451	0.357	1
FCER1A	0.388478	0.570855	0.147	0.071	1
PPARG	0.388478	0.334571	0.147	0.071	1
EMC10	0.388478	0.328942	0.147	0.071	1
TIMM17B	0.388478	0.319828	0.147	0.071	1
MRPL19	0.388478	0.265773	0.147	0.071	1
HPCAL1	0.388478	0.263819	0.147	0.071	1
ZNF280D	0.388821	-0.25183	0.078	0.143	1
PTTG1	0.388821	-0.497057	0.078	0.143	1
FAM50A	0.389352	0.282645	0.167	0.071	1
DNAJC9	0.389352	-0.384606	0.147	0.214	1
ROCK2	0.390786	-0.30749	0.186	0.286	1
UACA	0.393534	0.365686	0.235	0.143	1
CNOT1	0.396302	0.346865	0.147	0.071	1
SETD3	0.396302	0.260634	0.147	0.071	1
AKAP8	0.396302	0.26048	0.147	0.071	1
TRAM1	0.396311	0.376951	0.363	0.286	1
ALKBH7	0.396804	-0.41203	0.147	0.214	1
FABP5	0.397502	0.760277	0.559	0.571	1
PDCD11	0.398475	-0.397141	0.078	0.143	1
EBAG9	0.400686	0.348336	0.392	0.286	1
FEZ2	0.401292	0.390398	0.284	0.214	1
SOX4	0.403966	0.605704	0.422	0.357	1
GPATCH2L	0.404221	0.459342	0.147	0.071	1
PDIA3P1	0.404221	0.413712	0.147	0.071	1
PFDN2	0.404221	0.293083	0.147	0.071	1
CCDC14	0.404221	0.263766	0.147	0.071	1
FAM13B	0.405397	0.388219	0.216	0.143	1
BIRC3	0.406109	0.530552	0.225	0.143	1
TOMM20	0.406758	0.325034	0.314	0.214	1
BCLAF1	0.407156	0.262499	0.608	0.5	1
SYK	0.410601	0.302128	0.343	0.214	1
HSD17B11	0.411331	0.417875	0.275	0.214	1
MRPL14	0.412234	0.309323	0.147	0.071	1
USP12	0.412234	0.258243	0.147	0.071	1
SMARCC2	0.412358	0.290195	0.157	0.071	1
IFI30	0.413129	0.378978	0.235	0.143	1
CDC37	0.413129	0.278821	0.235	0.143	1
AP1B1	0.413474	0.408413	0.284	0.214	1
SELENOK	0.414001	0.364747	0.451	0.357	1
PIK3R1	0.414806	0.274112	0.412	0.357	1
BCAP31	0.415402	0.319936	0.294	0.214	1
JMY	0.41821	-0.33939	0.078	0.143	1
PSMC1	0.420258	0.293388	0.157	0.071	1
CCT7	0.42034	0.267904	0.147	0.071	1
TNFAIP3	0.422149	0.477249	0.373	0.286	1
ZFHX3	0.422253	0.288321	0.343	0.214	1
CPVL	0.422668	-0.296088	0.49	0.571	1
NPC2	0.423185	0.291785	0.951	1	1
TCEAL4	0.425196	0.350388	0.333	0.286	1
EIF3K	0.425448	0.359787	0.431	0.357	1
POLR2E	0.425873	0.367498	0.284	0.214	1
IL18	0.425873	0.318368	0.284	0.214	1
ATP6V0B	0.427817	0.39665	0.569	0.5	1
G0S2	0.42815	0.372806	0.343	0.214	1
PLK2	0.428539	0.294779	0.147	0.071	1
PLD3	0.429128	0.525806	0.461	0.429	1
BRCC3	0.43326	0.264466	0.225	0.143	1
HSPH1	0.436518	0.439075	0.588	0.571	1
SERINC3	0.436553	0.380085	0.275	0.214	1
IGFBP5	0.436777	0.627418	0.137	0.071	1
SMIM25	0.436777	0.552963	0.137	0.071	1
VAT1	0.436777	0.442288	0.137	0.071	1
INTS6	0.436777	0.332972	0.137	0.071	1
COPZ1	0.436777	0.28533	0.137	0.071	1
CD24	0.436777	0.274403	0.137	0.071	1
RPL3P4	0.436777	0.259165	0.137	0.071	1
WAS	0.438168	-0.31438	0.088	0.143	1
DMAC2	0.438168	-0.37051	0.088	0.143	1
SLC39A10	0.438486	0.410599	0.284	0.214	1
NKTR	0.441737	0.295719	0.304	0.214	1
RPL10A	0.443793	0.25946	0.608	0.571	1
CHI3L1	0.445397	0.754697	0.137	0.071	1
SERPINF1	0.445397	0.401104	0.137	0.071	1
MRPS10	0.445397	0.331142	0.137	0.071	1
HCAR2	0.445397	0.292477	0.137	0.071	1
CCDC82	0.445397	0.273752	0.137	0.071	1
HLA-F	0.445397	0.270431	0.137	0.071	1
SNX29	0.447139	0.298244	0.216	0.143	1
PHPT1	0.448016	0.282652	0.304	0.214	1
NDUFS6	0.448016	-0.252511	0.284	0.357	1
IFIH1	0.448081	-0.274124	0.088	0.143	1
PTOV1	0.448081	-0.316581	0.088	0.143	1
LRP10	0.448081	-0.357776	0.088	0.143	1
ACP1	0.454112	0.331269	0.137	0.071	1
BTN2A1	0.454112	0.294982	0.137	0.071	1
RBM47	0.454347	-0.270588	0.284	0.357	1
CSTA	0.457802	0.280703	0.284	0.214	1
VPS13C	0.457972	0.430996	0.441	0.429	1
HACD2	0.45812	-0.32471	0.088	0.143	1
SPCS2	0.460724	0.457646	0.265	0.214	1
CRYL1	0.461069	-0.294429	0.137	0.214	1
FDX1	0.461579	0.527488	0.216	0.143	1
ASAP1	0.461579	0.286111	0.216	0.143	1
GLS	0.461579	0.257857	0.216	0.143	1
TAGLN2	0.465804	0.411422	0.451	0.429	1
CXorf21	0.467659	-0.409926	0.147	0.214	1
HSD17B4	0.467659	-0.435091	0.147	0.214	1
C12orf43	0.468285	-0.324669	0.088	0.143	1
MIEN1	0.468632	0.288937	0.225	0.143	1
GAPT	0.468888	0.47121	0.206	0.143	1
LILRA2	0.471829	0.412775	0.137	0.071	1
ERO1B	0.471829	0.339094	0.137	0.071	1
C12orf65	0.471829	0.263298	0.137	0.071	1
AC016739.1	0.472213	0.334962	0.382	0.286	1
IGFBP7	0.475295	1.02353	0.49	0.5	1
MRPS18B	0.476007	0.308506	0.275	0.214	1
ESCO1	0.476216	0.287955	0.196	0.143	1
TPP2	0.476275	0.321439	0.216	0.143	1
KDSR	0.476392	0.33638	0.206	0.143	1
AKR1B1	0.478116	0.40193	0.363	0.286	1
FAM96A	0.478841	0.371766	0.314	0.286	1
STMN1	0.482483	-0.342656	0.216	0.286	1
DDX21	0.483783	-0.536509	0.324	0.429	1
RIOK3	0.48392	0.33341	0.196	0.143	1
HSP90AA2P	0.484226	0.422297	0.382	0.357	1
GSPT1	0.485604	0.381111	0.294	0.214	1
PARP4	0.486519	0.31506	0.333	0.286	1
SEC31A	0.487712	0.440071	0.304	0.286	1
EIF4A2	0.488151	0.318894	0.431	0.357	1
CYLD	0.489921	0.326212	0.137	0.071	1
MT-TV	0.490097	0.275448	0.343	0.286	1
RPS19BP1	0.490824	0.279169	0.127	0.071	1
DDX52	0.490824	0.264207	0.127	0.071	1
NCF1C	0.490824	0.259879	0.127	0.071	1
TSTD1	0.490824	0.25282	0.127	0.071	1
CSGALNACT2	0.491597	0.260605	0.206	0.143	1
ANKRD11	0.491691	0.321625	0.196	0.143	1
AP3B1	0.493047	-0.376521	0.245	0.286	1
CEP350	0.494088	0.375106	0.431	0.357	1
EIF3A	0.499073	0.3718	0.569	0.571	1
SUGT1	0.499296	0.330117	0.206	0.143	1
FOSB	0.499321	0.280365	0.441	0.357	1
TOPBP1	0.499515	-0.277887	0.088	0.143	1
NDUFS7	0.499528	0.382042	0.196	0.143	1
ZNF652	0.500298	0.314691	0.127	0.071	1
MAP4K4	0.500298	0.303771	0.127	0.071	1
ATP1A1	0.502187	0.343175	0.49	0.429	1
CHCHD2	0.502563	-0.313157	0.451	0.5	1
ATP6V1F	0.505509	0.326931	0.529	0.571	1
RPS15A	0.506513	0.266457	0.627	0.714	1
AC103591.3	0.50662	-0.28022	0.157	0.214	1
SEC13	0.50662	-0.415895	0.157	0.214	1
PPM1K	0.507058	0.261377	0.206	0.143	1
TSG101	0.507431	0.301804	0.196	0.143	1
STK17B	0.507431	0.255153	0.196	0.143	1
IFNGR1	0.509299	0.351324	0.343	0.286	1
PAXBP1	0.509868	0.314593	0.127	0.071	1
RNF141	0.509868	0.295532	0.127	0.071	1
RAB18	0.509868	0.274072	0.127	0.071	1
SNHG1	0.509868	0.251237	0.127	0.071	1
RAP1B	0.515966	0.276439	0.265	0.214	1
ALDH9A1	0.518542	-0.310631	0.147	0.214	1
NAA10	0.520933	-0.363233	0.088	0.143	1
MED13L	0.525515	0.28169	0.284	0.214	1
AC024293.1	0.526445	0.31763	0.294	0.214	1
CCL5	0.527196	0.615677	0.137	0.071	1
WASHC2C	0.527292	-0.270325	0.147	0.214	1
SMCHD1	0.527818	-0.253101	0.294	0.357	1
FAAP20	0.529292	0.26358	0.127	0.071	1
RALA	0.530721	0.290345	0.206	0.143	1
COMMD6	0.531369	0.279519	0.422	0.357	1
SLC12A1	0.539688	0.48997	0.196	0.143	1
CXCL8	0.539863	0.380833	0.559	0.5	1
ZNF644	0.54791	0.358829	0.196	0.143	1
HVCN1	0.54791	0.316004	0.196	0.143	1
ALDH3B1	0.549086	0.25918	0.127	0.071	1
RPL6P27	0.550973	0.346765	0.255	0.214	1
TFRC	0.551337	0.302426	0.118	0.071	1
GLMP	0.551337	0.301007	0.118	0.071	1
MRPS16	0.551337	0.285947	0.118	0.071	1
RNF19A	0.553988	-0.304446	0.147	0.214	1
ATP6V1B2	0.555602	-0.380518	0.225	0.286	1
TSC22D1	0.557215	0.386896	0.186	0.143	1
CNPY3	0.557215	0.314605	0.186	0.143	1
RRAGD	0.557215	0.25226	0.186	0.143	1
ADIRF	0.559118	0.309341	0.127	0.071	1
MMADHC	0.561723	0.344325	0.118	0.071	1
NAA15	0.561723	0.290585	0.118	0.071	1
ID3	0.561723	0.273294	0.118	0.071	1
SMS	0.562656	0.452535	0.324	0.286	1
ANXA1	0.564296	-0.25275	0.529	0.571	1
CCRL2	0.564537	0.253166	0.196	0.143	1
SELENOS	0.56781	0.312265	0.275	0.214	1
NAT8	0.569207	-0.342197	0.098	0.143	1
DHRS7	0.569775	0.411573	0.49	0.5	1
AIMP1	0.572398	0.345714	0.245	0.214	1
OTUD6B-AS1	0.572941	0.339919	0.196	0.143	1
CCDC174	0.574296	0.321542	0.186	0.143	1
HEXB	0.579724	0.324773	0.382	0.357	1
ERGIC3	0.58114	0.34359	0.255	0.214	1
LRPAP1	0.581258	0.488441	0.363	0.357	1
CEPT1	0.581403	0.279456	0.196	0.143	1
CAST	0.586647	0.289475	0.627	0.643	1
CFLAR	0.587246	0.372615	0.373	0.357	1
SDCBP	0.587801	0.268917	0.578	0.571	1
CD47	0.588647	-0.542329	0.167	0.214	1
HLA-DPB1	0.589886	0.26183	0.843	0.929	1
NFE2L1	0.59162	0.269709	0.186	0.143	1
CD37	0.593812	0.258482	0.333	0.286	1
IFNGR2	0.594612	0.327315	0.235	0.214	1
TNFSF12	0.60203	0.334553	0.176	0.143	1
AZI2	0.611027	0.25319	0.176	0.143	1
RBMX2	0.611086	0.308333	0.088	0.143	1
BHLHE41	0.613697	0.356237	0.353	0.286	1
MCRIP1	0.619143	0.329251	0.108	0.071	1
ARIH2	0.619143	0.327494	0.108	0.071	1
KNOP1	0.619143	0.293356	0.108	0.071	1
CSTB	0.619307	1.24082	0.637	0.857	1
DDX3X	0.619344	0.380489	0.245	0.214	1
TAF1D	0.619344	0.255257	0.245	0.214	1
SNHG12	0.620082	0.318679	0.176	0.143	1
HEXA	0.62012	0.347038	0.304	0.286	1
LMO4	0.62012	0.288705	0.304	0.286	1
CCT2	0.62057	0.38602	0.284	0.286	1
CDC16	0.621107	-0.376228	0.127	0.071	1
[truncated: 88 more rows]
